# Supplementary material for: The preparation of difluoromethylated indoles via electrochemical oxidation under catalyst- and oxidant-free conditions
Source: Royal Society of Chemistry journal article supplement (doi:10.1039/d3ob00516j), 2023-01-01

## The preparation of difluoromethylated indoles via electrochemical oxidation under catalyst- and oxidant-free conditions

Dong Zhang <sup>a,\*</sup>, Wenqiao Chang <sup>a</sup>, Yun Li <sup>a</sup>, Songying Zhan <sup>a</sup>, Junjie Pan <sup>a</sup>, Shunhui Cai <sup>a</sup>, Na Li <sup>a</sup>, Xiaoqin Yang <sup>a</sup>, Zheng Fang <sup>b</sup>

<sup>a</sup> School of Pharmacy, Yancheng Teachers University, Yancheng 224007, China.

<sup>b</sup> College of Biotechnology and Pharmaceutical Engineering, Nanjing Tech University, Nanjing 211816, China.

\*Corresponding Author(s): Dong Zhang, E-mail: zhangd@yctu.edu.cn

### Table of contents

|                                                                                                             |            |
|-------------------------------------------------------------------------------------------------------------|------------|
| <b>1. General Information</b>                                                                               | <b>S1</b>  |
| <b>2. Experimental Section</b>                                                                              | <b>S1</b>  |
| <b>2.1 Synthesis of starting material</b>                                                                   | <b>S1</b>  |
| <b>2.2 Experimental device</b>                                                                              | <b>S1</b>  |
| <b>2.3 Optimization of other Reaction Conditions</b>                                                        | <b>S2</b>  |
| <b>2.4 General procedures for the synthesis of difluoromethylated indoles via electrochemical oxidation</b> | <b>S2</b>  |
| <b>2.5 Scale-up synthesis of 3a</b>                                                                         | <b>S11</b> |
| <b>2.6 Derivatization of product 3a</b>                                                                     | <b>S11</b> |
| <b>2.7 Cyclic voltammetry (CV) experiments</b>                                                              | <b>S12</b> |
| <b>2.8 Free radical trapping experiment</b>                                                                 | <b>S13</b> |
| <b>3. Reference</b>                                                                                         | <b>S14</b> |
| <b>4. <sup>1</sup>H NMR, <sup>19</sup>F NMR and <sup>13</sup>C NMR spectra</b>                              | <b>S15</b> |

## 1. General Information

All reactions were carried out with magnetic stirring and in dried glassware. Standard syringe techniques were applied for transfer of dry solvents. Unless otherwise indicated, all commercially available chemicals were used without purification.  $^1\text{H}$  NMR (400 MHz),  $^{13}\text{C}$  NMR (101 MHz), and  $^{19}\text{F}$  NMR (376 MHz) were measured on a 400 M spectrometer. The chemical shifts are given in parts per million (ppm) on the delta ( $\delta$ ) scale.  $^1\text{H}$  NMR chemical shifts were determined relative to internal tetramethylsilane (TMS) at  $\delta$  7.26 ppm.  $^{13}\text{C}$  NMR chemical shifts were determined relative to  $\text{CDCl}_3$  at  $\delta$  77.16 ppm. The following abbreviations are used to explain multiplicities: s = singlet, d = doublet, dd = doublet of doublet, t = triplet, td=triplet of doublet, q = quartet, m = multiplet, and br = broad. Analytical thin-layer chromatography (TLC) was performed on 0.2 mm coated silica gel plates, and the course of the reactions were visualized using a UV light 254 nm. High-resolution mass spectra (HRMS) were obtained on an Agilent mass spectrometer using electrospray ionization-time-of-flight (ESI-TOF).

## 2. Experimental Section

### 2.1 Synthesis of starting material <sup>[1]</sup>

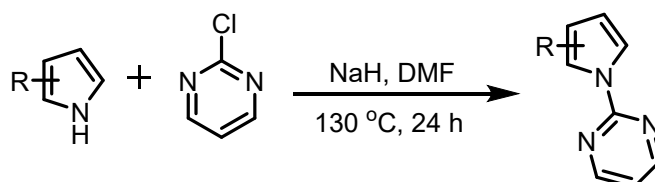

In an oven-dried flask (100 mL), NaH (60% dispersion in mineral oil, 11 mmol) was added in portions at 0 °C to a stirred solution of the corresponding indoles or pyrrole (10 mmol) in DMF (25 mL). After stirring for 30min at 0 °C, 2-chloropyrimidine (12 mmol) was added and the mixture was stirred at 130 °C for 24 h. Then, the reaction mixture was cooled to room temperature, poured into  $\text{H}_2\text{O}$  (300 mL) and extracted with EtOAc (4×50 mL). The combined organic phase was dried over  $\text{Na}_2\text{SO}_4$ . The filtrate was concentrated in vacuo and the crude product was purified by column chromatography on silica gel (n-hexane/EtOAc) to give the desired product.

### 2.2 Experimental device

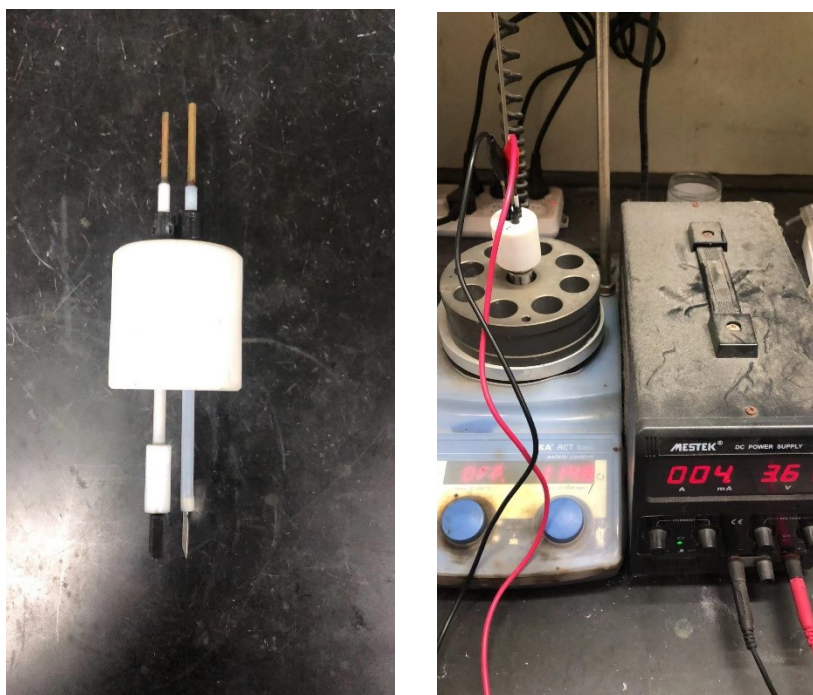

Figure S1. Experimental device

### 2.3 Optimization of other Reaction Conditions

Table S1. Screen the loading of **2** and electrode <sup>a, b</sup>

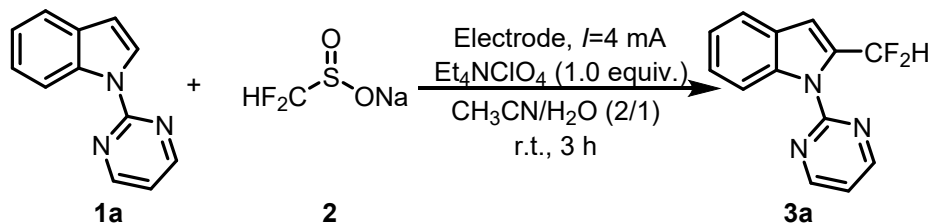

| Entry | HF <sub>2</sub> CSO <sub>2</sub> Na (equiv.) | electrode       | Yield (%) <sup>b</sup> |
|-------|----------------------------------------------|-----------------|------------------------|
| 1     | 2.0                                          | C (+)   Pt (-)  | 73                     |
| 2     | 1.0                                          | C (+)   Pt (-)  | 44                     |
| 3     | 1.5                                          | C (+)   Pt (-)  | 57                     |
| 4     | 3.0                                          | C (+)   Pt (-)  | 71                     |
| 5     | 2.0                                          | C (+)   C (-)   | 15                     |
| 6     | 2.0                                          | Pt (+)   Pt (-) | 0                      |
| 7     | 2.0                                          | Pt (+)   C (-)  | 0                      |

<sup>a</sup> Reaction conditions: undivided cell, electrode, 4 mA, **1a** (0.2 mmol, 1.0 equiv.), **2** (equiv.), Et<sub>4</sub>NClO<sub>4</sub> (1.0 equiv.), CH<sub>3</sub>CN/H<sub>2</sub>O (6 mL, v/v = 2/1), stirred under air in an open tube at room temperature for 3 h. <sup>b</sup> Isolated yield.

### 2.4 General procedures for the synthesis of difluoromethylated indoles via electrochemical oxidation

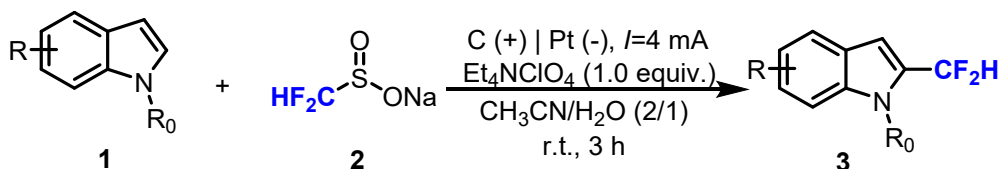

A 50 mL vial was charged with substrate **1** (0.2 mmol, 1.0 equiv.), **2** (0.4 mmol, 2.0 equiv.), Et<sub>4</sub>NClO<sub>4</sub> (0.2 mmol, 1.0 equiv.), CH<sub>3</sub>CN/H<sub>2</sub>O (6 mL, v/v = 2/1) and a magnetic stir bar. The vial was equipped with a graphite electrode as an anode and platinum electrode (10 mm × 10 mm × 0.1 mm) as cathode. The whole cell was an undivided cell. The reaction mixture was stirred and electrolyzed at a constant current of 4 mA without a reference electrode under room temperature for 3 h (2.24 F mol<sup>-1</sup>). After completion of the reaction, it was monitored with TLC, the reaction mixture was diluted with EtOAc (10 mL) and filtered through a silica gel pad. The vial and silica gel were washed with an additional volume of EtOAc (20 mL). The filtrate was concentrated in vacuo, and the resulting residue was purified by flash column chromatography using EtOAc/*n*-hexane as an eluent to afford the product **3**. It should be noted that only moderate yields were obtained for most case mostly due to the system voltage increasing with the consumption of electrolyte. The substrates and products would be decomposed quickly at a high voltage, which made the yield hard to improve.

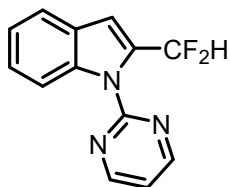

2-(Difluoromethyl)-1-(pyrimidin-2-yl)-1*H*-indole (**3a**)

White solid, <sup>1</sup>H NMR (400 MHz, CDCl<sub>3</sub>) δ 8.74 (d, *J* = 4.6 Hz, 2H), 8.69 (d, *J* = 8.2 Hz, 1H), 7.96 – 7.64 (m, 2H), 7.41 (t, *J* = 7.5 Hz, 1H), 7.29 (t, *J* = 7.1 Hz, 1H), 7.15 (s, 1H), 7.11 (t, *J* = 4.6 Hz, 1H). <sup>19</sup>F NMR (376 MHz, CDCl<sub>3</sub>) δ -117.77 (s, 2F). <sup>13</sup>C NMR (101 MHz, CDCl<sub>3</sub>) δ 158.18, 157.73, 137.45, 133.30 (t, *J* = 28.9 Hz), 128.20, 125.37, 122.84, 121.78, 117.15, 115.92, 110.79 (t, *J* = 234.8 Hz), 109.29 (t, *J* = 6.3 Hz). HRMS (ESI-TOF) *m/z* Calcd for C<sub>13</sub>H<sub>9</sub>F<sub>2</sub>N<sub>3</sub> [M+H]<sup>+</sup>: 246.0837, found: 246.0829.

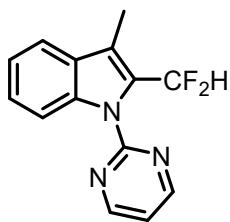

2-(Difluoromethyl)-3-methyl-1-(pyrimidin-2-yl)-1*H*-indole (**3b**)

White solid,  $^1\text{H}$  NMR (400 MHz,  $\text{CDCl}_3$ )  $\delta$  8.76 (d,  $J = 4.3$  Hz, 2H), 8.52 (d,  $J = 8.1$  Hz, 1H), 7.81 (t,  $J = 53.8$  Hz, 1H), 7.65 (d,  $J = 7.4$  Hz, 1H), 7.39 (t,  $J = 7.7$  Hz, 1H), 7.30 (t,  $J = 7.2$  Hz, 1H), 7.13 (t,  $J = 4.8$  Hz, 1H), 2.56 (t,  $J = 3.3$  Hz, 3H).  $^{19}\text{F}$  NMR (376 MHz,  $\text{CDCl}_3$ )  $\delta$  -110.48 (s, 2F).  $^{13}\text{C}$  NMR (101 MHz,  $\text{CDCl}_3$ )  $\delta$  158.29, 157.88, 136.53, 129.96, 128.45 – 127.18 (m), 125.65, 122.47, 119.91 (t,  $J = 2.5$  Hz), 119.65, 117.00, 115.26, 112.09 (t,  $J = 234.3$  Hz), 9.40 (t,  $J = 2.9$  Hz). HRMS (ESI-TOF)  $m/z$  Calcd for  $\text{C}_{14}\text{H}_{11}\text{F}_2\text{N}_3$   $[\text{M}+\text{H}]^+$ : 260.0994, found: 260.0979.

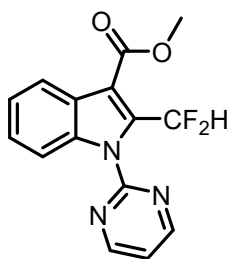

Methyl 2-(difluoromethyl)-1-(pyrimidin-2-yl)-1*H*-indole-3-carboxylate (**3c**)

White solid,  $^1\text{H}$  NMR (400 MHz,  $\text{CDCl}_3$ )  $\delta$  8.89 (d,  $J = 4.8$  Hz, 2H), 8.22 (d,  $J = 7.0$  Hz, 1H), 7.96 – 7.51 (m, 2H), 7.47 – 7.29 (m, 3H), 4.01 (s, 4H).  $^{19}\text{F}$  NMR (376 MHz,  $\text{CDCl}_3$ )  $\delta$  -112.58 (s, 2F).  $^{13}\text{C}$  NMR (101 MHz,  $\text{CDCl}_3$ )  $\delta$  164.71, 158.90, 157.01, 136.91, 135.25 (t,  $J = 23.4$  Hz), 126.03, 125.52, 123.74, 122.64, 119.96, 112.85, 112.40 (t,  $J = 5.4$  Hz), 109.03 (t,  $J = 238.3$  Hz), 51.94. HRMS (ESI-TOF)  $m/z$  Calcd for  $\text{C}_{15}\text{H}_{11}\text{F}_2\text{N}_3\text{O}_2$   $[\text{M}+\text{H}]^+$ : 304.0892, found: 304.0883.

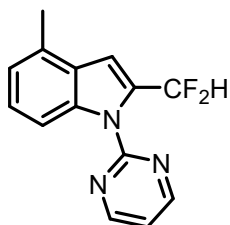

2-(Difluoromethyl)-4-methyl-1-(pyrimidin-2-yl)-1*H*-indole (**3d**)

White solid,  $^1\text{H}$  NMR (400 MHz,  $\text{CDCl}_3$ )  $\delta$  8.75 (d,  $J = 4.6$  Hz, 2H), 8.50 (d,  $J = 8.1$  Hz, 1H), 7.81 (t,  $J = 55.9$  Hz, 1H), 7.36 – 7.27 (m, 1H), 7.19 (s, 1H), 7.13 (t,  $J = 4.8$  Hz, 1H), 7.09 (d,  $J = 7.0$  Hz, 1H), 2.59 (s, 3H).  $^{19}\text{F}$  NMR (376 MHz,  $\text{CDCl}_3$ )  $\delta$  -117.49 (s, 2F).  $^{13}\text{C}$  NMR (101 MHz,  $\text{CDCl}_3$ )

$\delta$  158.20, 157.79, 137.29, 132.67 (t,  $J = 28.3$  Hz), 131.24, 127.93, 125.47, 123.15, 117.14, 113.38, 110.88 (t,  $J = 236.6$  Hz), 107.70 (t,  $J = 6.7$  Hz), 18.62. HRMS (ESI-TOF)  $m/z$  Calcd for  $C_{14}H_{11}F_2N_3$   $[M+H]^+$ : 260.0994, found: 260.0978.

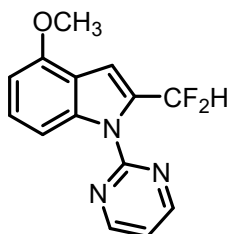

2-(Difluoromethyl)-4-methoxy-1-(pyrimidin-2-yl)-1*H*-indole (**3e**)

White solid,  $^1H$  NMR (400 MHz,  $CDCl_3$ )  $\delta$  8.74 (d,  $J = 4.8$  Hz, 2H), 8.24 (d,  $J = 8.1$  Hz, 1H), 7.77 (t,  $J = 56.5$  Hz, 1H), 7.30 (m, 2H), 7.13 (t,  $J = 4.8$  Hz, 1H), 6.69 (d,  $J = 7.6$  Hz, 1H), 3.97 (s, 3H).  $^{19}F$  NMR (376 MHz,  $CDCl_3$ )  $\delta$  -113.54 (s, 2F).  $^{13}C$  NMR (101 MHz,  $CDCl_3$ )  $\delta$  158.19, 157.79, 153.64, 138.69, 131.78 (t,  $J = 28.8$  Hz), 126.27, 118.84, 117.23, 110.78 (t,  $J = 236.1$  Hz), 108.79, 106.44 (t,  $J = 7.3$  Hz), 102.74, 55.56. HRMS (ESI-TOF)  $m/z$  Calcd for  $C_{14}H_{11}F_2N_3O$   $[M+H]^+$ : 276.0943, found: 260.0928.

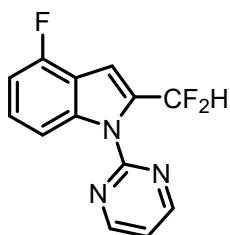

2-(Difluoromethyl)-4-fluoro-1-(pyrimidin-2-yl)-1*H*-indole (**3f**)

White solid,  $^1H$  NMR (400 MHz,  $CDCl_3$ )  $\delta$  8.77 (d,  $J = 4.6$  Hz, 2H), 8.44 (d,  $J = 8.3$  Hz, 1H), 7.77 (t,  $J = 55.3$  Hz, 1H), 7.34 – 7.29 (m, 1H), 7.23 (s, 1H), 7.18 (t,  $J = 4.8$  Hz, 1H), 7.01 – 6.87 (m, 1H).  $^{19}F$  NMR (376 MHz,  $CDCl_3$ )  $\delta$  -114.18 (s, 2F), -121.75 (s, 1F).  $^{13}C$  NMR (101 MHz,  $CDCl_3$ )  $\delta$  158.30, 157.64 (d,  $J = 4.8$  Hz), 155.19, 139.47 (d,  $J = 9.1$  Hz), 133.37 (t,  $J = 29.3$  Hz), 126.01 (d,  $J = 7.6$  Hz), 117.60, 117.34, 111.99 (d,  $J = 3.9$  Hz), 110.48 (t,  $J = 237.2$  Hz), 107.81 (d,  $J = 18.2$  Hz), 104.83 (t,  $J = 7.2$  Hz). HRMS (ESI-TOF)  $m/z$  Calcd for  $C_{13}H_8F_3N_3$   $[M+H]^+$ : 264.0743, found: 264.0729.

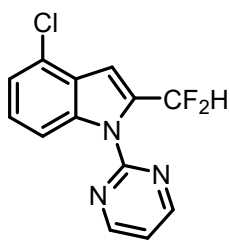

4-Chloro-2-(difluoromethyl)-1-(pyrimidin-2-yl)-1*H*-indole (**3g**)

White solid, <sup>1</sup>H NMR (400 MHz, CDCl<sub>3</sub>) δ 8.76 (d, *J* = 4.6 Hz, 2H), 8.56 (d, *J* = 7.3 Hz, 1H), 7.77 (t, *J* = 55.3 Hz, 1H), 7.33 – 7.27 (m, 2H), 7.25 (s, 1H), 7.17 (t, *J* = 4.6 Hz, 1H). <sup>19</sup>F NMR (376 MHz, CDCl<sub>3</sub>) δ -117.25 (s, 2F). <sup>13</sup>C NMR (101 MHz, CDCl<sub>3</sub>) δ 158.29, 157.49, 138.02, 133.88 (t, *J* = 29.1 Hz), 127.05, 126.95, 125.93, 122.57, 117.63, 114.58, 110.48 (t, *J* = 237.3 Hz), 107.36 (t, *J* = 7.1 Hz). HRMS (ESI-TOF) *m/z* Calcd for C<sub>13</sub>H<sub>8</sub>ClF<sub>2</sub>N<sub>3</sub> [M+H]<sup>+</sup>: 280.0448, found: 280.0425.

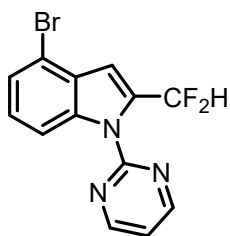

4-Bromo-2-(difluoromethyl)-1-(pyrimidin-2-yl)-1*H*-indole (**3h**)

White solid, <sup>1</sup>H NMR (400 MHz, CDCl<sub>3</sub>) δ 8.77 (d, *J* = 4.5 Hz, 2H), 8.62 (d, *J* = 8.1 Hz, 1H), 7.78 (t, *J* = 55.8 Hz, 1H), 7.44 (d, *J* = 7.4 Hz, 1H), 7.25 – 7.14 (m, 3H). <sup>19</sup>F NMR (376 MHz, CDCl<sub>3</sub>) δ -114.25 (s, 2F). <sup>13</sup>C NMR (101 MHz, CDCl<sub>3</sub>) δ 158.32, 157.57, 137.69, 133.93 (t, *J* = 29.3 Hz), 128.93, 126.21, 125.79, 117.66, 115.59, 115.11, 110.50 (t, *J* = 237.3 Hz), 109.14 (t, *J* = 7.1 Hz). HRMS (ESI-TOF) *m/z* Calcd for C<sub>13</sub>H<sub>8</sub>BrF<sub>2</sub>N<sub>3</sub> [M+H]<sup>+</sup>: 323.9942, found: 323.9923.

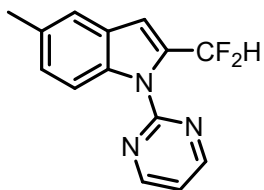

2-(Difluoromethyl)-5-methyl-1-(pyrimidin-2-yl)-1*H*-indole (**3i**)

White solid, <sup>1</sup>H NMR (400 MHz, CDCl<sub>3</sub>) δ 8.73 (d, *J* = 4.8 Hz, 2H), 8.56 (d, *J* = 8.4 Hz, 1H), 7.79 (t, *J* = 56.2 Hz, 1H), 7.45 (s, 1H), 7.21 (d, *J* = 8.6 Hz, 1H), 7.11 (t, *J* = 4.8 Hz, 1H), 7.06 (s, 1H), 2.47 (s, 3H). <sup>19</sup>F NMR (376 MHz, CDCl<sub>3</sub>) δ -113.65 (s, 2F). <sup>13</sup>C NMR (101 MHz, CDCl<sub>3</sub>) δ 158.14, 157.84, 135.80, 133.35 (t, *J* = 28.9 Hz), 132.32, 128.50, 126.90, 121.50, 116.91, 115.74, 110.84 (t, *J* = 236.9 Hz), 109.11 (t, *J* = 7.0 Hz). HRMS (ESI-TOF) *m/z* Calcd for C<sub>14</sub>H<sub>11</sub>F<sub>2</sub>N<sub>3</sub> [M+H]<sup>+</sup>

$\pm$ : 260.0994, found: 260.0975.

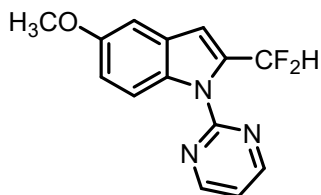

2-(Difluoromethyl)-5-methoxy-1-(pyrimidin-2-yl)-1*H*-indole (**3j**)

White solid,  $^1\text{H}$  NMR (400 MHz,  $\text{CDCl}_3$ )  $\delta$  8.72 (d,  $J = 4.8$  Hz, 2H), 8.60 (d,  $J = 8.9$  Hz, 1H), 7.79 (t,  $J = 55.9$  Hz, 1H), 7.14 – 7.08 (m, 2H), 7.06 (s, 1H), 7.02 (dd,  $J = 9.1, 2.3$  Hz, 1H), 3.88 (s, 3H).  $^{19}\text{F}$  NMR (376 MHz,  $\text{CDCl}_3$ )  $\delta$  -113.44 (s, 2F).  $^{13}\text{C}$  NMR (101 MHz,  $\text{CDCl}_3$ )  $\delta$  158.14, 157.70, 155.94, 134.31 – 133.08 (m), 132.35, 128.99, 117.13, 116.91, 114.90, 110.74 (t,  $J = 236.4$  Hz), 109.15 (t,  $J = 7.1$  Hz), 103.32, 55.79. HRMS (ESI-TOF)  $m/z$  Calcd for  $\text{C}_{14}\text{H}_{11}\text{F}_2\text{N}_3\text{O}$   $[\text{M}+\text{H}]^+$   $\pm$ : 276.0943, found: 260.0927.

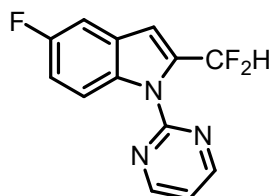

2-(Difluoromethyl)-5-fluoro-1-(pyrimidin-2-yl)-1*H*-indole (**3k**)

White solid,  $^1\text{H}$  NMR (400 MHz,  $\text{CDCl}_3$ )  $\delta$  8.76 (d,  $J = 4.8$  Hz, 2H), 8.66 (dd,  $J = 9.2, 4.6$  Hz, 1H), 7.78 (t,  $J = 55.9$  Hz, 1H), 7.31 (dd,  $J = 8.4, 2.8$  Hz, 1H), 7.16 (t,  $J = 4.7$  Hz, 1H), 7.14 – 7.06 (m, 2H).  $^{19}\text{F}$  NMR (376 MHz,  $\text{CDCl}_3$ )  $\delta$  -114.11 (s, 2F), -120.91 (s, 1F).  $^{13}\text{C}$  NMR (101 MHz,  $\text{CDCl}_3$ )  $\delta$  160.43, 158.25, 157.82 (d,  $J = 47.7$  Hz), 134.82 (t,  $J = 29.2$  Hz), 133.90, 128.94 (d,  $J = 10.1$  Hz), 117.34, 117.26, 113.45 (d,  $J = 25.2$  Hz), 110.55 (t,  $J = 236.8$  Hz), 109.06 – 108.88 (m), 106.79 (d,  $J = 23.6$  Hz). HRMS (ESI-TOF)  $m/z$  Calcd for  $\text{C}_{13}\text{H}_8\text{F}_3\text{N}_3$   $[\text{M}+\text{H}]^+$   $\pm$ : 264.0743, found: 264.0729.

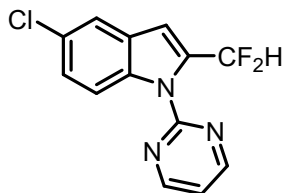

5-Chloro-2-(difluoromethyl)-1-(pyrimidin-2-yl)-1*H*-indole (**3l**)

White solid,  $^1\text{H}$  NMR (400 MHz,  $\text{CDCl}_3$ )  $\delta$  8.77 (d,  $J = 4.8$  Hz, 2H), 8.63 (d,  $J = 9.1$  Hz, 1H), 7.94 – 7.61 (m, 2H), 7.33 (dd,  $J = 9.1, 2.1$  Hz, 1H), 7.18 (t,  $J = 4.8$  Hz, 1H), 7.07 (s, 1H).  $^{19}\text{F}$  NMR (376 MHz,  $\text{CDCl}_3$ )  $\delta$  -114.45 (s, 2F).  $^{13}\text{C}$  NMR (101 MHz,  $\text{CDCl}_3$ )  $\delta$  158.29, 157.53, 135.82, 134.60



(t,  $J = 29.1$  Hz), 129.35, 128.40, 125.59, 121.16, 117.47, 117.28, 110.50 (t,  $J = 236.9$  Hz), 108.57 (t,  $J = 6.9$  Hz). HRMS (ESI-TOF)  $m/z$  Calcd for  $C_{13}H_8ClF_2N_3$   $[M+H]^+$ : 280.0448, found: 280.0426.

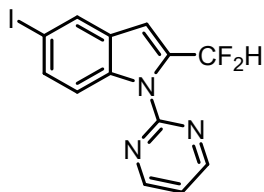

2-(Difluoromethyl)-5-iodo-1-(pyrimidin-2-yl)-1*H*-indole (**3m**)

White solid,  $^1H$  NMR (400 MHz,  $CDCl_3$ )  $\delta$  8.76 (d,  $J = 4.8$  Hz, 2H), 8.46 (d,  $J = 8.7$  Hz, 1H), 8.00 (s, 1H), 7.93 – 7.55 (m, 2H), 7.18 (t,  $J = 4.8$  Hz, 1H), 7.04 (s, 1H).  $^{19}F$  NMR (376 MHz,  $CDCl_3$ )  $\delta$  -114.21 (s, 2F).  $^{13}C$  NMR (101 MHz,  $CDCl_3$ )  $\delta$  158.28, 157.48, 136.65, 134.50 – 133.77 (m), 133.74, 130.50, 128.93, 118.02, 117.49, 110.43 (t,  $J = 238.4$  Hz), 108.16 (t,  $J = 7.1$  Hz), 86.66. HRMS (ESI-TOF)  $m/z$  Calcd for  $C_{13}H_8IF_2N_3$   $[M+H]^+$ : 371.9804, found: 371.9813.

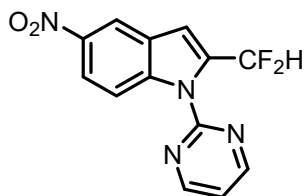

2-(Difluoromethyl)-5-nitro-1-(pyrimidin-2-yl)-1*H*-indole (**3n**)

Light yellow solid,  $^1H$  NMR (400 MHz,  $CDCl_3$ )  $\delta$  8.84 (d,  $J = 4.8$  Hz, 2H), 8.79 (d,  $J = 9.3$  Hz, 1H), 8.62 (d,  $J = 2.2$  Hz, 1H), 8.28 (dd,  $J = 9.3, 2.3$  Hz, 1H), 7.80 (t,  $J = 55.5$  Hz, 1H), 7.34 – 7.27 (m, 2H).  $^{19}F$  NMR (376 MHz,  $CDCl_3$ )  $\delta$  -114.79 (s, 2F).  $^{13}C$  NMR (101 MHz,  $CDCl_3$ )  $\delta$  158.55, 157.15, 143.73, 140.25, 136.43, 127.80, 120.41, 118.41, 118.30, 116.32, 110.13 (t,  $J = 237.7$  Hz), 109.91 (t,  $J = 6.9$  Hz). HRMS (ESI-TOF)  $m/z$  Calcd for  $C_{13}H_8F_2N_4O_2$   $[M+H]^+$ : 291.0688, found: 291.0675.

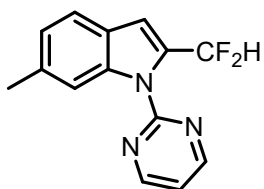

2-(Difluoromethyl)-6-methyl-1-(pyrimidin-2-yl)-1*H*-indole (**3o**)

White solid,  $^1H$  NMR (400 MHz,  $CDCl_3$ )  $\delta$  8.76 (d,  $J = 4.8$  Hz, 2H), 8.48 (s, 1H), 7.78 (t,  $J = 56.3$  Hz, 1H), 7.55 (d,  $J = 8.0$  Hz, 1H), 7.18 – 7.02 (m, 3H), 2.53 (s, 3H).  $^{19}F$  NMR (376 MHz,  $CDCl_3$ )  $\delta$  -113.76 (s, 2F).  $^{13}C$  NMR (101 MHz,  $CDCl_3$ )  $\delta$  158.19, 157.78, 137.83, 135.48, 132.68 (t,  $J = 28.9$  Hz), 125.98, 124.48, 121.36, 117.04, 115.72, 110.87 (t,  $J = 236.4$  Hz), 109.23 (t,  $J = 6.9$

Hz). HRMS (ESI-TOF)  $m/z$  Calcd for  $C_{14}H_{11}F_2N_3$   $[M+H]^+$ : 260.0994, found: 260.0975.

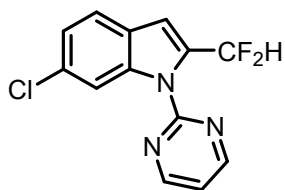

6-Chloro-2-(difluoromethyl)-1-(pyrimidin-2-yl)-1*H*-indole (**3p**)

White solid,  $^1H$  NMR (400 MHz,  $CDCl_3$ )  $\delta$  8.77 (d,  $J = 4.8$  Hz, 2H), 8.75 (d,  $J = 1.6$  Hz, 1H), 7.77 (t,  $J = 55.9$  Hz, 1H), 7.57 (d,  $J = 8.4$  Hz, 1H), 7.30 – 7.23 (m, 1H), 7.18 (t,  $J = 4.8$  Hz, 1H), 7.10 (s, 1H).  $^{19}F$  NMR (376 MHz,  $CDCl_3$ )  $\delta$  -114.12 (s, 2F).  $^{13}C$  NMR (101 MHz,  $CDCl_3$ )  $\delta$  158.30, 157.46, 137.68, 133.98 (t,  $J = 29.1$  Hz), 131.27, 126.69, 123.55, 122.49, 117.50, 116.23, 110.53 (t,  $J = 236.7$  Hz), 109.05 (t,  $J = 6.9$  Hz). HRMS (ESI-TOF)  $m/z$  Calcd for  $C_{13}H_8ClF_2N_3$   $[M+H]^+$ : 280.0448, found: 280.0427.

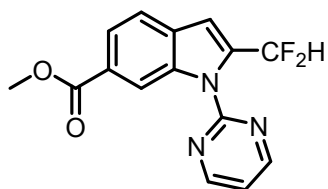

Methyl 2-(difluoromethyl)-1-(pyrimidin-2-yl)-1*H*-indole-6-carboxylate (**3q**)

White solid,  $^1H$  NMR (400 MHz,  $CDCl_3$ )  $\delta$  9.35 (s, 1H), 8.82 (d,  $J = 4.8$  Hz, 2H), 8.01 – 7.62 (m, 3H), 7.21 (t,  $J = 4.8$  Hz, 1H), 7.16 (s, 1H), 3.97 (s, 3H).  $^{19}F$  NMR (376 MHz,  $CDCl_3$ )  $\delta$  -114.29 (s, 2F).  $^{13}C$  NMR (101 MHz,  $CDCl_3$ )  $\delta$  167.90, 158.46, 157.42, 136.85, 136.10 (t,  $J = 29.1$  Hz), 131.74, 126.99, 123.80, 121.52, 118.08, 117.71, 110.42 (t,  $J = 237.0$  Hz), 108.86 (t,  $J = 6.8$  Hz), 52.35. HRMS (ESI-TOF)  $m/z$  Calcd for  $C_{15}H_{11}F_2N_3O_2$   $[M+H]^+$ : 304.0892, found: 304.0881.

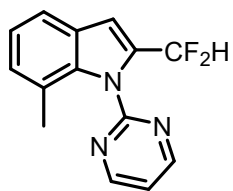

2-(Difluoromethyl)-7-methyl-1-(pyrimidin-2-yl)-1*H*-indole (**3r**)

White solid,  $^1H$  NMR (400 MHz,  $CDCl_3$ )  $\delta$  8.86 (d,  $J = 4.8$  Hz, 2H), 7.55 (d,  $J = 7.7$  Hz, 1H), 7.39 – 7.30 (m, 1H), 7.23 – 7.05 (m, 3H), 7.04 (s, 1H), 2.09 (s, 3H).  $^{19}F$  NMR (376 MHz,  $CDCl_3$ )  $\delta$  -114.44 (s, 2F).  $^{13}C$  NMR (101 MHz,  $CDCl_3$ )  $\delta$  158.66, 157.79, 137.05, 133.18 (t,  $J = 27.9$  Hz), 128.40, 127.86, 123.28, 122.45, 119.92, 119.32, 110.32 (t,  $J = 236.2$  Hz), 107.37 (t,  $J = 5.8$  Hz), 20.88. HRMS (ESI-TOF)  $m/z$  Calcd for  $C_{14}H_{11}F_2N_3$   $[M+H]^+$ : 260.0994, found: 260.0979.

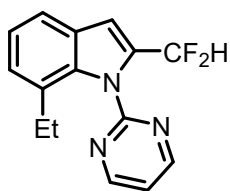

2-(Difluoromethyl)-7-ethyl-1-(pyrimidin-2-yl)-1*H*-indole (**3s**)

White solid,  $^1\text{H}$  NMR (400 MHz,  $\text{CDCl}_3$ )  $\delta$  8.85 (d,  $J = 4.8$  Hz, 2H), 7.57 – 7.55 (m, 1H), 7.34 (d,  $J = 4.7$  Hz, 1H), 7.32 – 7.17 (m, 3H), 7.06 (d,  $J = 6.1$  Hz, 1H), 2.47 (q,  $J = 7.5$  Hz, 2H), 0.98 (t,  $J = 7.5$  Hz, 3H).  $^{19}\text{F}$  NMR (376 MHz,  $\text{CDCl}_3$ )  $\delta$  -114.56 (s, 2F).  $^{13}\text{C}$  NMR (101 MHz,  $\text{CDCl}_3$ )  $\delta$  158.69, 158.18, 136.32, 133.34 (t,  $J = 28.0$  Hz), 129.49, 128.63, 125.68, 122.59, 119.96, 119.42, 110.35 (t,  $J = 236.1$  Hz), 107.49 (t,  $J = 5.9$  Hz), 26.46, 13.80. HRMS (ESI-TOF)  $m/z$  Calcd for  $\text{C}_{15}\text{H}_{13}\text{F}_2\text{N}_3$   $[\text{M}+\text{H}]^+$ : 274.1150, found: 274.1132.

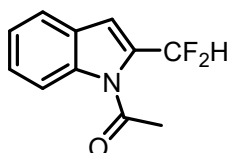

1-(2-(Difluoromethyl)-1*H*-indol-1-yl) ethan-1-one (**3t**)

White solid,  $^1\text{H}$  NMR (400 MHz,  $\text{CDCl}_3$ )  $\delta$  7.74 (d,  $J = 8.5$  Hz, 1H), 7.66 (d,  $J = 7.7$  Hz, 1H), 7.54 – 7.22 (m, 3H), 7.12 (s, 1H), 2.85 (s, 3H).  $^{19}\text{F}$  NMR (376 MHz,  $\text{CDCl}_3$ )  $\delta$  -113.55 (s, 2F).  $^{13}\text{C}$  NMR (101 MHz,  $\text{CDCl}_3$ )  $\delta$  169.37, 136.19, 134.31 (t,  $J = 28.9$  Hz), 128.96, 126.23, 123.81, 122.88, 114.39, 111.73 (t,  $J = 7.3$  Hz), 110.16 (t,  $J = 236.8$  Hz), 27.05. HRMS (ESI-TOF)  $m/z$  Calcd for  $\text{C}_{11}\text{H}_9\text{F}_2\text{NO}$   $[\text{M}+\text{H}]^+$ : 210.0725, found: 210.0709.

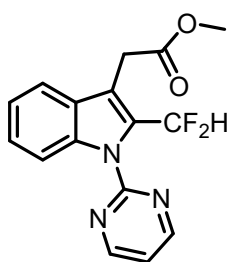

Methyl 2-(2-(difluoromethyl)-1-(pyrimidin-2-yl)-1*H*-indol-3-yl) acetate (**3u**)

White solid,  $^1\text{H}$  NMR (400 MHz,  $\text{CDCl}_3$ )  $\delta$  8.77 (d,  $J = 4.8$  Hz, 2H), 8.53 (d,  $J = 8.5$  Hz, 1H), 7.86 (t,  $J = 54.4$  Hz, 1H), 7.64 (d,  $J = 7.8$  Hz, 1H), 7.40 (t,  $J = 8.3$  Hz, 1H), 7.31 (t,  $J = 8.0$  Hz, 1H), 7.15 (t,  $J = 4.8$  Hz, 1H), 4.08 (t,  $J = 2.1$  Hz, 2H), 3.72 (s, 3H).  $^{19}\text{F}$  NMR (376 MHz,  $\text{CDCl}_3$ )  $\delta$  -111.19 (s, 2F).  $^{13}\text{C}$  NMR (101 MHz,  $\text{CDCl}_3$ )  $\delta$  171.49, 158.32, 157.64, 136.43, 129.79 – 128.47 (m), 125.82, 122.85, 119.53, 117.44, 115.81 (t,  $J = 2.5$  Hz), 115.36, 111.87 (t,  $J = 235.9$  Hz), 52.31,

30.22 (t,  $J = 3.3$  Hz). HRMS (ESI-TOF)  $m/z$  Calcd for  $C_{16}H_{13}F_2N_3O_2$   $[M+H]^+$ : 318.1049, found: 318.1033.

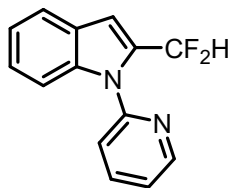

2-(Difluoromethyl)-1-(pyridin-2-yl)-1H-indole (**3v**)

Light yellow oily substance,  $^1H$  NMR (400 MHz,  $CDCl_3$ )  $\delta$  8.60 (d,  $J = 3.4$  Hz, 1H), 8.44 – 8.26 (m, 1H), 7.87 (td,  $J = 8.1, 1.9$  Hz, 1H), 7.80 (d,  $J = 3.5$  Hz, 1H), 7.50 (d,  $J = 8.2$  Hz, 1H), 7.37 – 7.31 (m, 2H), 7.23 (dd,  $J = 7.1, 5.1$  Hz, 1H), 6.96 (t,  $J = 56.0$  Hz, 1H), 6.93 (d,  $J = 2.8$  Hz, 1H).  $^{19}F$  NMR (376 MHz,  $CDCl_3$ )  $\delta$  -110.52 (s, 2F).  $^{13}C$  NMR (101 MHz,  $CDCl_3$ )  $\delta$  152.10, 148.93, 138.75, 135.60, 127.21, 126.01 (t,  $J = 22.4$  Hz), 122.63, 121.43, 120.62, 119.93 – 118.13 (m), 115.70, 115.45 (t,  $J = 237.5$  Hz), 114.94, 103.75. HRMS (ESI-TOF)  $m/z$  Calcd for  $C_{14}H_{10}F_2N_2$   $[M+H]^+$ : 245.0885, found: 245.0876.

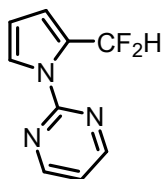

2-(2-(Difluoromethyl)-1H-pyrrol-1-yl)pyrimidine (**3w**)

White solid,  $^1H$  NMR (400 MHz,  $CDCl_3$ )  $\delta$  8.66 (d,  $J = 4.8$  Hz, 2H), 7.91 (d,  $J = 1.1$  Hz, 1H), 7.66 (s, 1H), 7.13 (t,  $J = 4.8$  Hz, 1H), 6.75 (s, 1H), 6.32 (s, 1H).  $^{19}F$  NMR (376 MHz,  $CDCl_3$ )  $\delta$  -111.61 (s, 2F).  $^{13}C$  NMR (101 MHz,  $CDCl_3$ )  $\delta$  158.45, 156.53, 127.50, 123.35, 117.85, 114.95 – 113.86 (m), 110.47 (t,  $J = 232$  Hz), 110.46. HRMS (ESI-TOF)  $m/z$  Calcd for  $C_9H_7F_2N_3$   $[M+H]^+$ : 196.0681, found: 196.0673.

## 2.5 Scale-up synthesis of **3a**

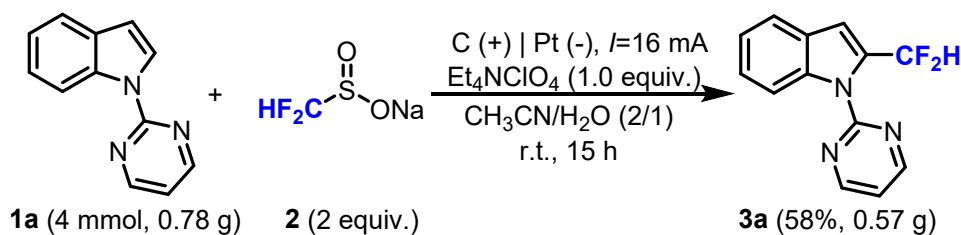

A 250 mL three-necked bottle was charged with substrate **1a** (4 mmol, 0.78 g), **2** (8 mmol, 1.10 g),  $Et_4NClO_4$  (4 mmol, 0.92 g),  $CH_3CN/H_2O$  (120 mL,  $v/v = 2/1$ ) and a magnetic stir bar. The

bottle was equipped with platinum electrodes (20 mm × 20 mm × 0.1 mm) as a cathode and a graphite rod (Φ6 mm × 90 mm) as an anode. The whole cell was an undivided cell. The reaction mixture was stirred and electrolyzed at a constant current of 16 mA without a reference electrode under room temperature for 15 h. After completion of the reaction, it was monitored with TLC. Then, the reaction mixtures were washed by H<sub>2</sub>O and extracted with DCM (3×30 mL). The organic layer was dried over anhydrous Na<sub>2</sub>SO<sub>4</sub> and concentrated *in vacuo*, and the resulting residue was purified by flash column chromatography using EtOAc/*n*-hexane (1:4) as the eluent to afford the product **3a** in 58% yield.

## 2.6 Derivatization of product **3a**

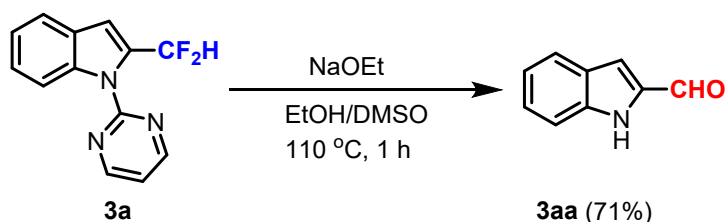

To a solution of 2-(difluoromethyl)-1-(pyrimidin-2-yl)-1*H*-indole **3a** (0.5 mmol, 1.0 eq) in DMSO (2.0 mL) was added NaOEt (1.5 mmol, 3.0 eq) (20% wt. in EtOH) at room temperature under Ar atmosphere. After the mixture was stirred at 110 °C for 1 h, saturated aq. NH<sub>4</sub>Cl was added at room temperature. Then the reaction mixture was diluted with EtOAc (15 mL) and washed with H<sub>2</sub>O (3 × 15 mL). The aqueous layer was extracted with EtOAc (3 × 15 mL). The combined organic layer was dried over Na<sub>2</sub>SO<sub>4</sub> and concentrated *in vacuo*. The residue was purified by flash column chromatography using EtOAc/hexanes (1:10) as eluent to afford the desired product **3aa** in 71% yield.

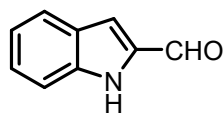

1*H*-indole-2-carbaldehyde (**3aa**)

White solid, <sup>1</sup>H NMR (400 MHz, CDCl<sub>3</sub>) δ 9.86 (s, 1H), 9.38 (s, 1H), 7.76 (d, *J* = 8.7 Hz, 1H), 7.48 (d, *J* = 9.1 Hz, 1H), 7.41 (d, *J* = 7.1 Hz, 1H), 7.30 (s, 1H), 7.19 (t, *J* = 8.0 Hz, 1H). <sup>13</sup>C NMR (101 MHz, CDCl<sub>3</sub>) δ 182.36, 138.18, 136.03, 127.49, 127.41, 123.56, 121.38, 115.14, 112.64. HRMS (ESI-TOF) *m/z* Calcd for C<sub>9</sub>H<sub>8</sub>NO [M+H]<sup>+</sup>: 146.0600, found: 146.0612.

## 2.7 Cyclic voltammetry (CV) experiments

Cyclic voltammograms of **1a**, **2** and **BHT** were performed in a three-electrode cell connected

to a schlenk line under nitrogen at room temperature. The working electrode was a steady glassy carbon disk electrode while the counter electrode was a platinum wire. The reference was an Ag/AgCl electrode submerged in saturated aqueous KCl solution. (1) **1a** (0.2 mmol) and a mixed solvent CH<sub>3</sub>CN/H<sub>2</sub>O (6 mL, v/v=2/1) containing Et<sub>4</sub>NClO<sub>4</sub> (0.2 mmol) were poured into the electrochemical cell in cyclic voltammetry experiments. The scan rate was 0.10 V/s, ranging from 0 V to 2.5 V. (2) **2** (0.4 mmol) and a mixed solvent CH<sub>3</sub>CN/H<sub>2</sub>O (6 mL, v/v=2/1) containing Et<sub>4</sub>NClO<sub>4</sub> (0.2 mmol) were poured into the electrochemical cell in cyclic voltammetry experiments. The scan rate was 0.10 V/s, ranging from 0 V to 2.5 V. (3) **BHT** (0.6 mmol) and a mixed solvent CH<sub>3</sub>CN/H<sub>2</sub>O (6 mL, v/v=2/1) containing Et<sub>4</sub>NClO<sub>4</sub> (0.2 mmol) were poured into the electrochemical cell in cyclic voltammetry experiments. The scan rate was 0.10 V/s, ranging from 0 V to 2.5 V. (4) **TEMPO** (0.6 mmol) and a mixed solvent CH<sub>3</sub>CN/H<sub>2</sub>O (6 mL, v/v=2/1) containing Et<sub>4</sub>NClO<sub>4</sub> (0.2 mmol) were poured into the electrochemical cell in cyclic voltammetry experiments. The scan rate was 0.10 V/s, ranging from 0 V to 2.5 V. (5) A mixed solvent CH<sub>3</sub>CN/H<sub>2</sub>O (6 mL, v/v=2/1) containing Et<sub>4</sub>NClO<sub>4</sub> (0.2 mmol) were poured into the electrochemical cell in cyclic voltammetry experiments. The scan rate was 0.10 V/s, ranging from 0 V to 2.5 V.

## 2.8 Free radical trapping experiment

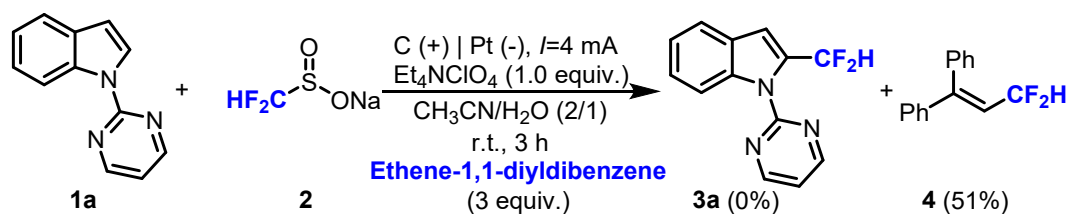

A 50 mL vial was charged with substrate **1a** (0.2 mmol, 1.0 equiv.), **2** (0.4 mmol, 2.0 equiv.), Et<sub>4</sub>NClO<sub>4</sub> (0.2 mmol, 1.0 equiv.), Ethene-1,1-diyldibenzene (0.6 mmol, 3.0 equiv.), CH<sub>3</sub>CN/H<sub>2</sub>O (6 mL, v/v = 2/1) and a magnetic stir bar. The vial was equipped with a graphite rod (Φ 6 mm) as an anode and platinum electrodes (10 mm × 10 mm × 0.1 mm) as cathode. The whole cell was an undivided cell. The reaction mixture was stirred and electrolyzed at a constant current of 4 mA without a reference electrode under room temperature for 3 h (2.24 F mol<sup>-1</sup>). The whole reaction process was monitored with TLC. The results showed that the formation of **3a** was complete inhibited, and the difluoromethyl radical was captured by ethene-1,1-diyldibenzene to form the compound **4** in 51% yield.

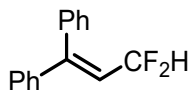

(3,3-Difluoroprop-1-ene-1,1-diyl) dibenzene (**4**)

Light yellow oily substance,  $^1\text{H}$  NMR (400 MHz,  $\text{CDCl}_3$ )  $\delta$  7.41 (q,  $J = 3.7$  Hz, 3H), 7.37 – 7.31 (m, 3H), 7.31 – 7.27 (m, 2H), 7.26 – 7.19 (m, 2H), 6.35 – 5.76 (m, 2H).  $^{19}\text{F}$  NMR (376 MHz,  $\text{CDCl}_3$ )  $\delta$  -106.65.  $^{13}\text{C}$  NMR (101 MHz,  $\text{CDCl}_3$ )  $\delta$  150.78 (t,  $J = 12.9$  Hz), 140.18, 137.37, 129.94, 129.17, 128.82, 128.60, 128.56, 128.16, 120.19 (t,  $J = 26.7$  Hz), 113.88 (t,  $J = 229.4$  Hz). HRMS (ESI-TOF)  $m/z$  Calcd for  $\text{C}_{15}\text{H}_{12}\text{F}_2$   $[\text{M}+\text{Na}]^+$ : 253.0799, found: 253.0787.

### 3. Reference

[1] L. Ackermann and A. V. Lygin, *Org. Lett.*, 2011, **13**, 3332-3335.

#### 4. $^1\text{H}$ NMR, $^{19}\text{F}$

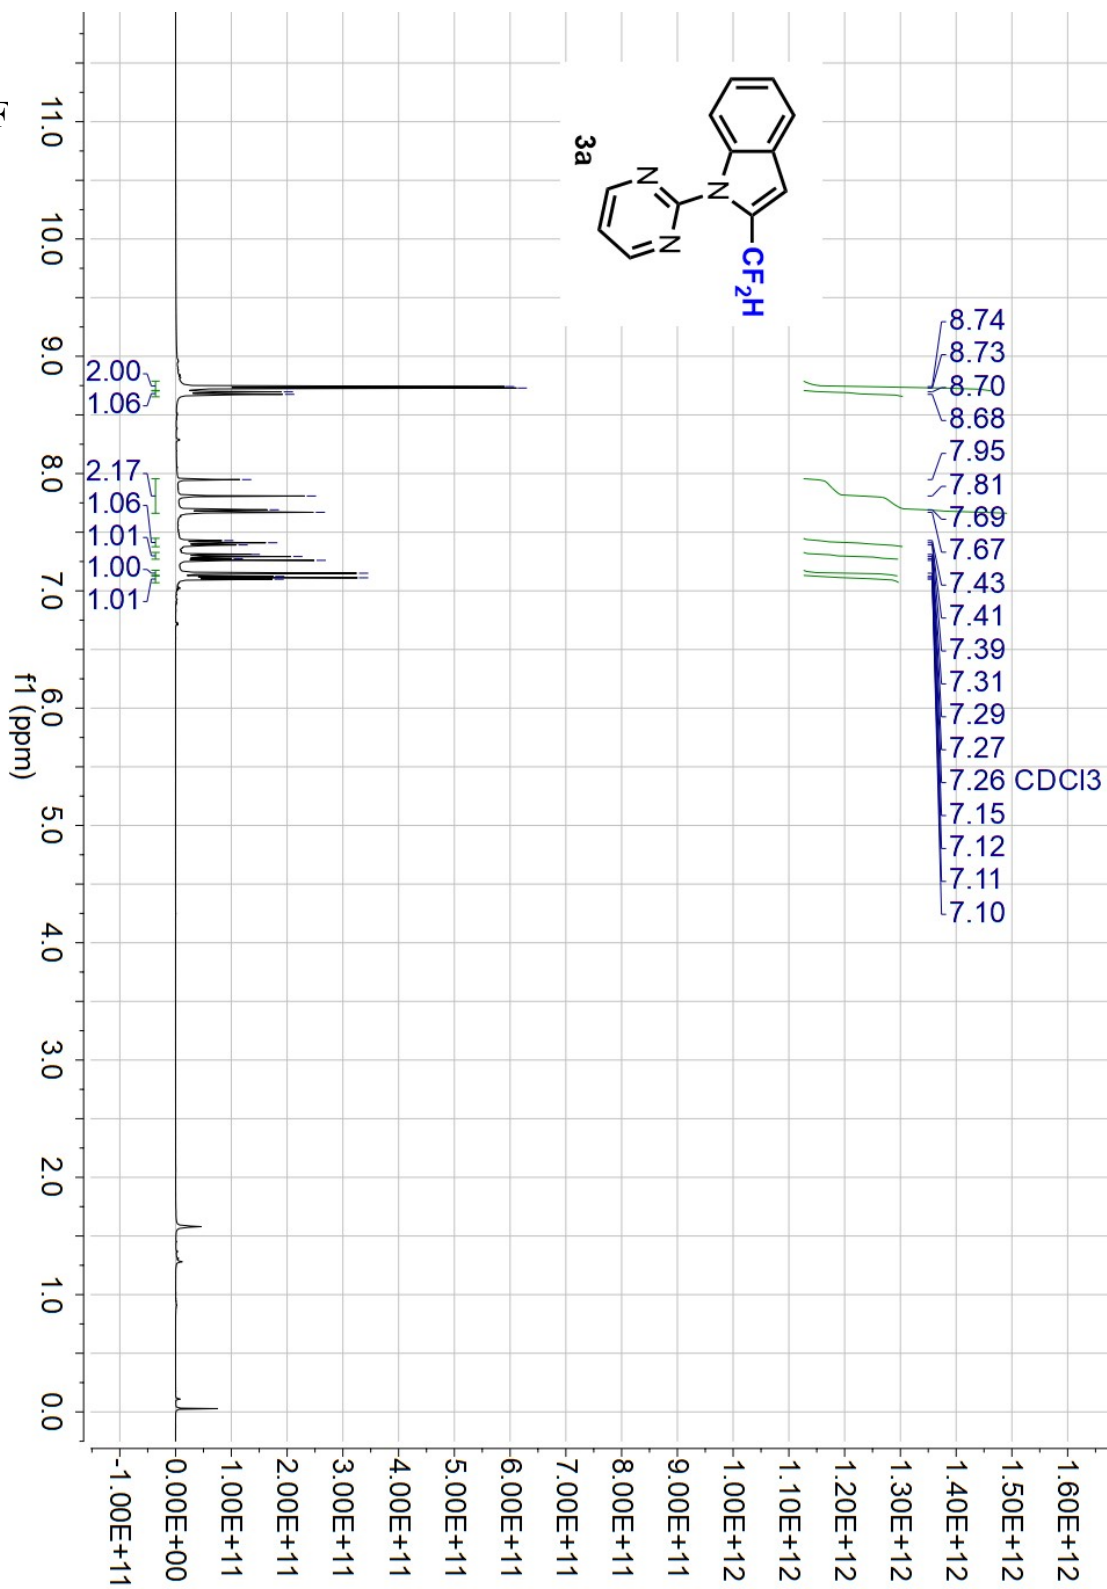



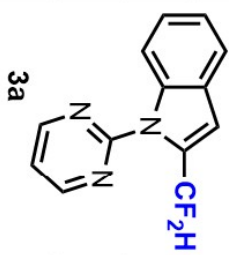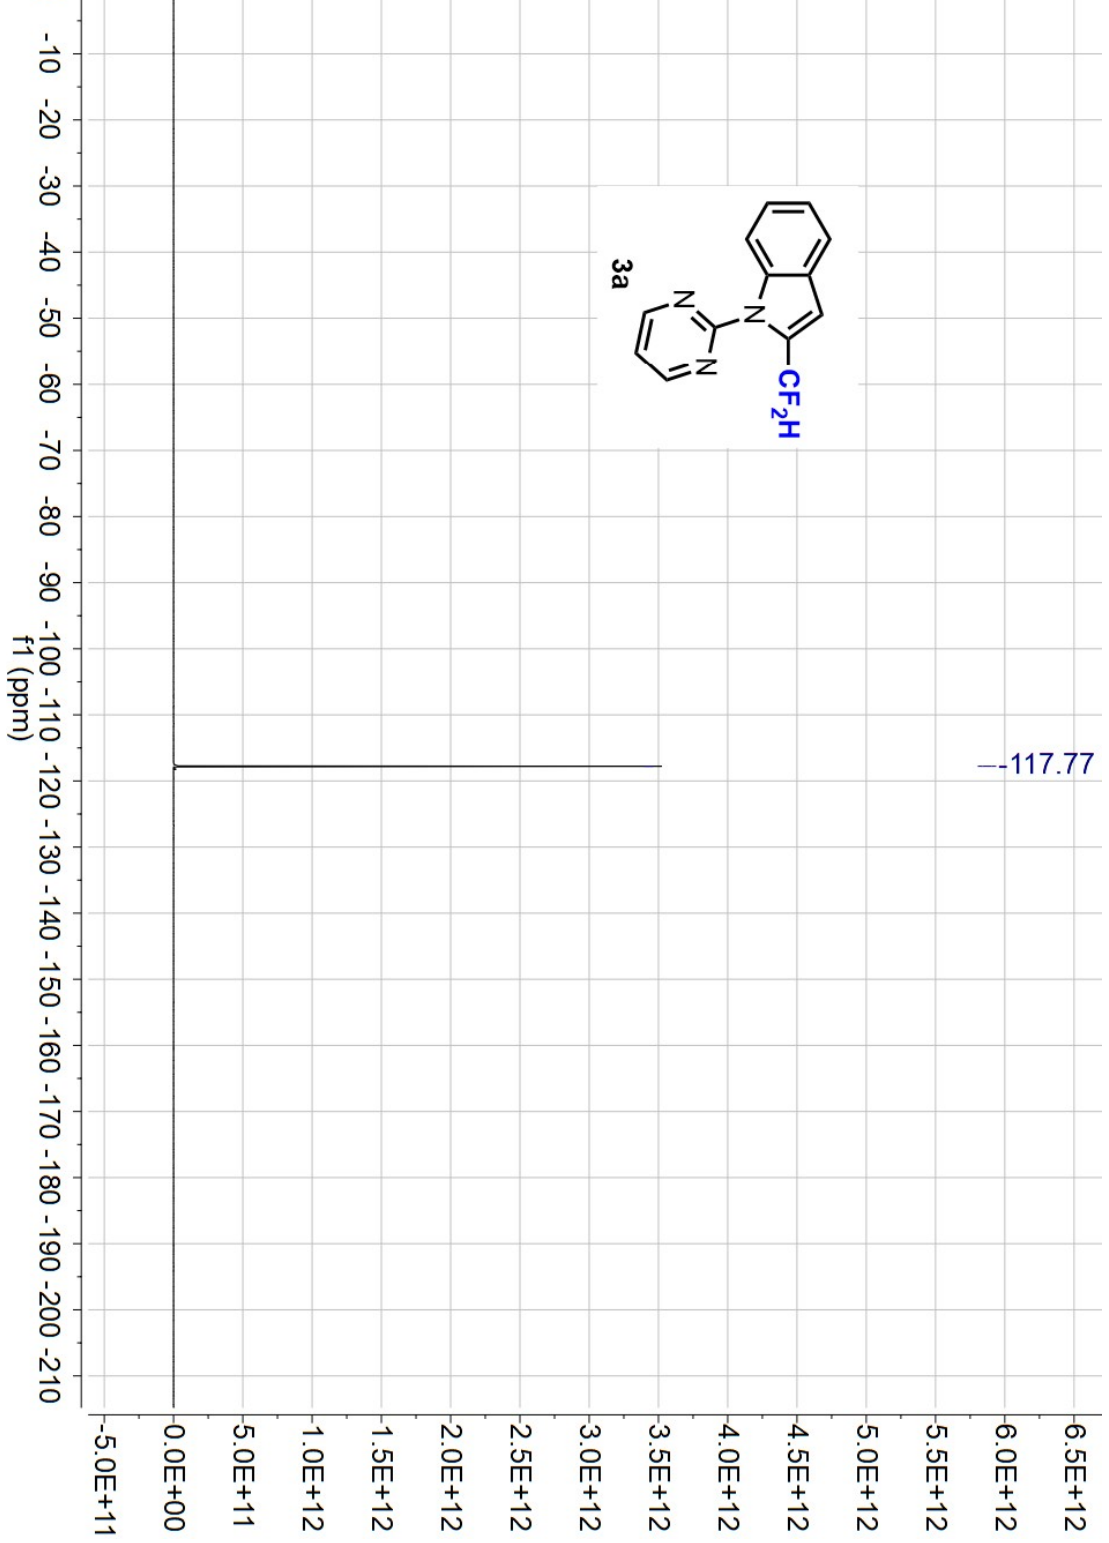

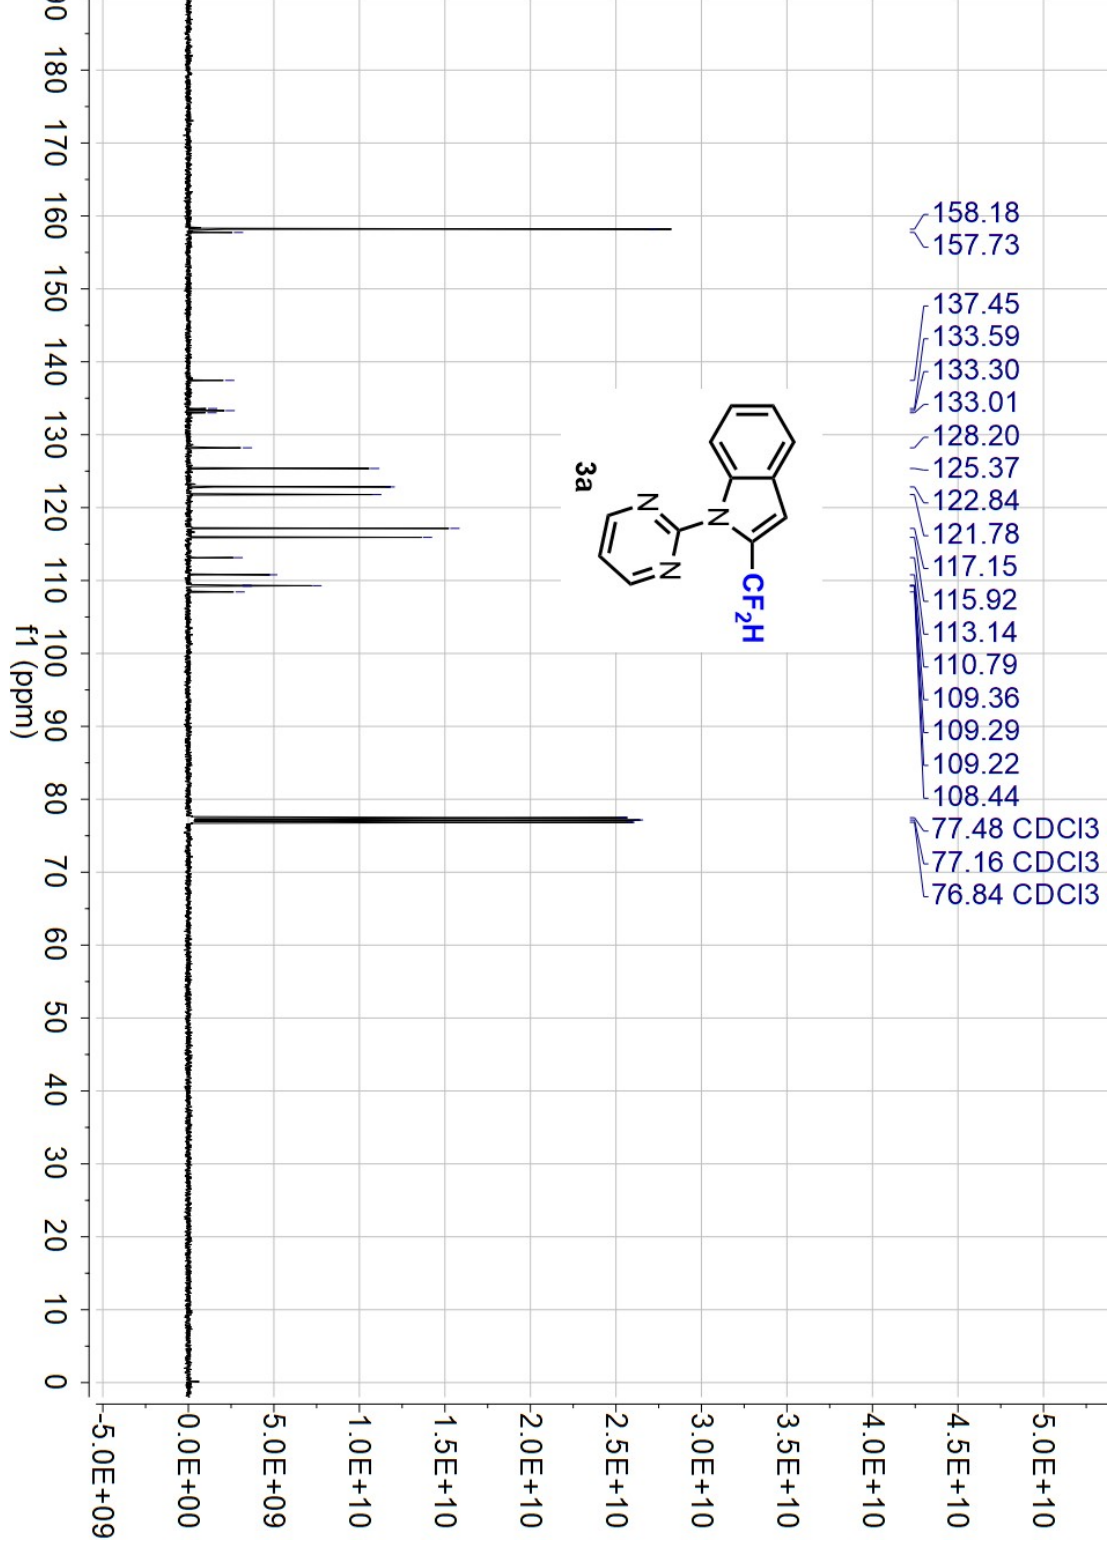

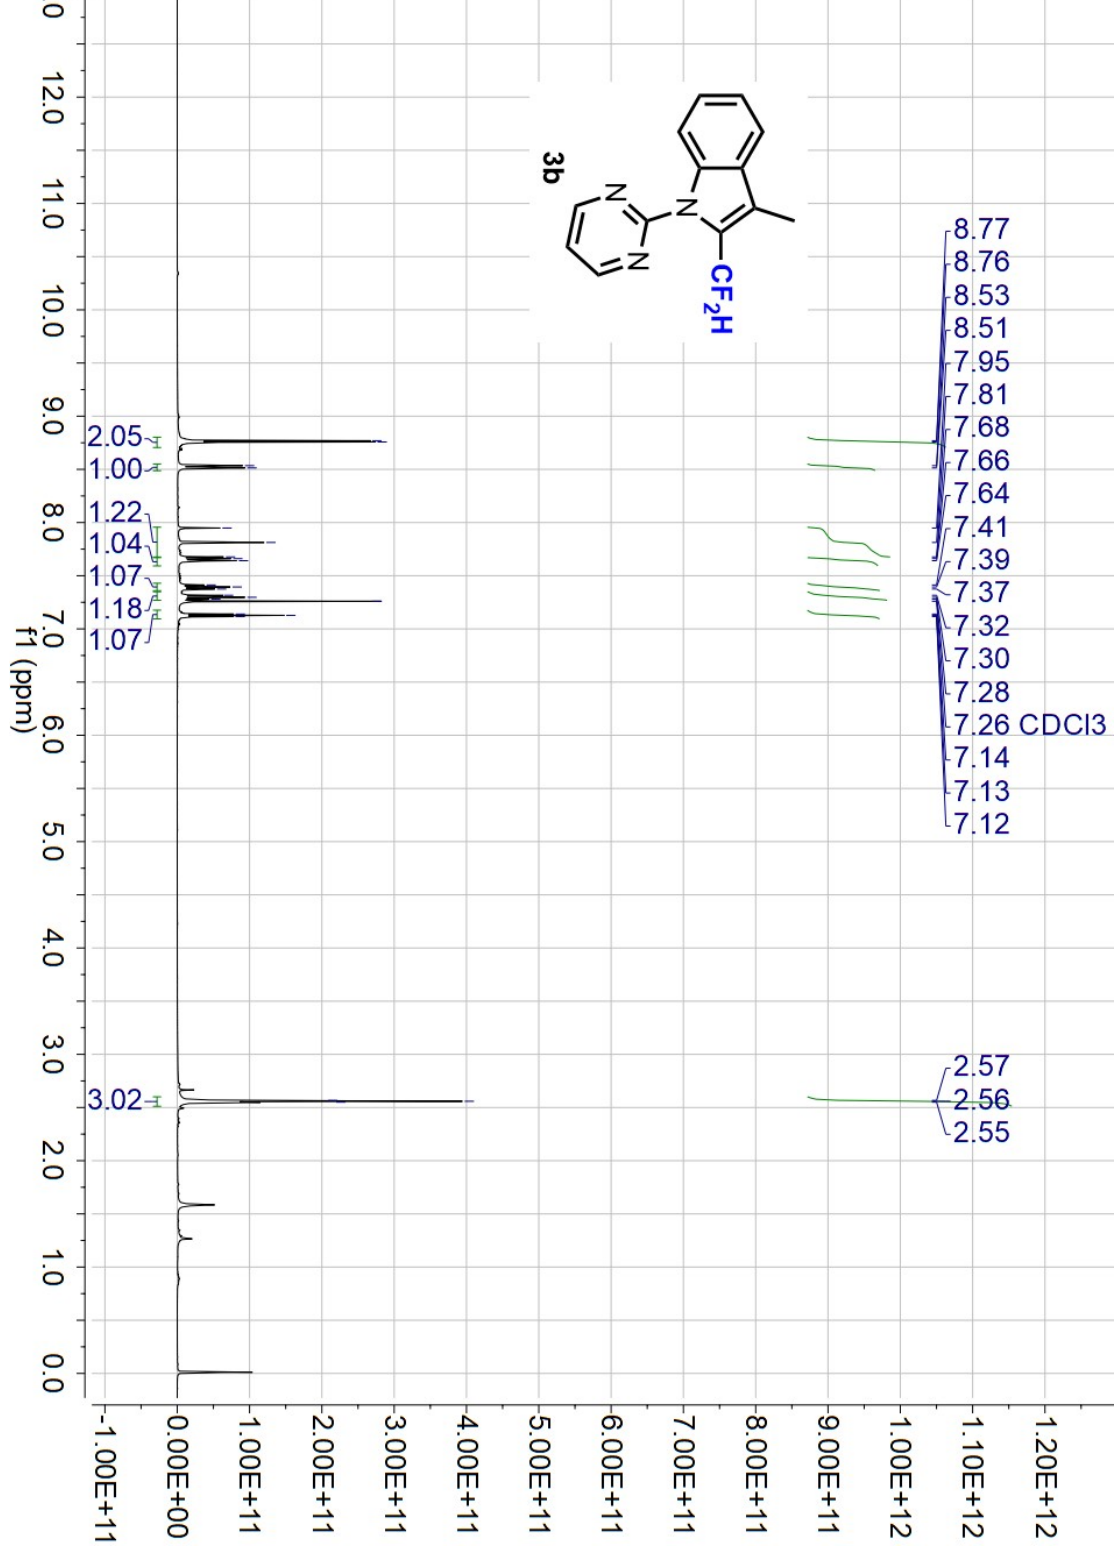

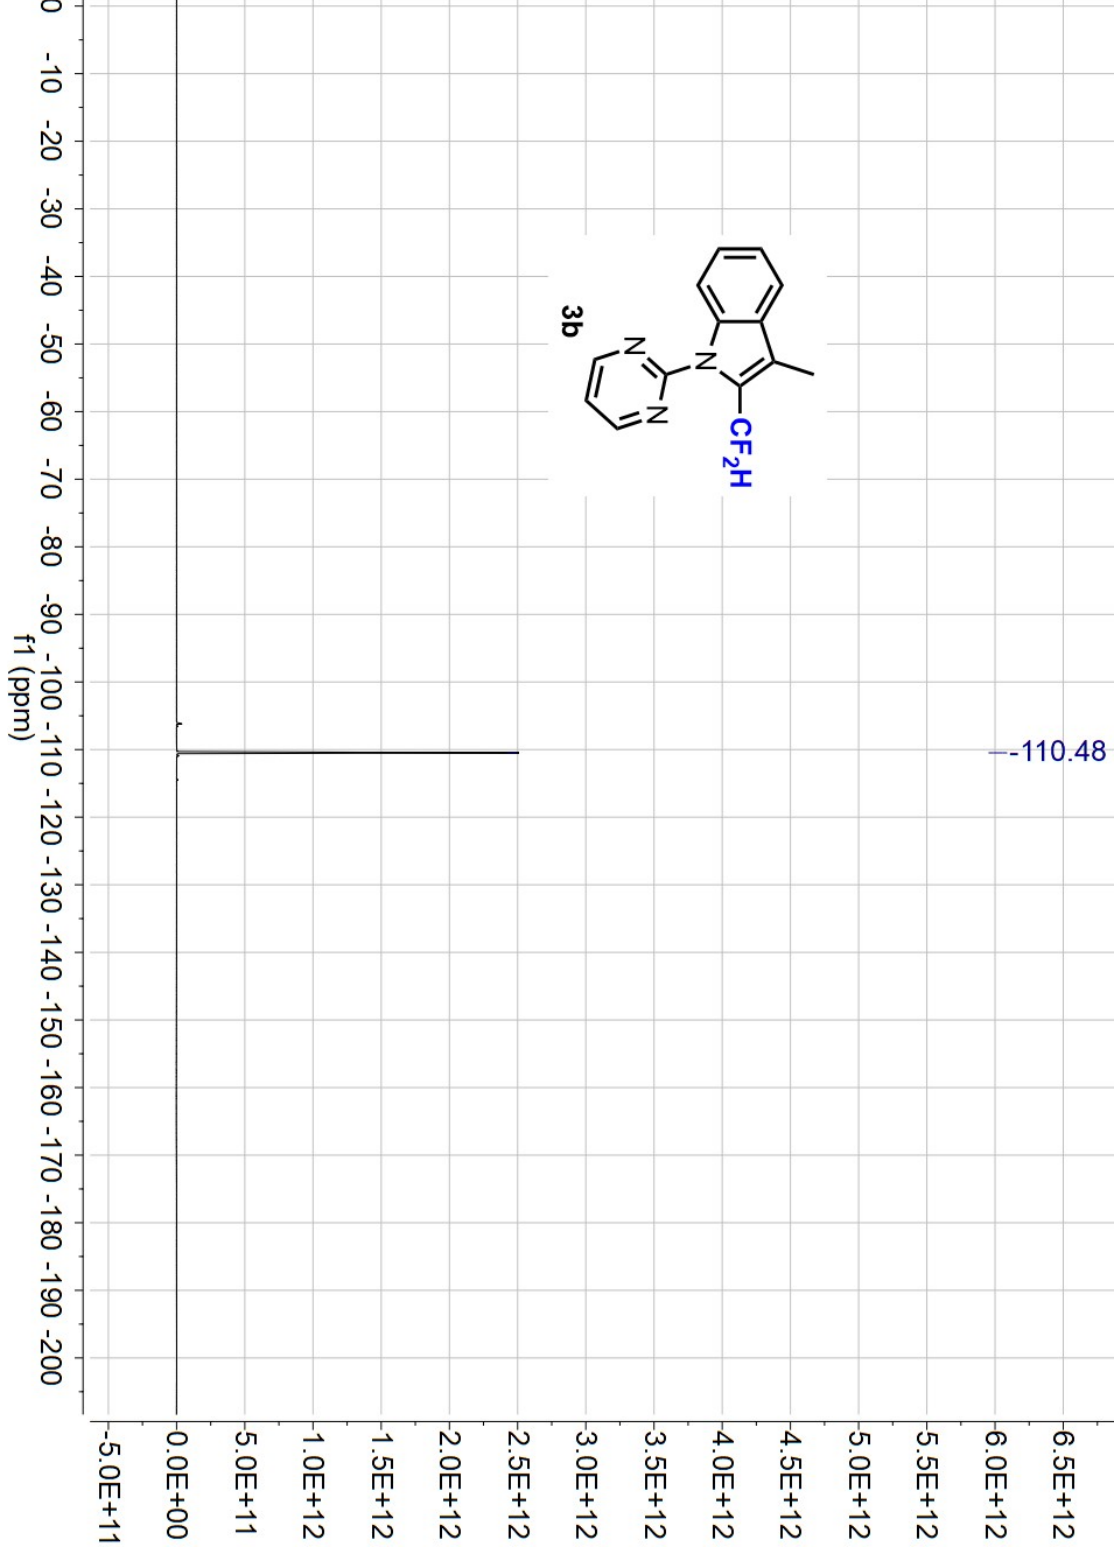

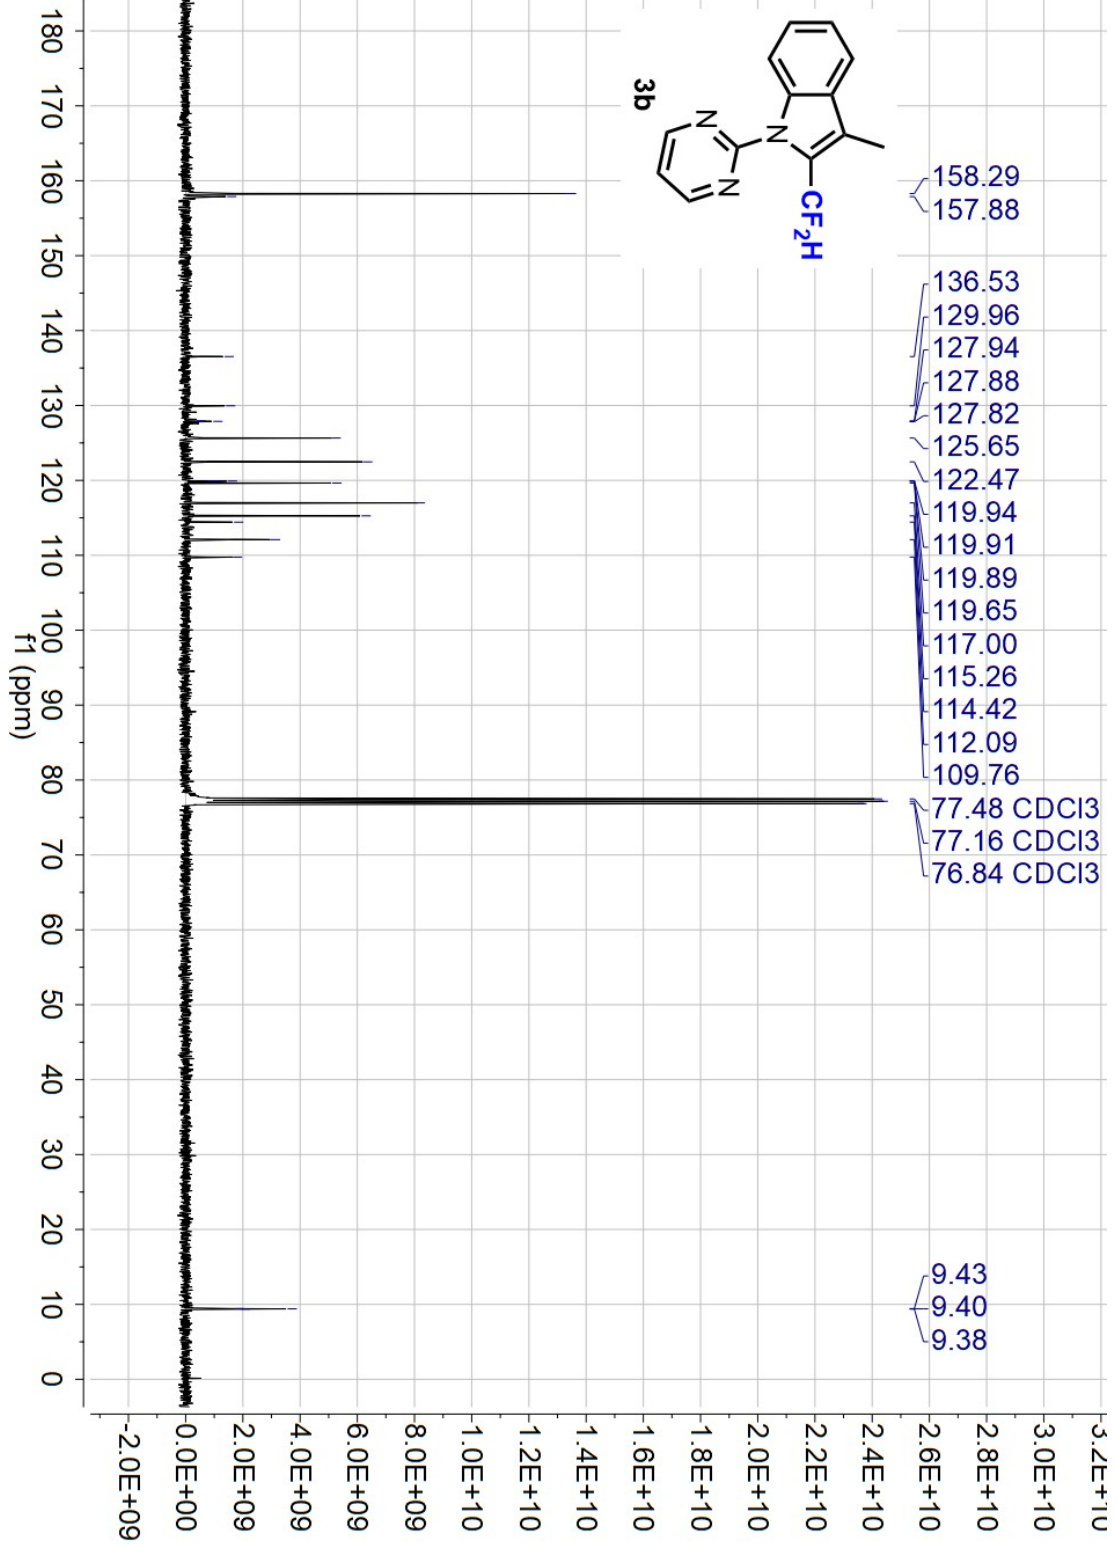

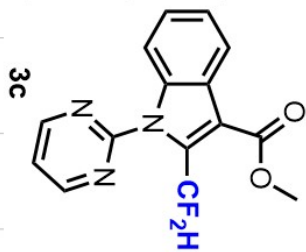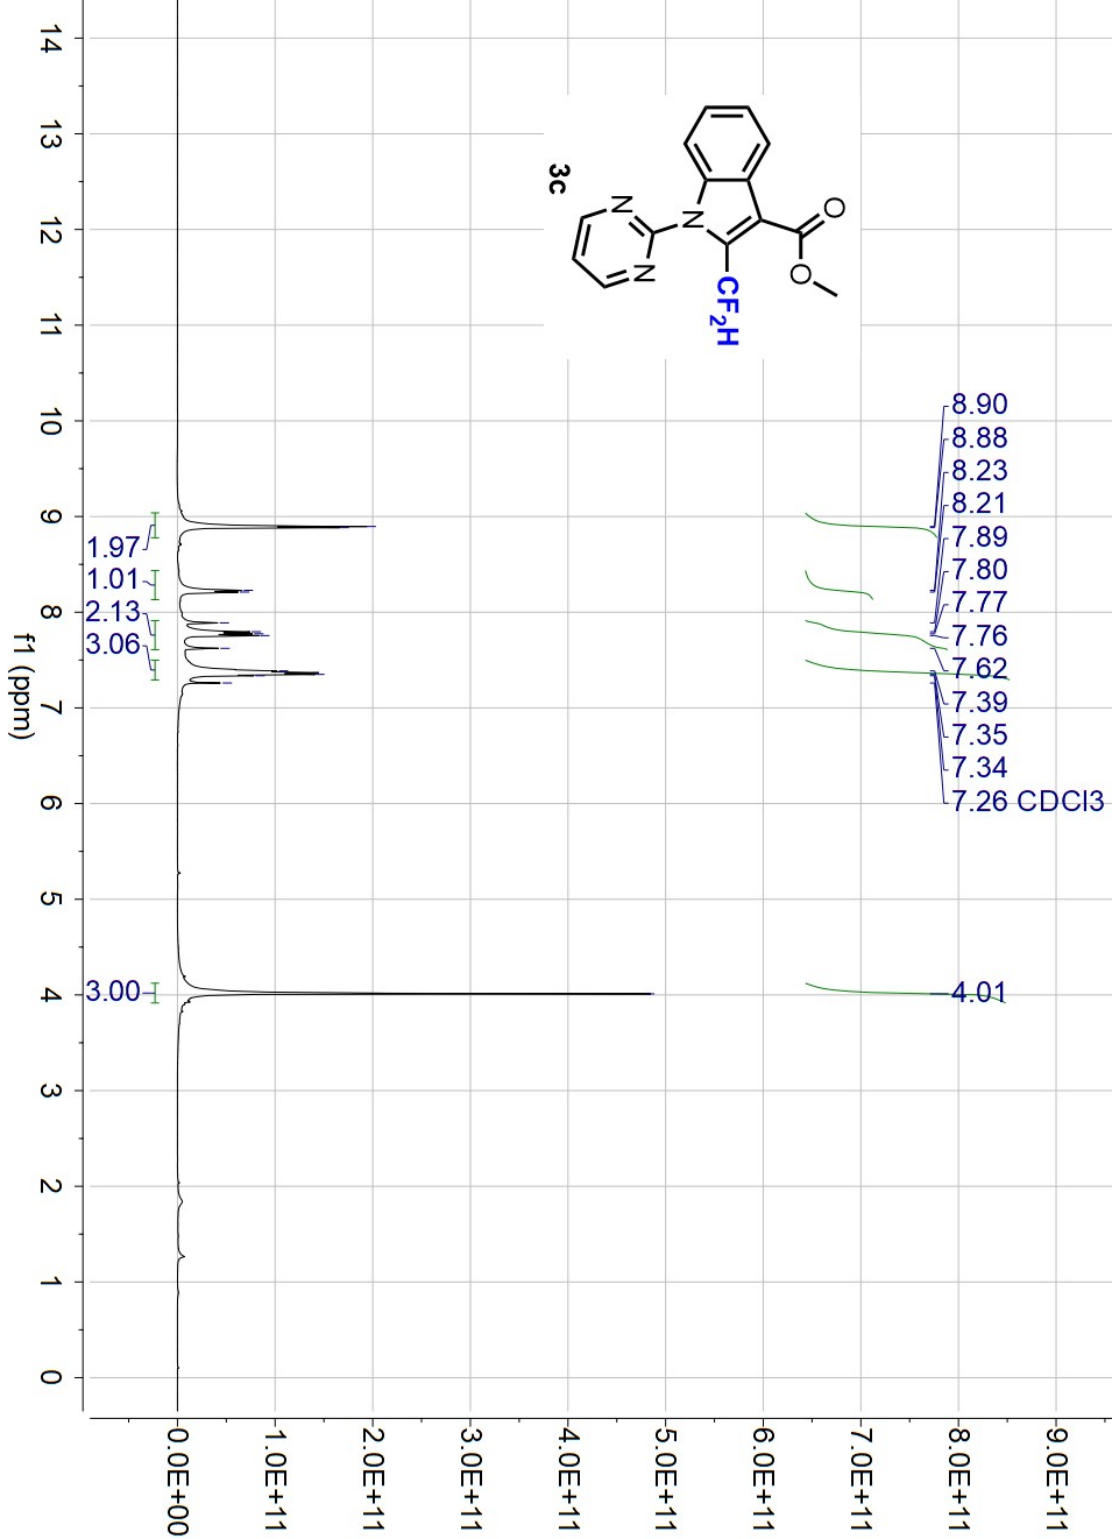

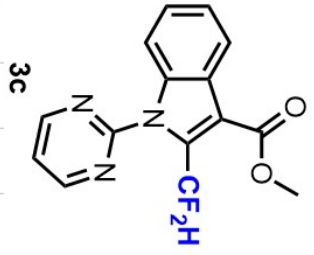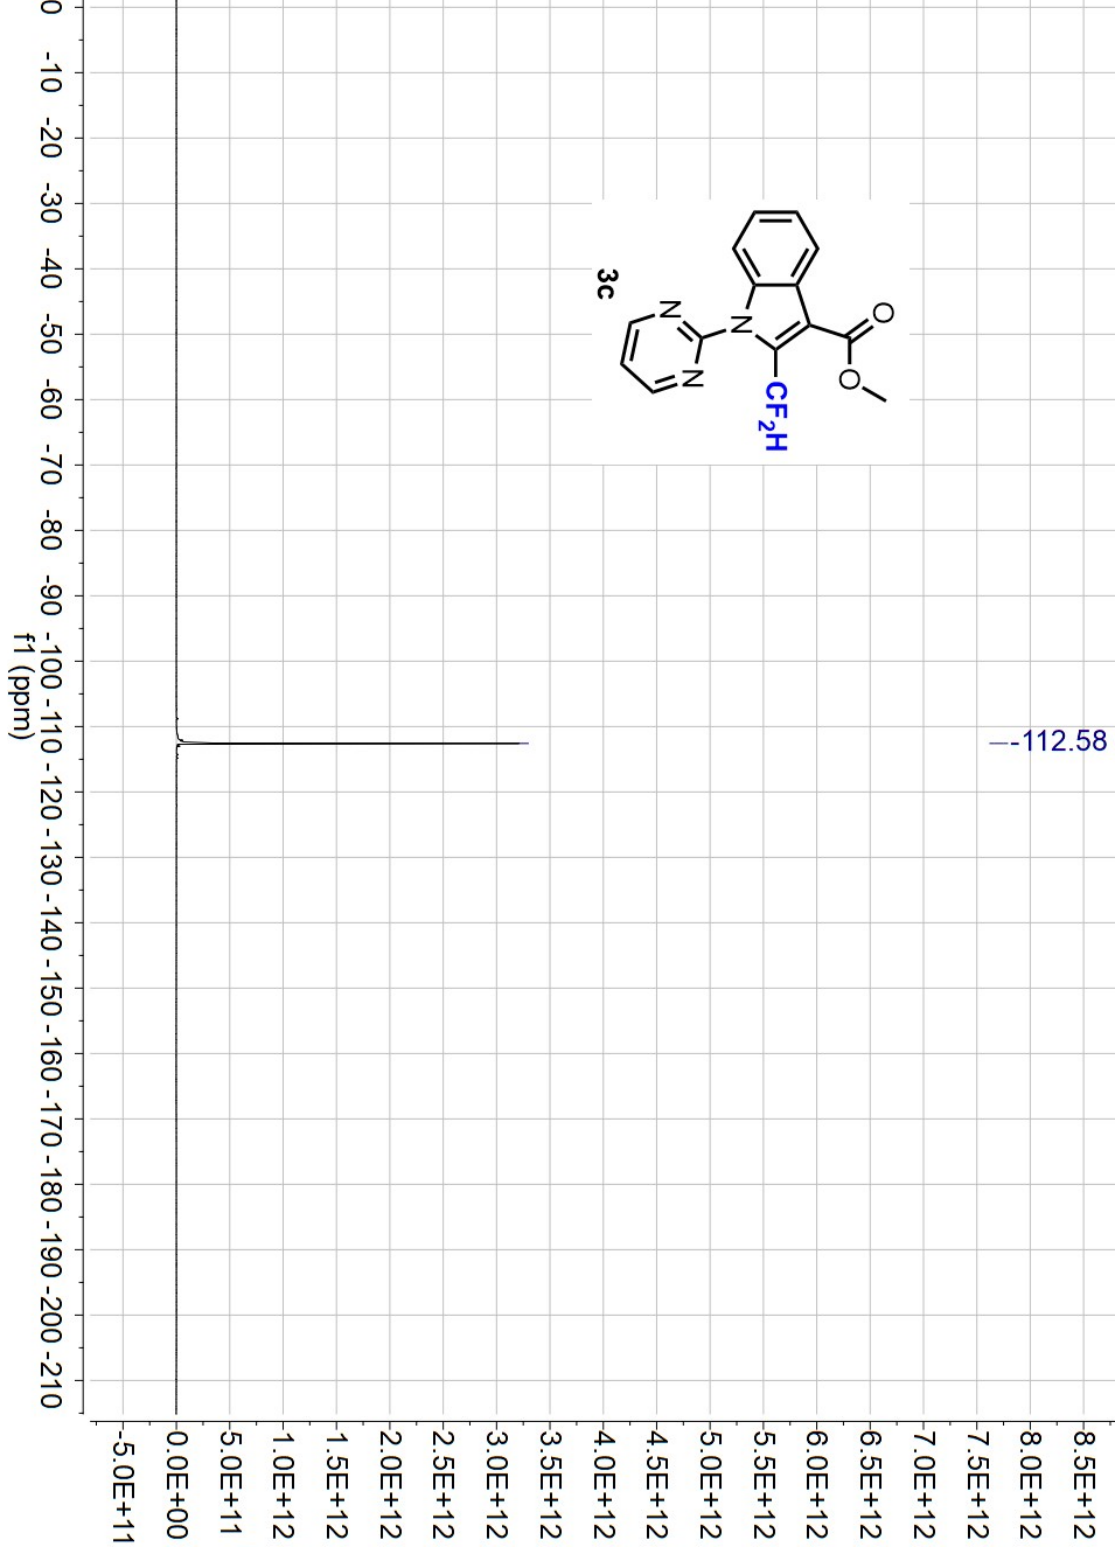

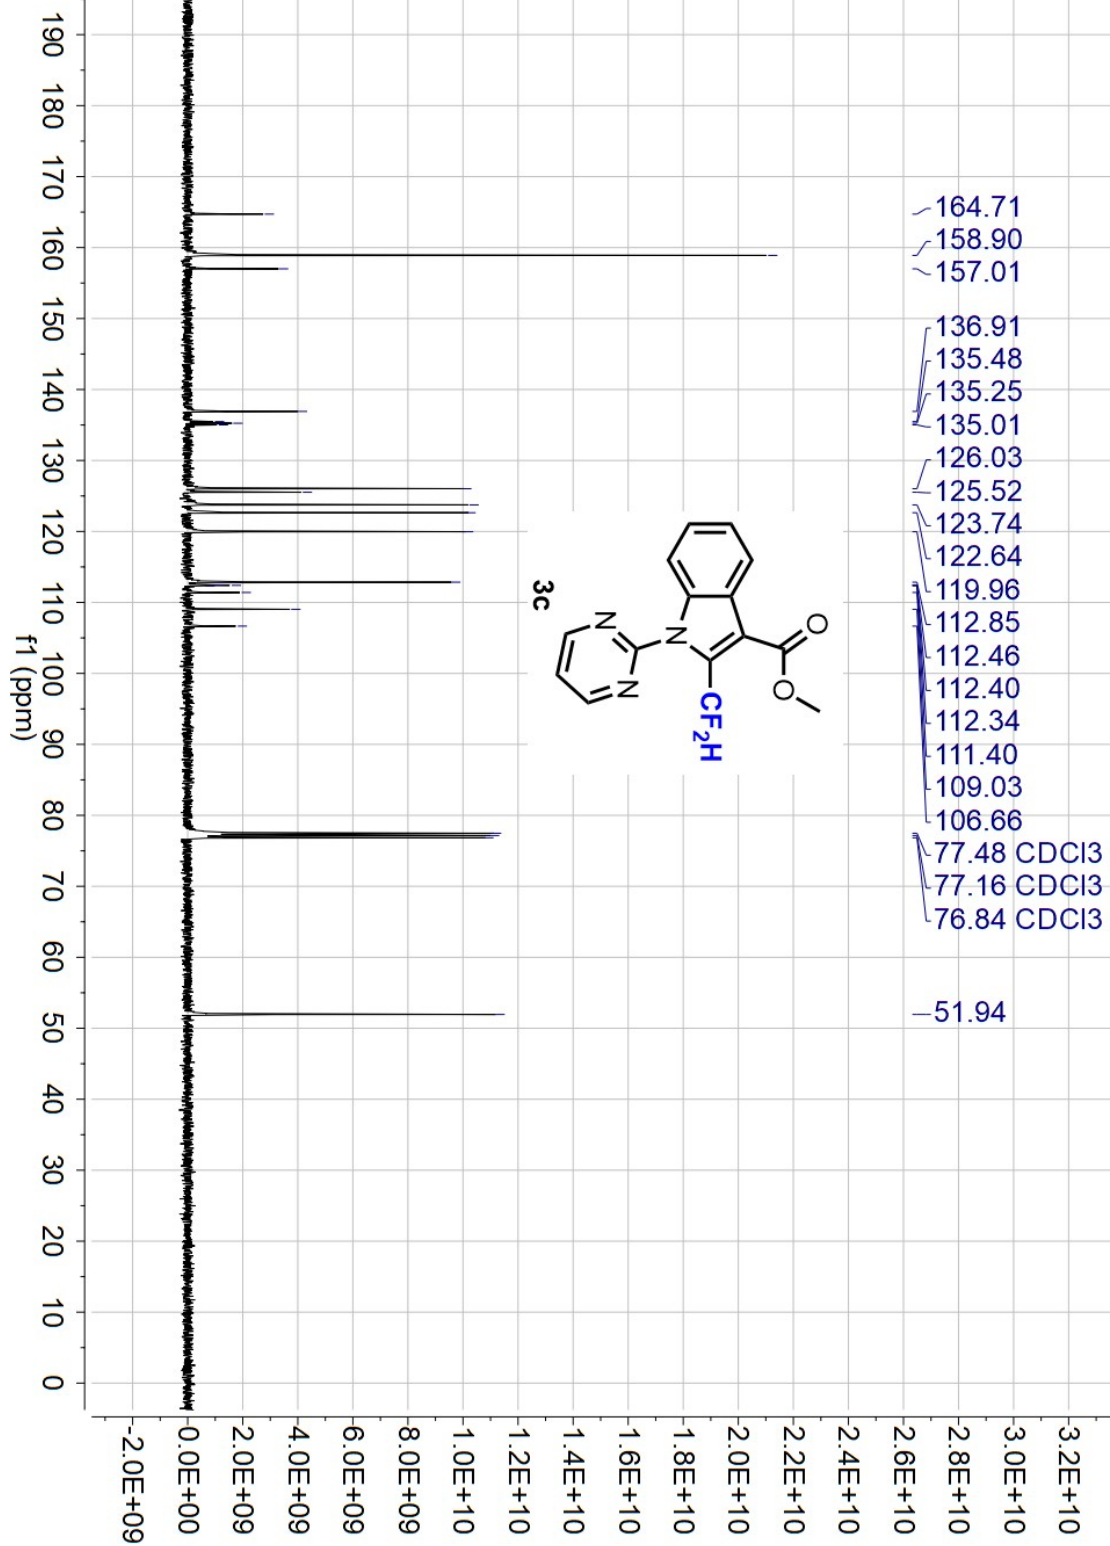



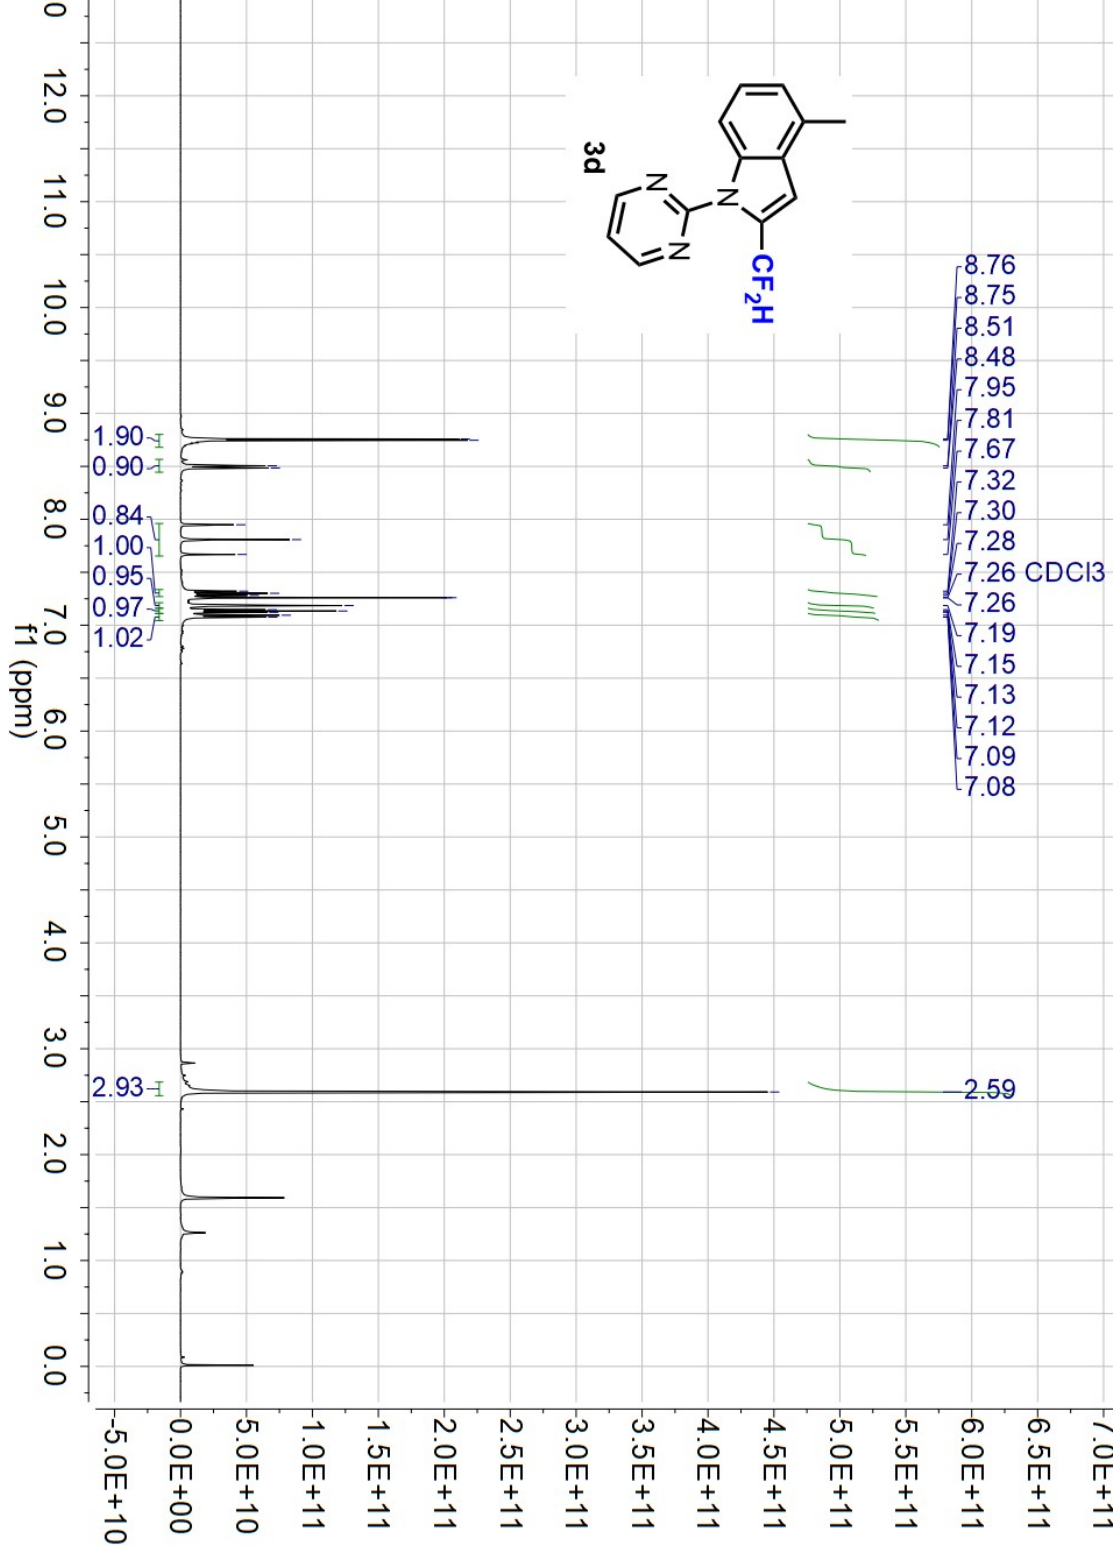

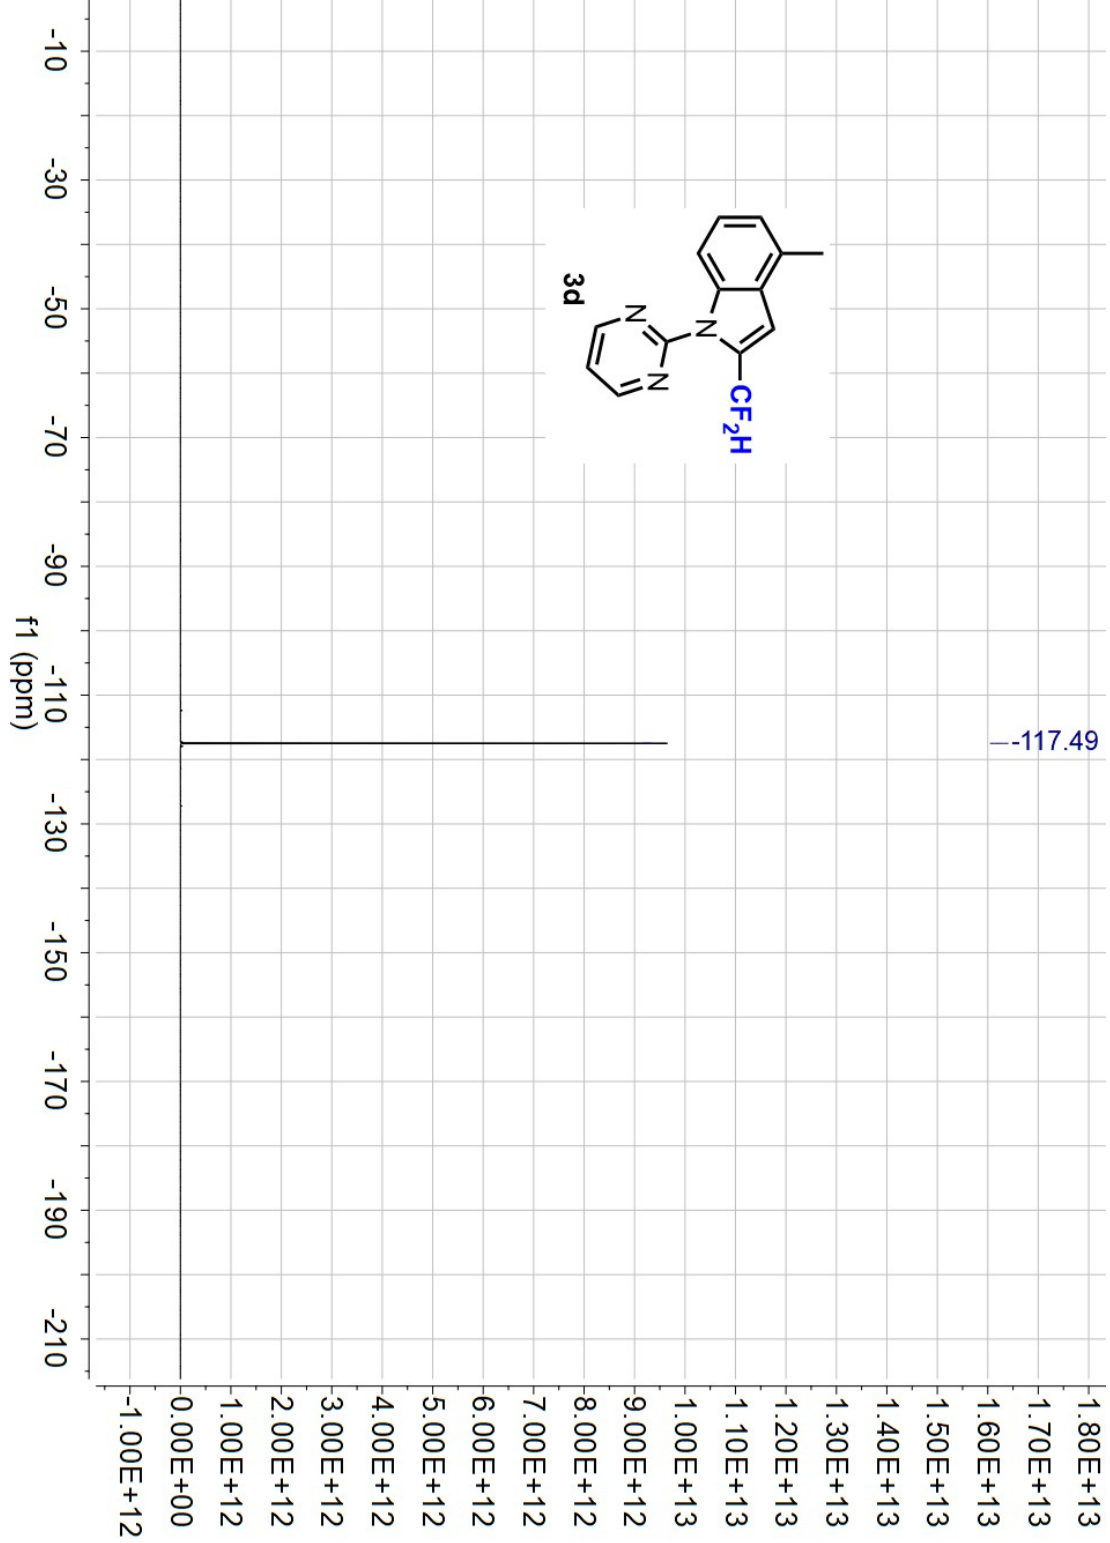

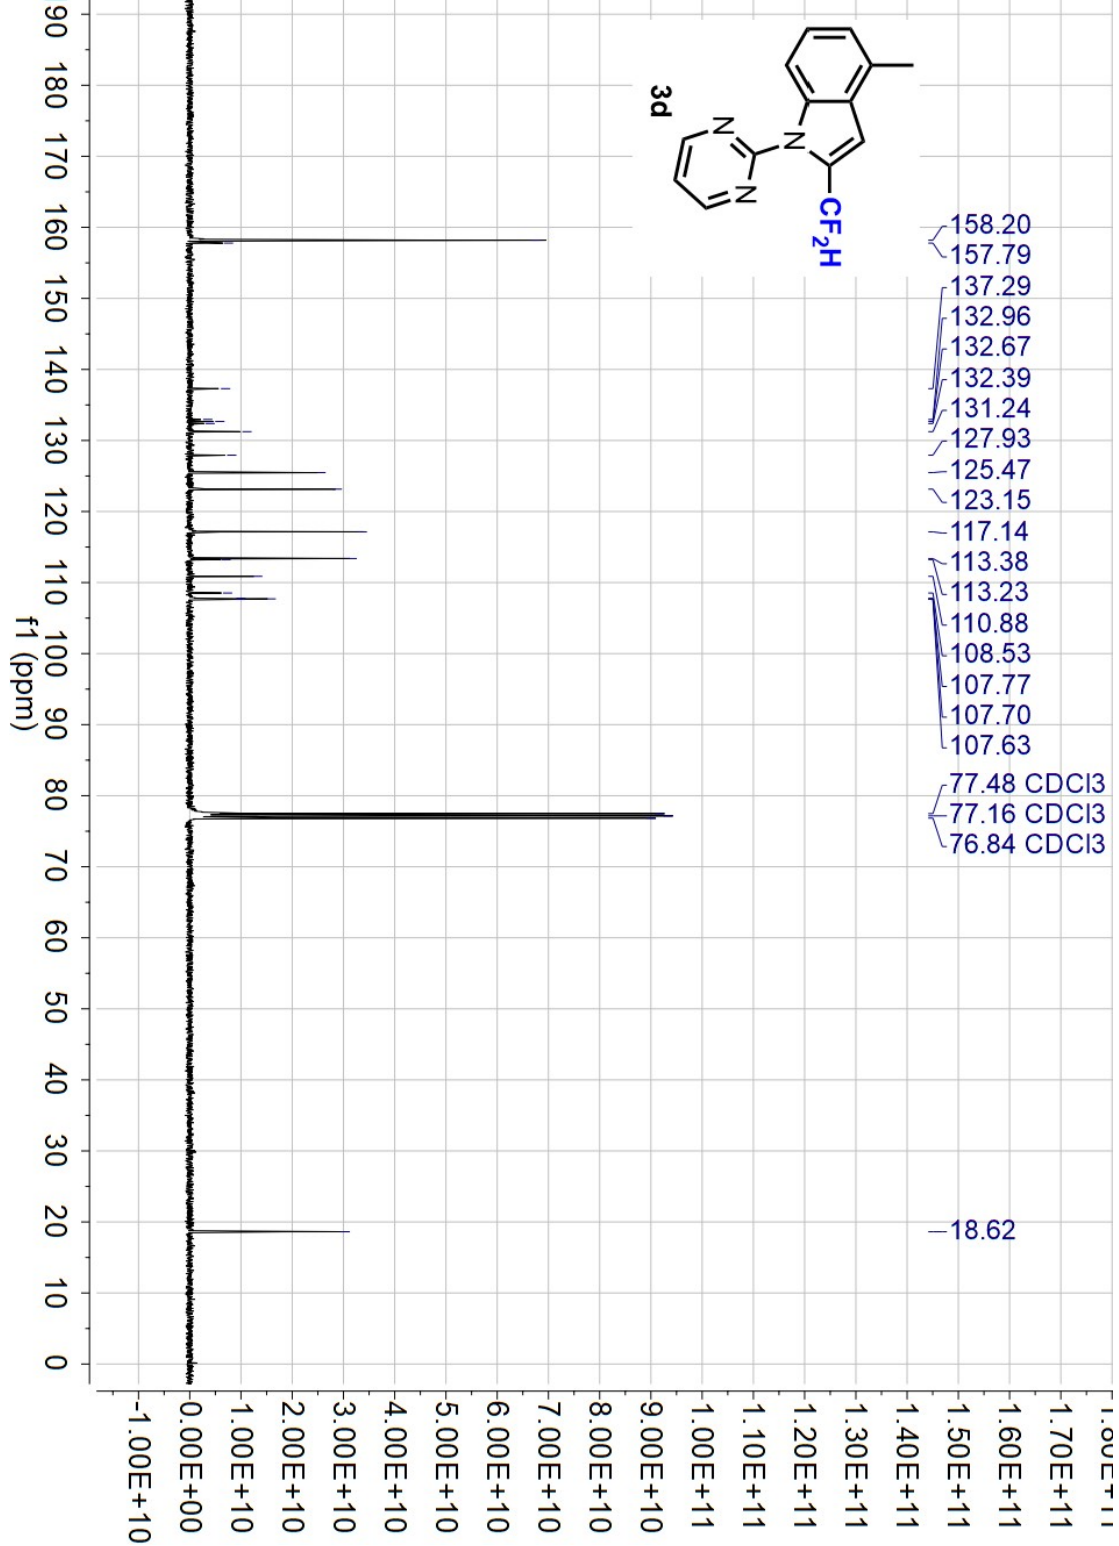

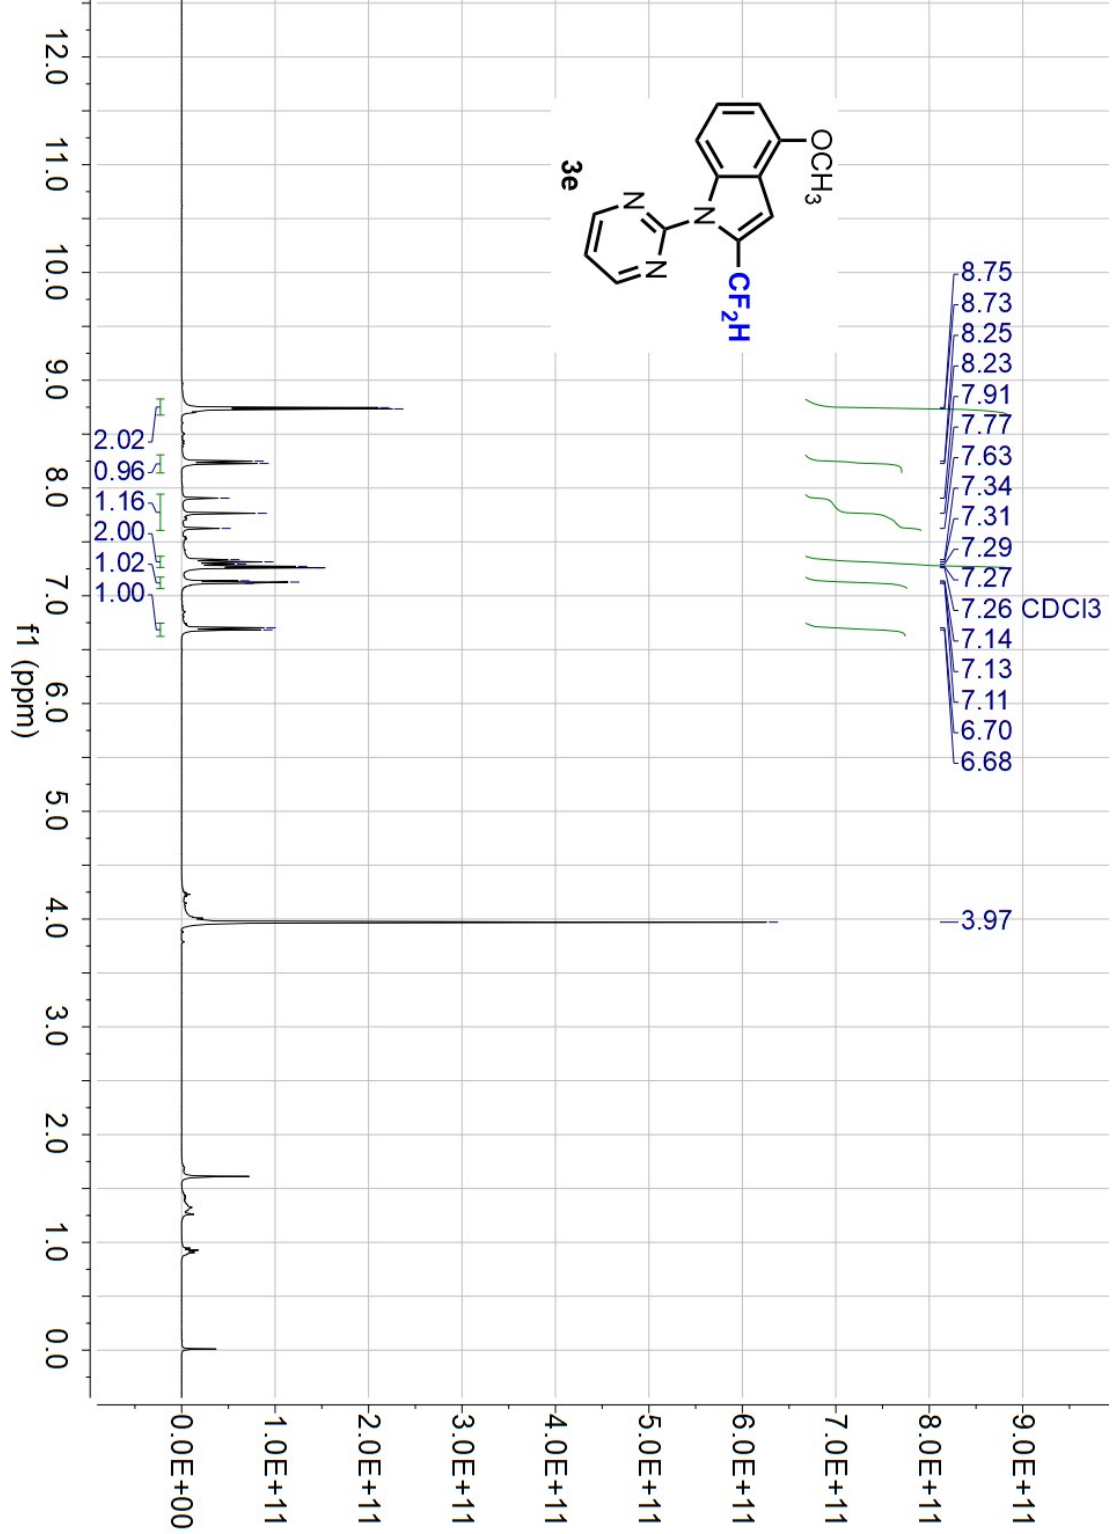

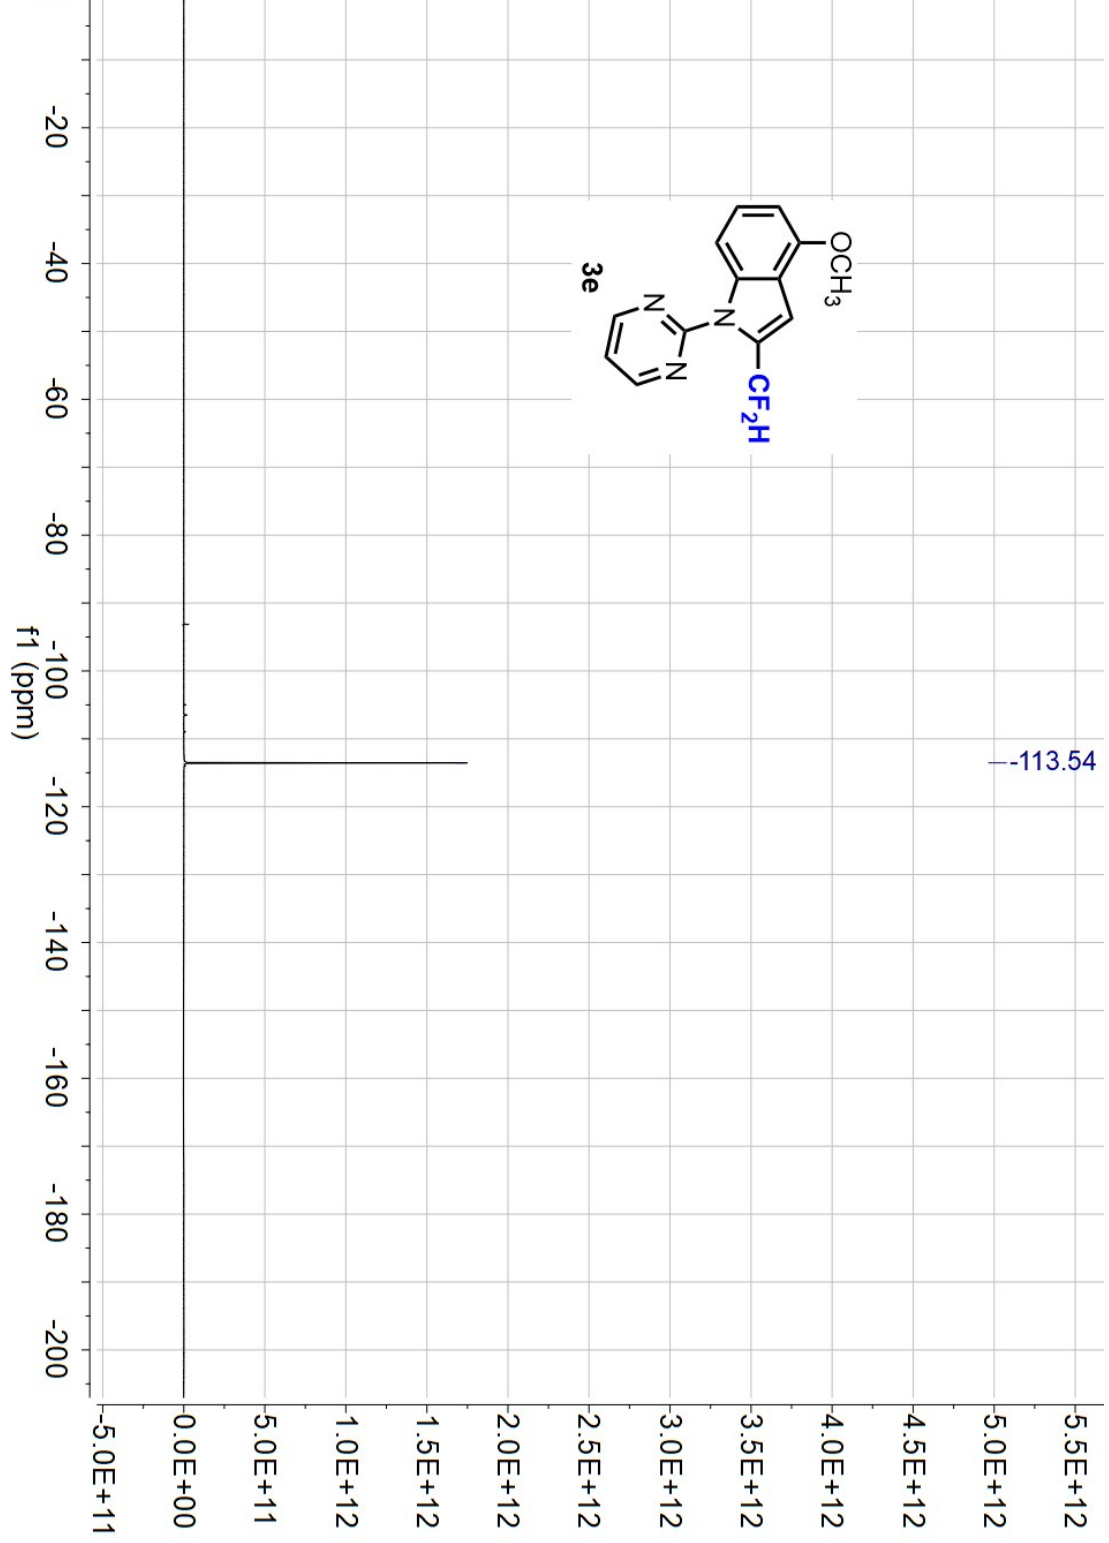

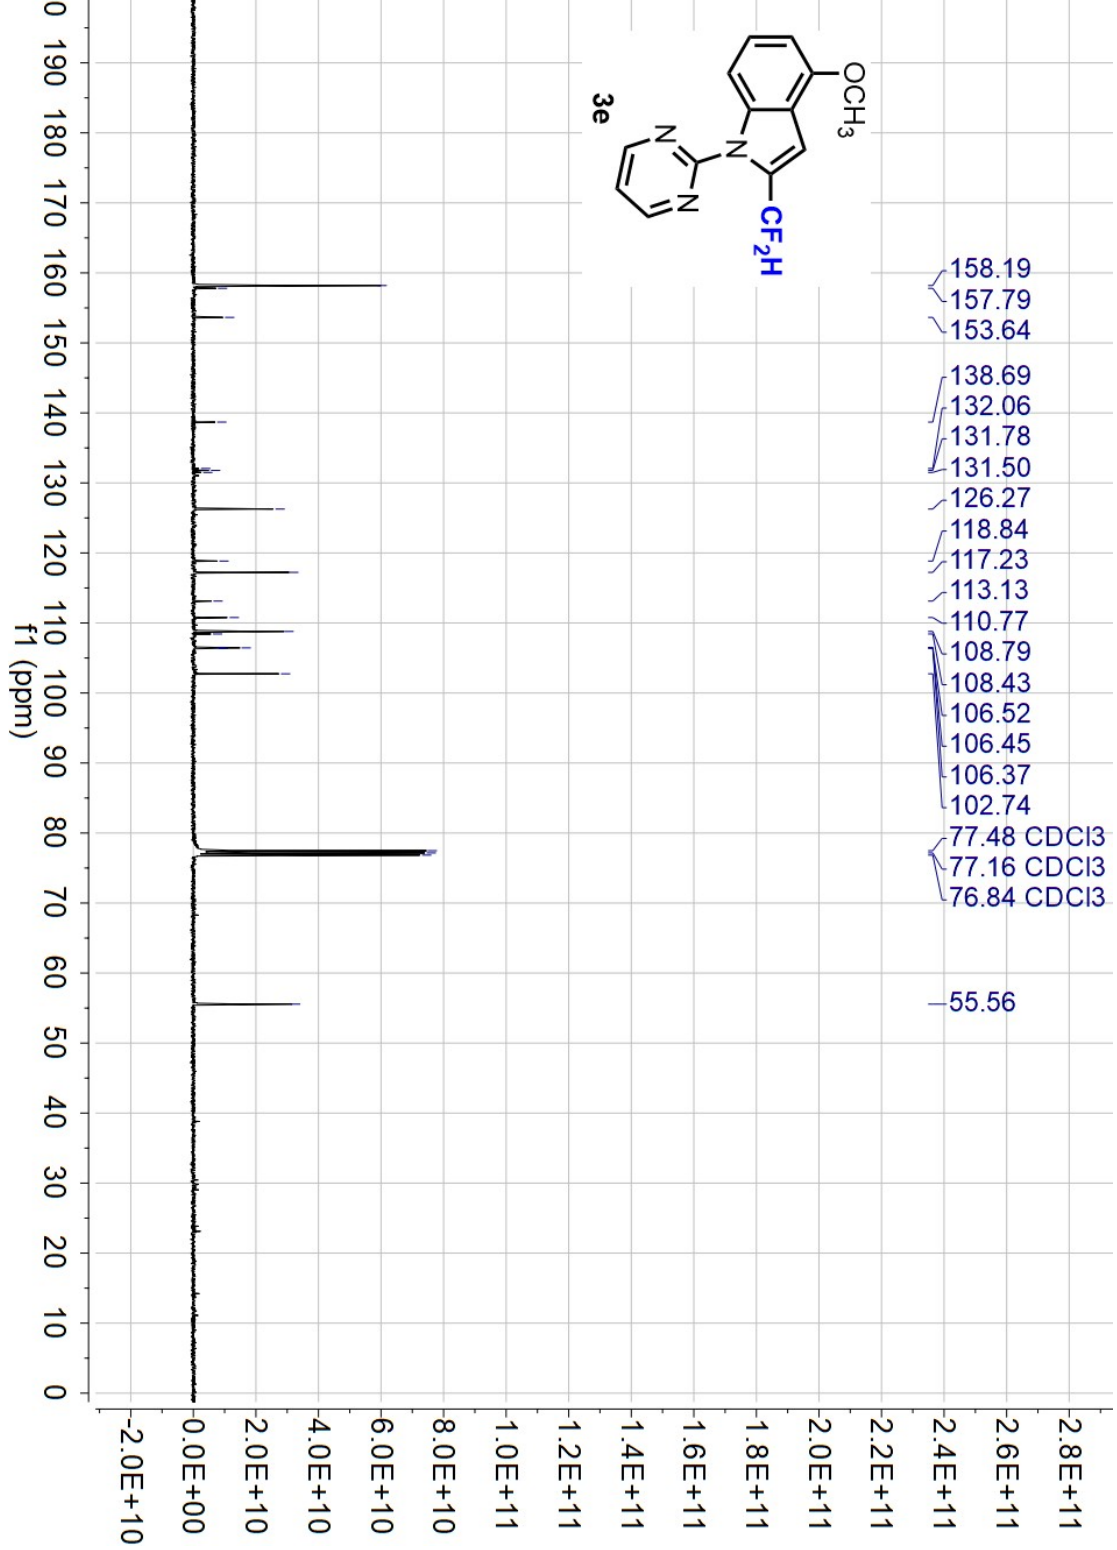

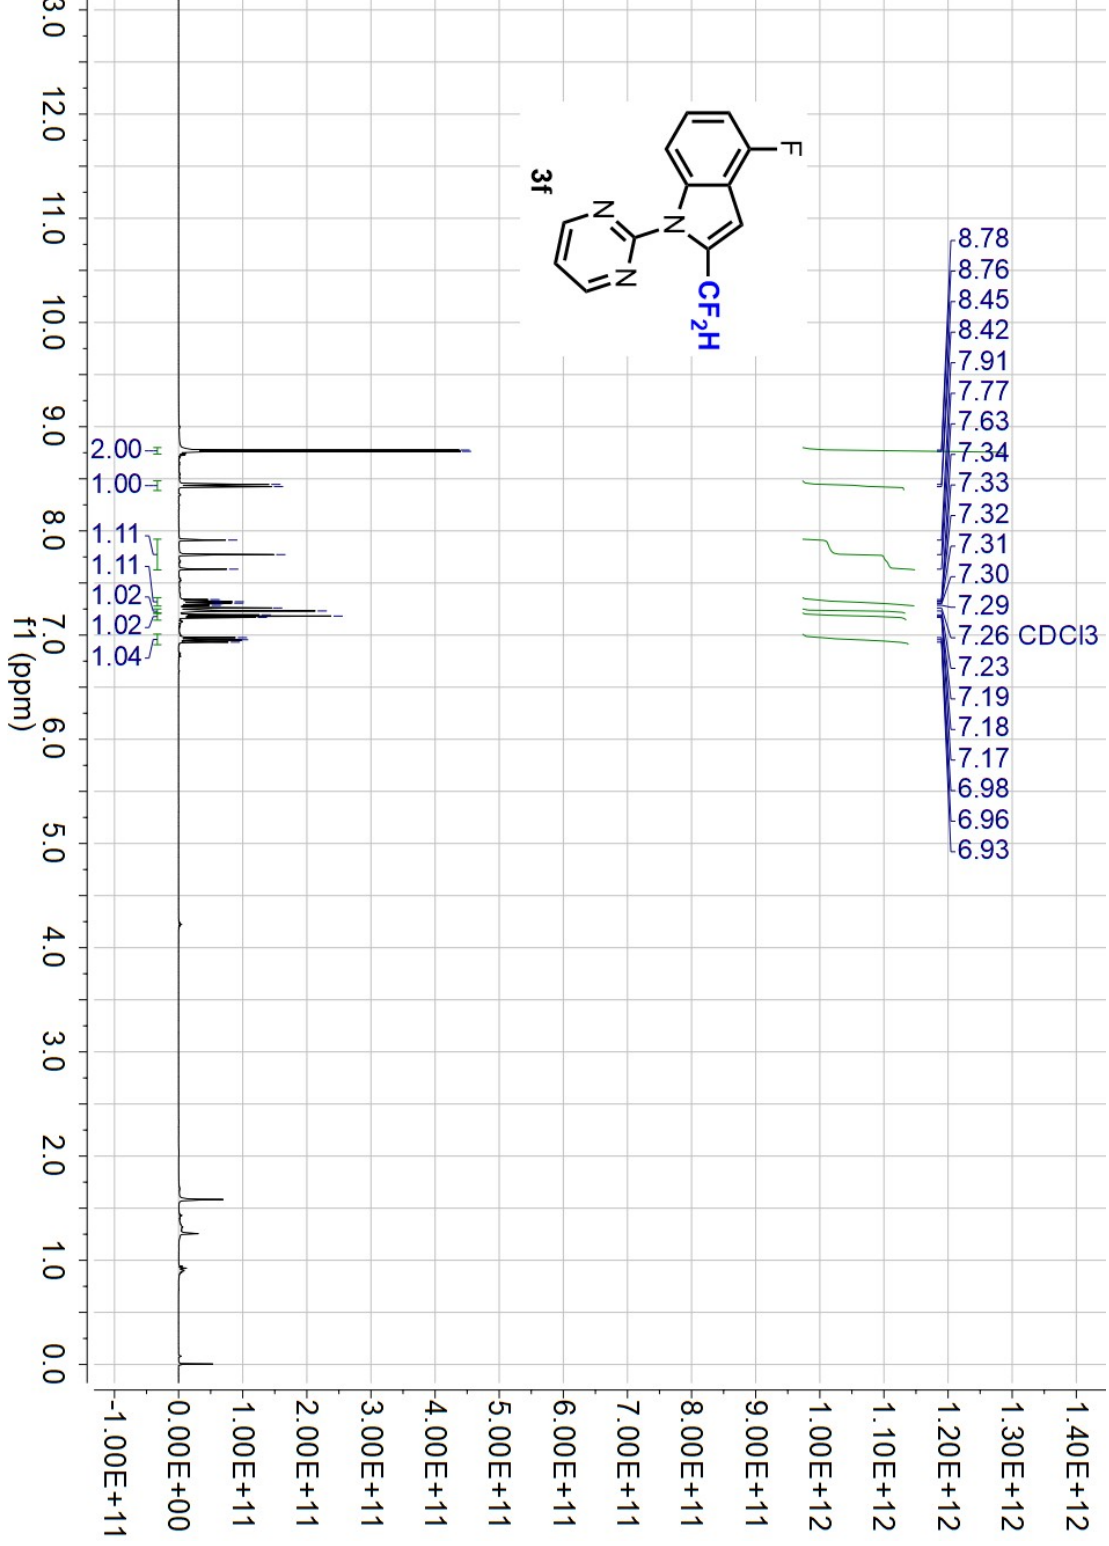

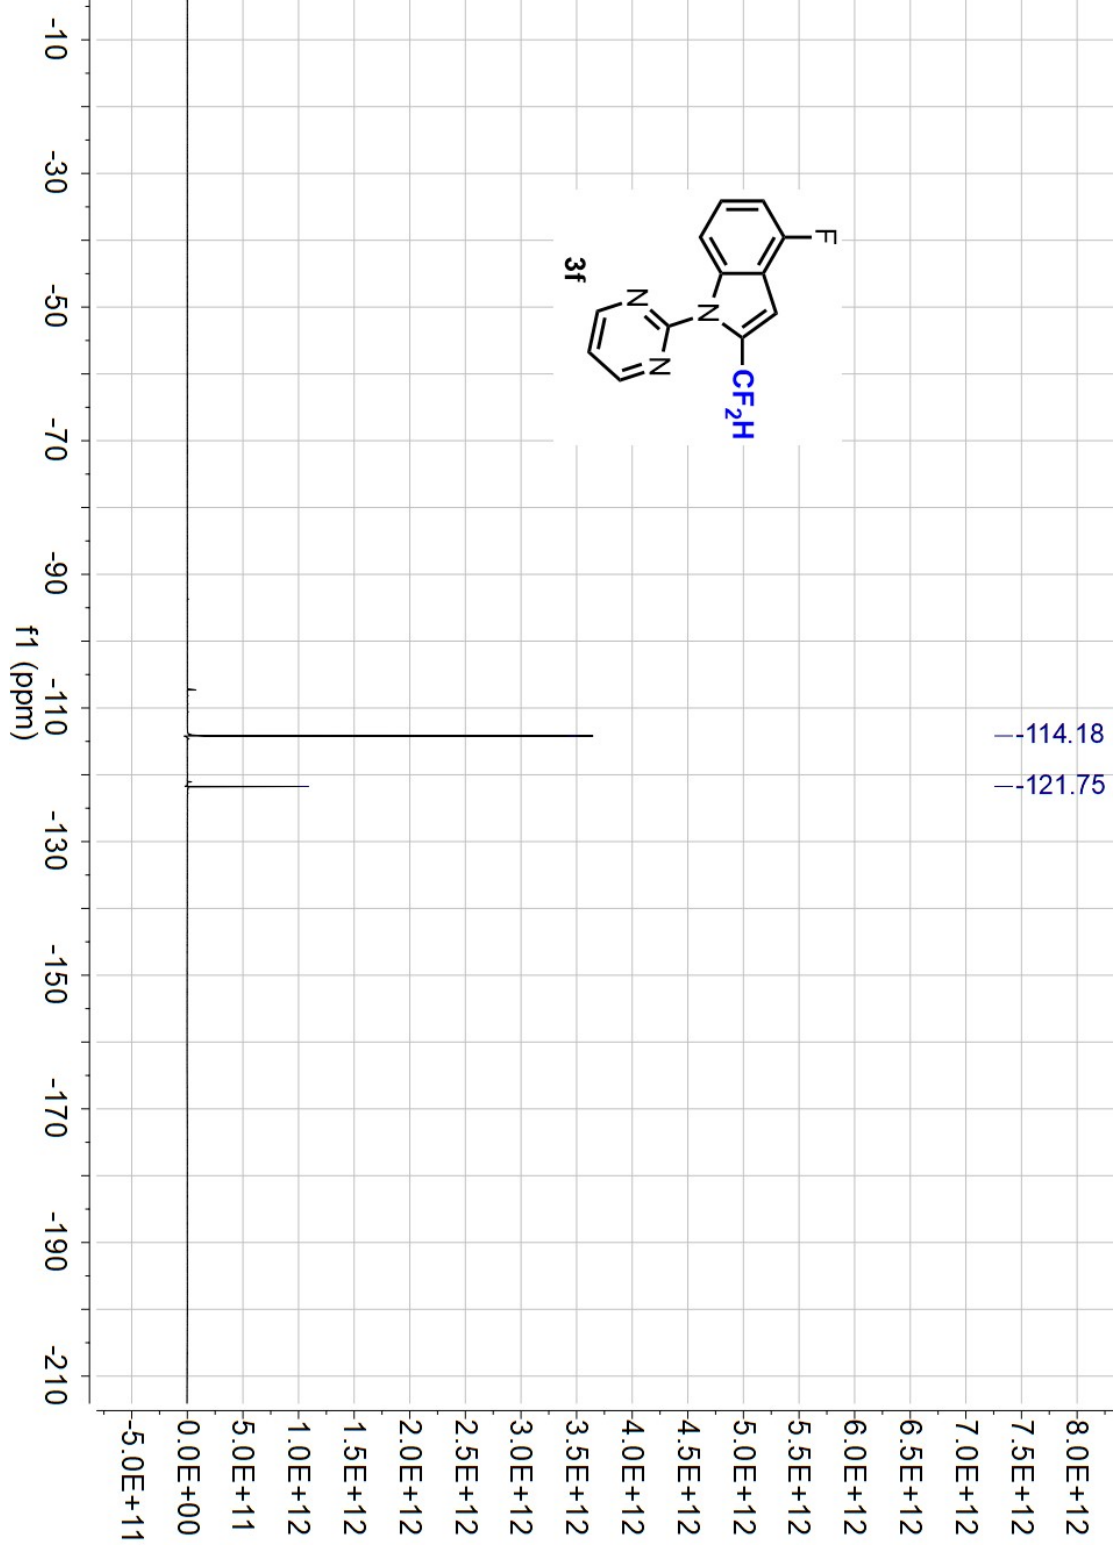



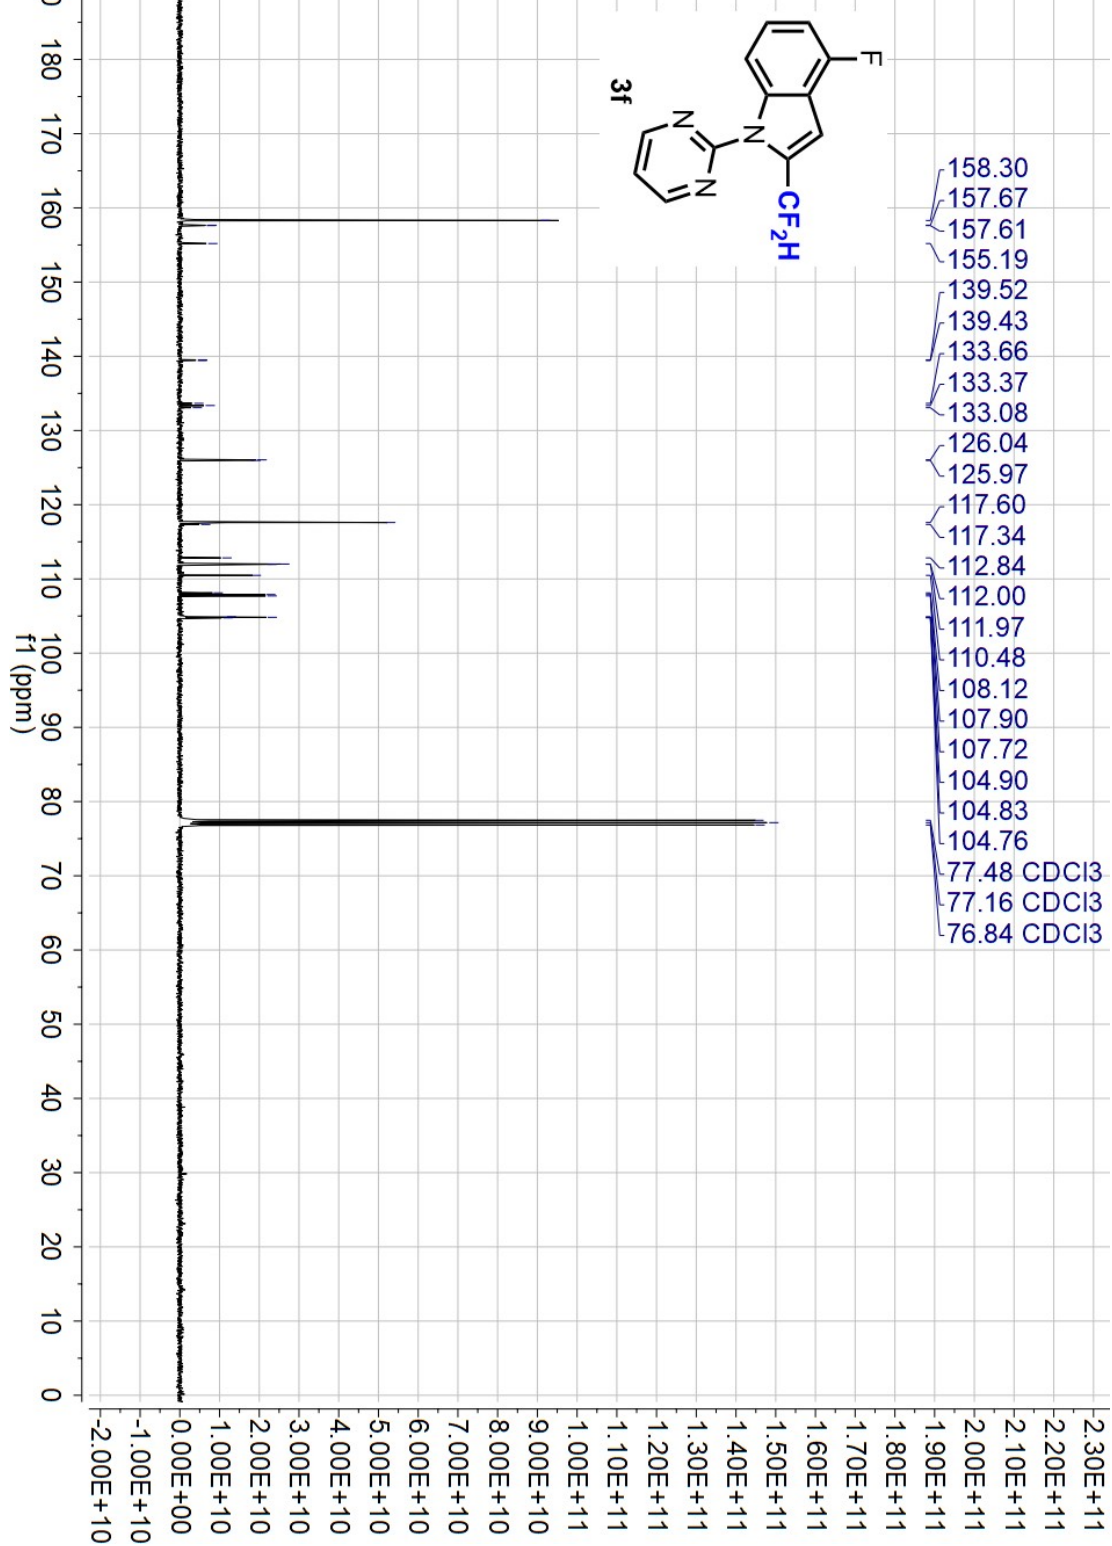

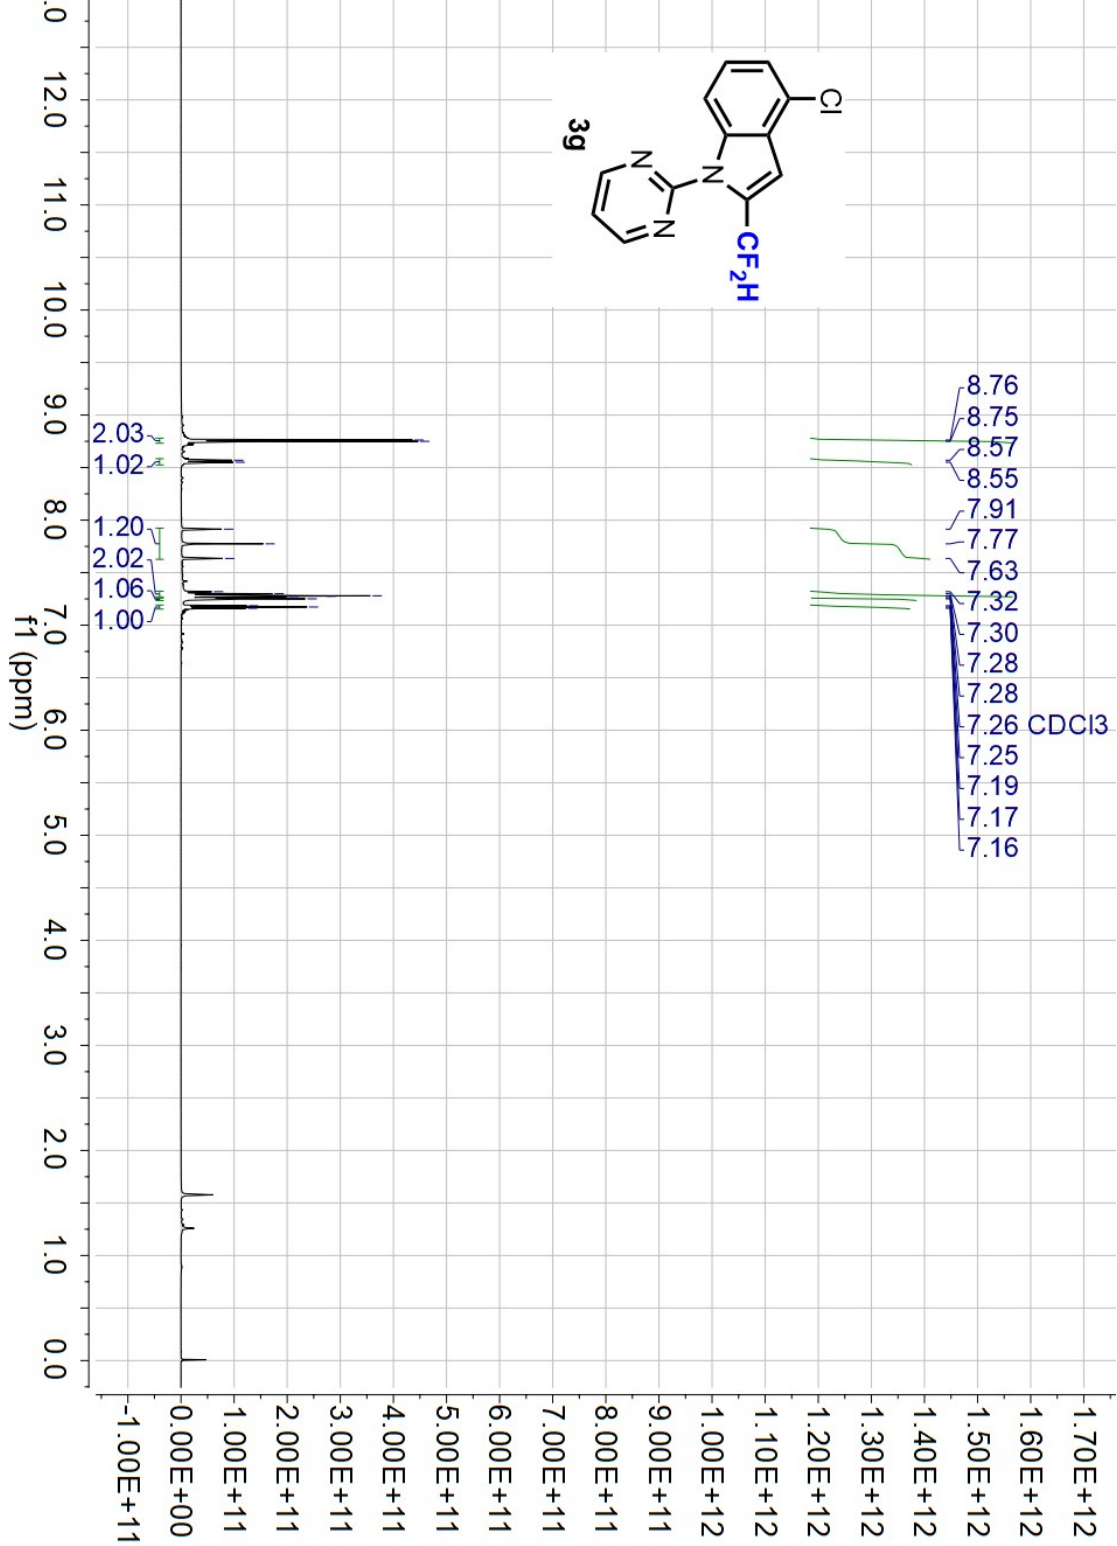

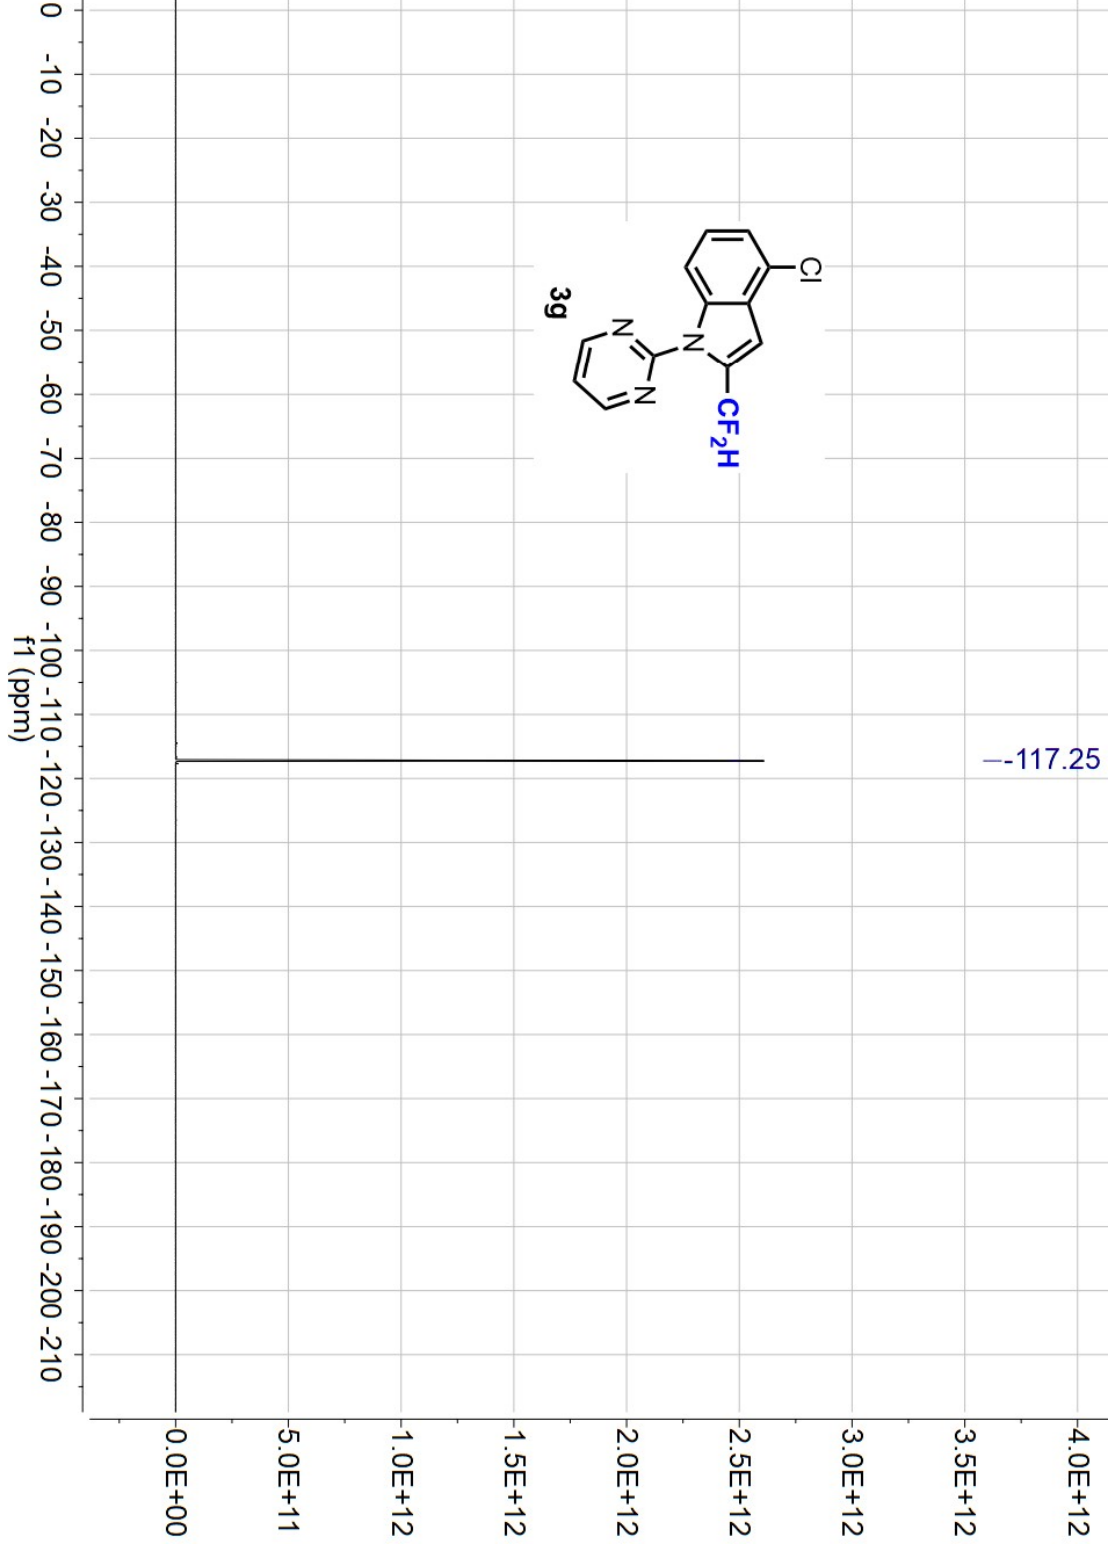

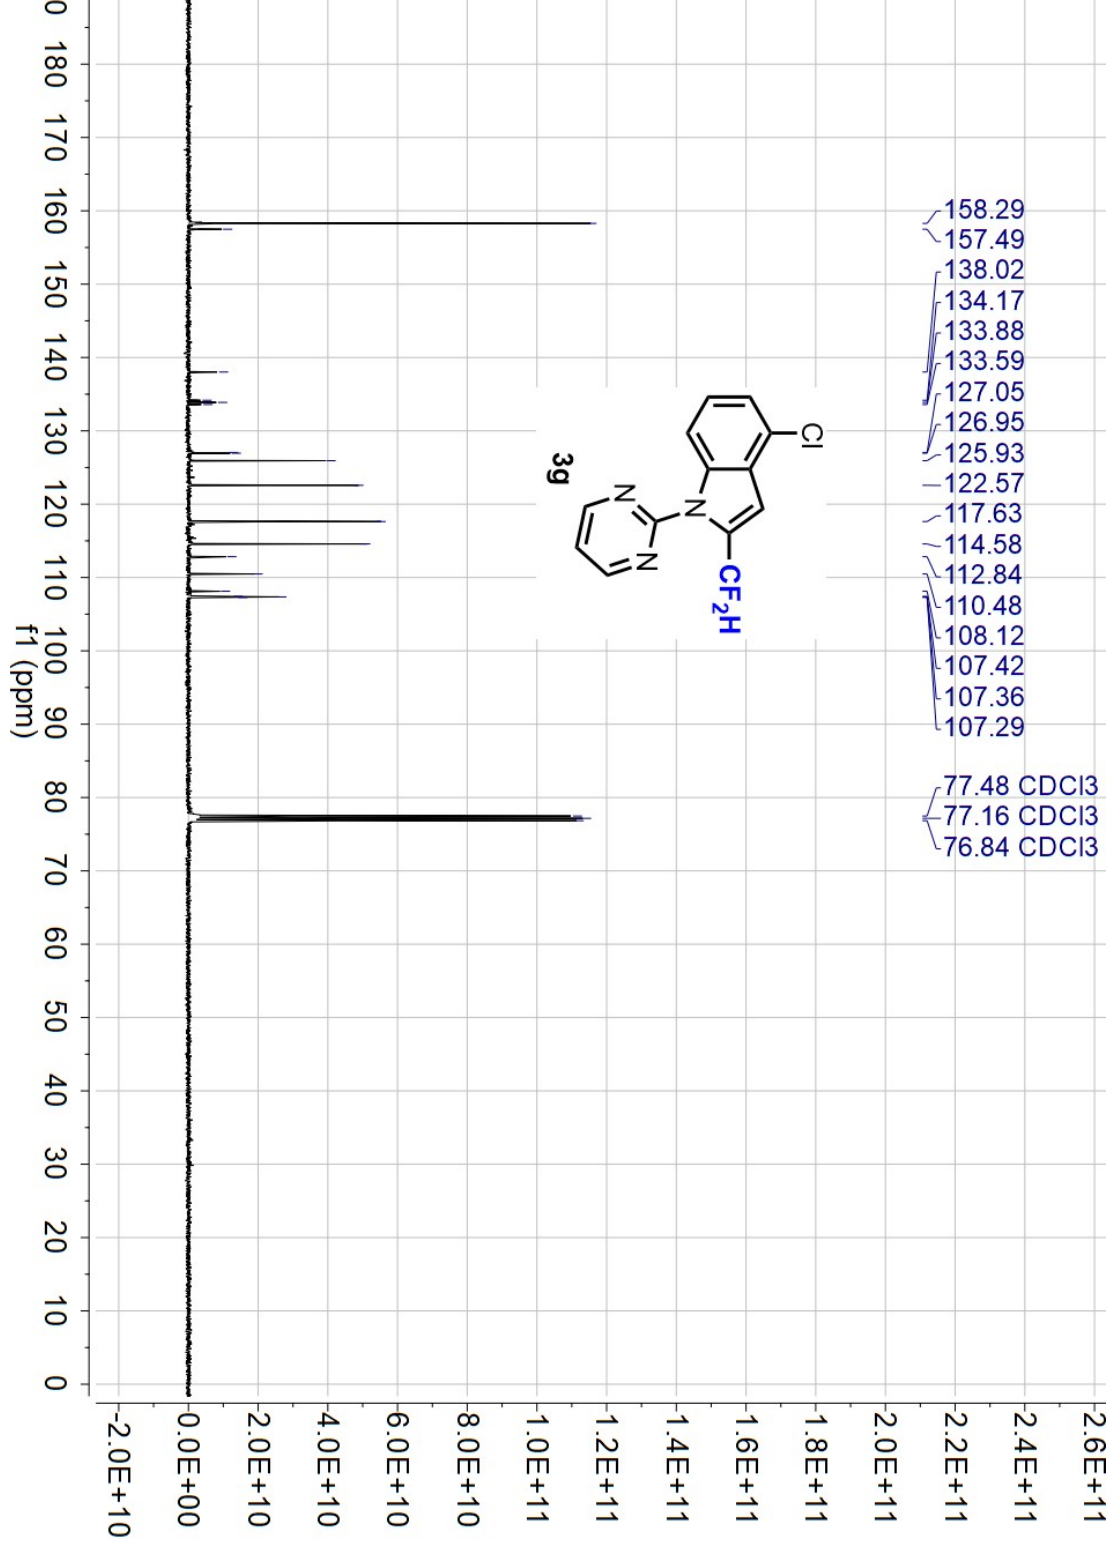

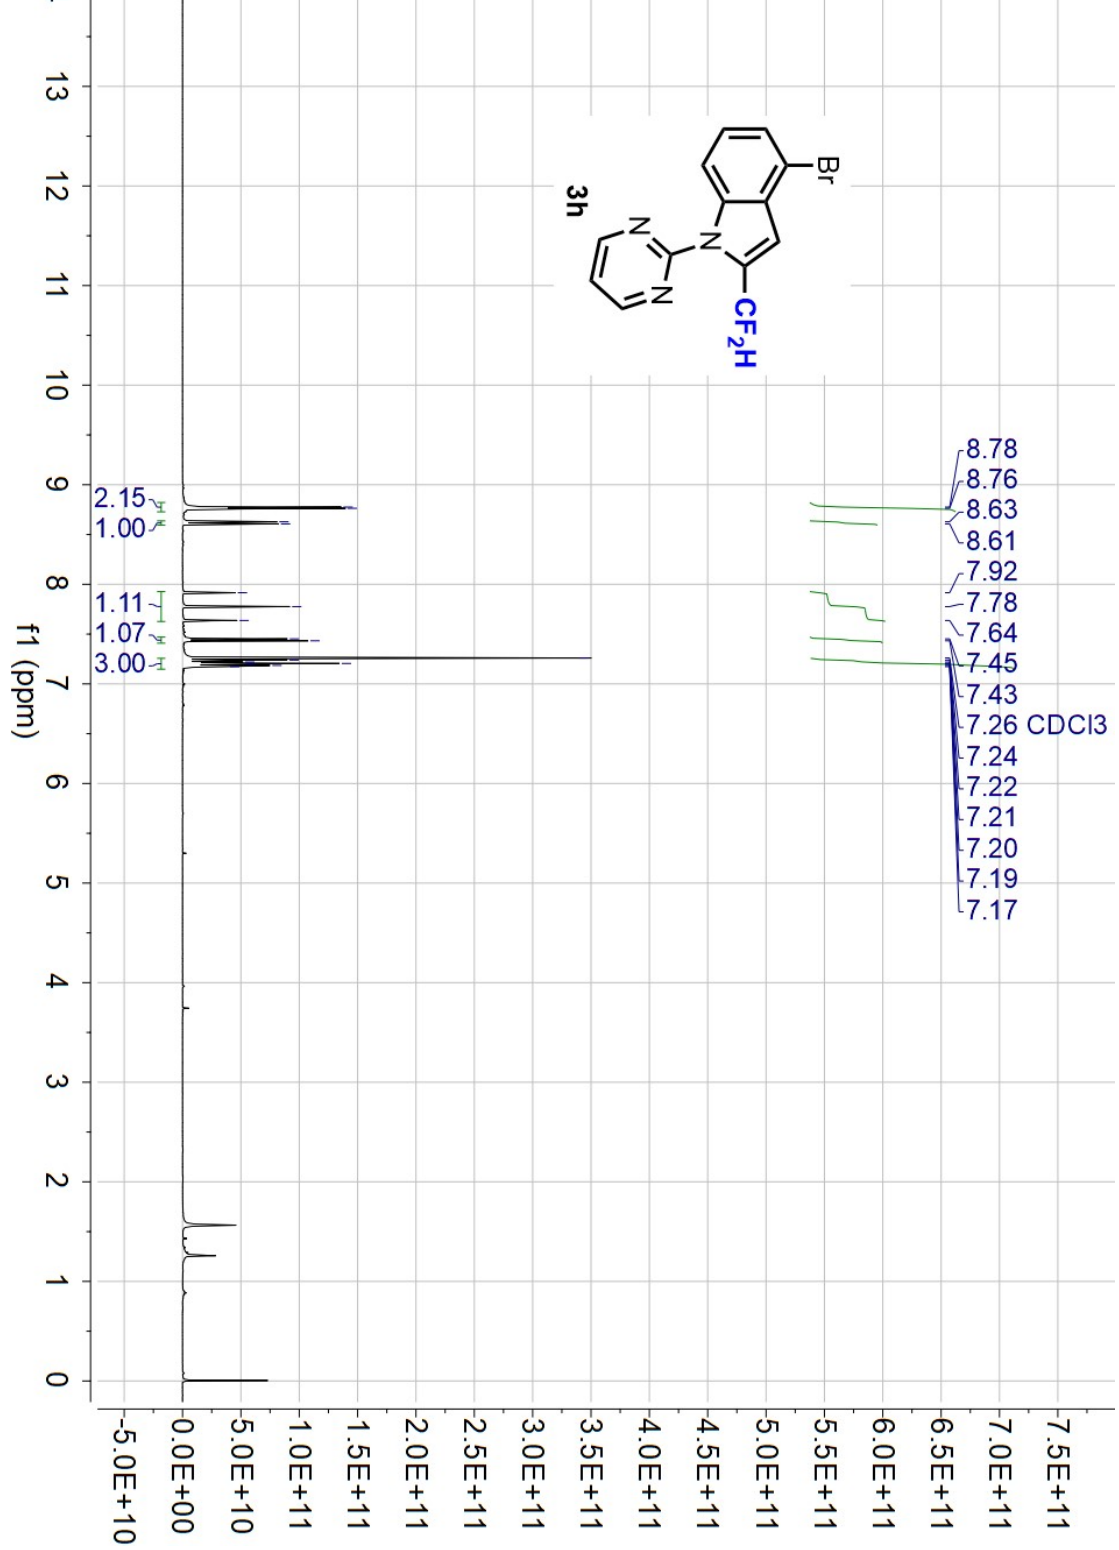

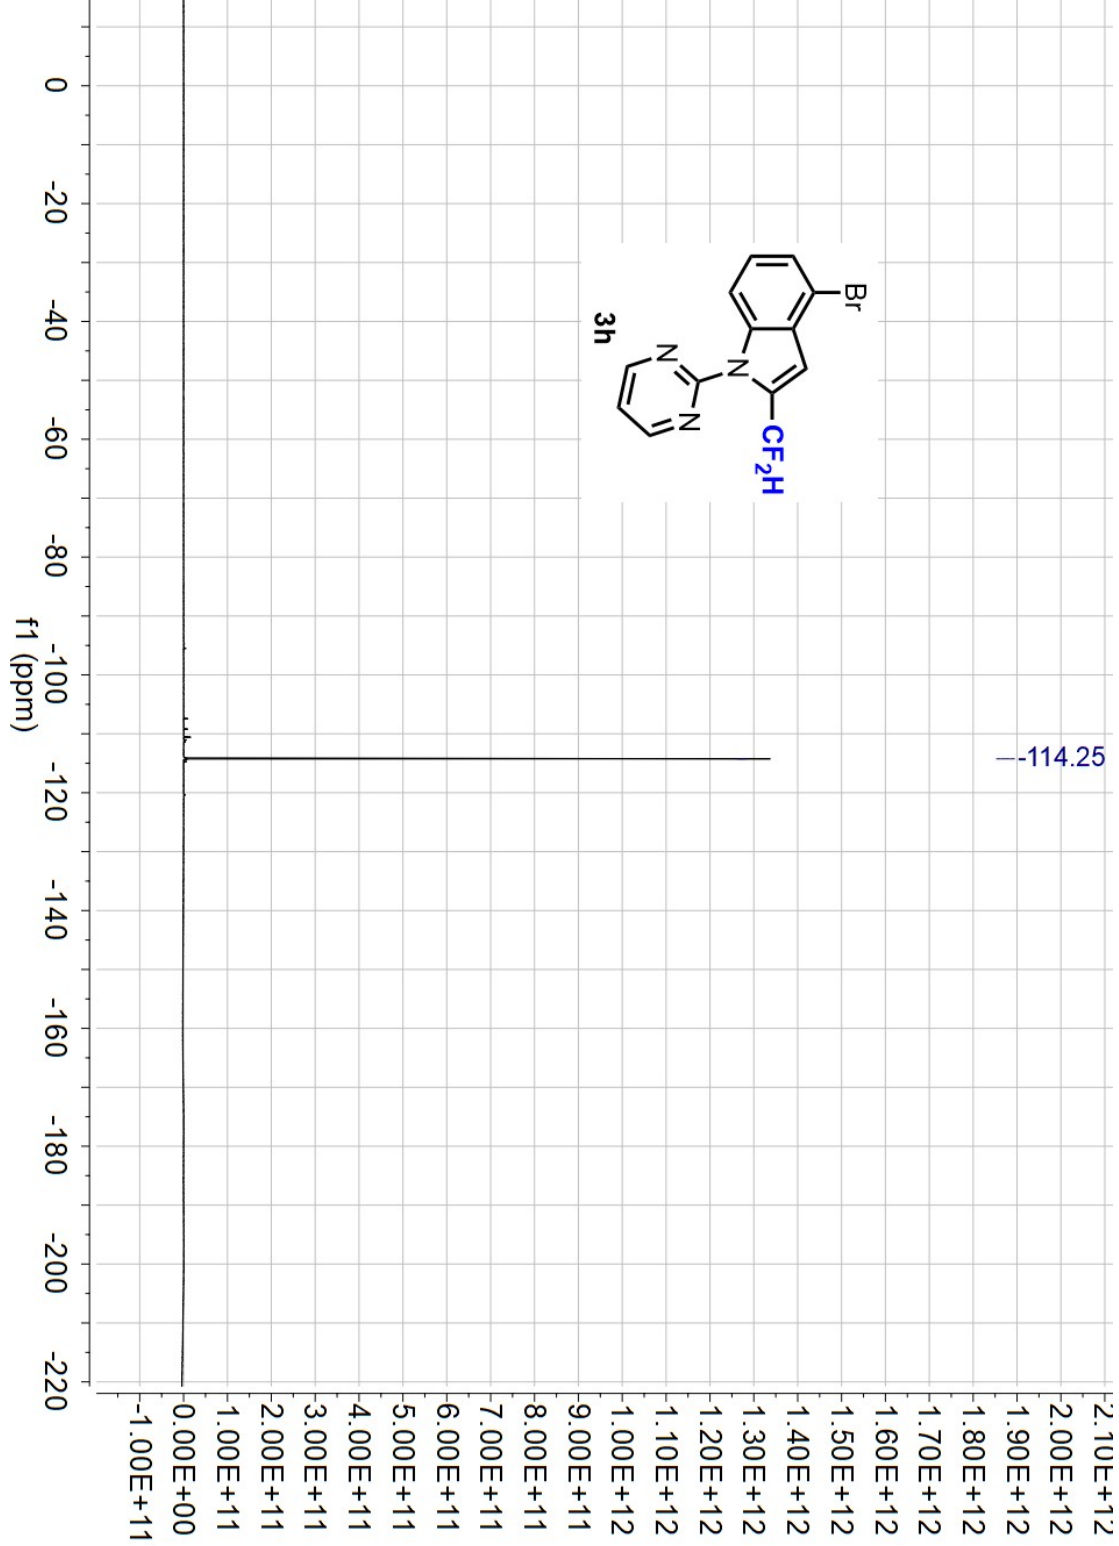

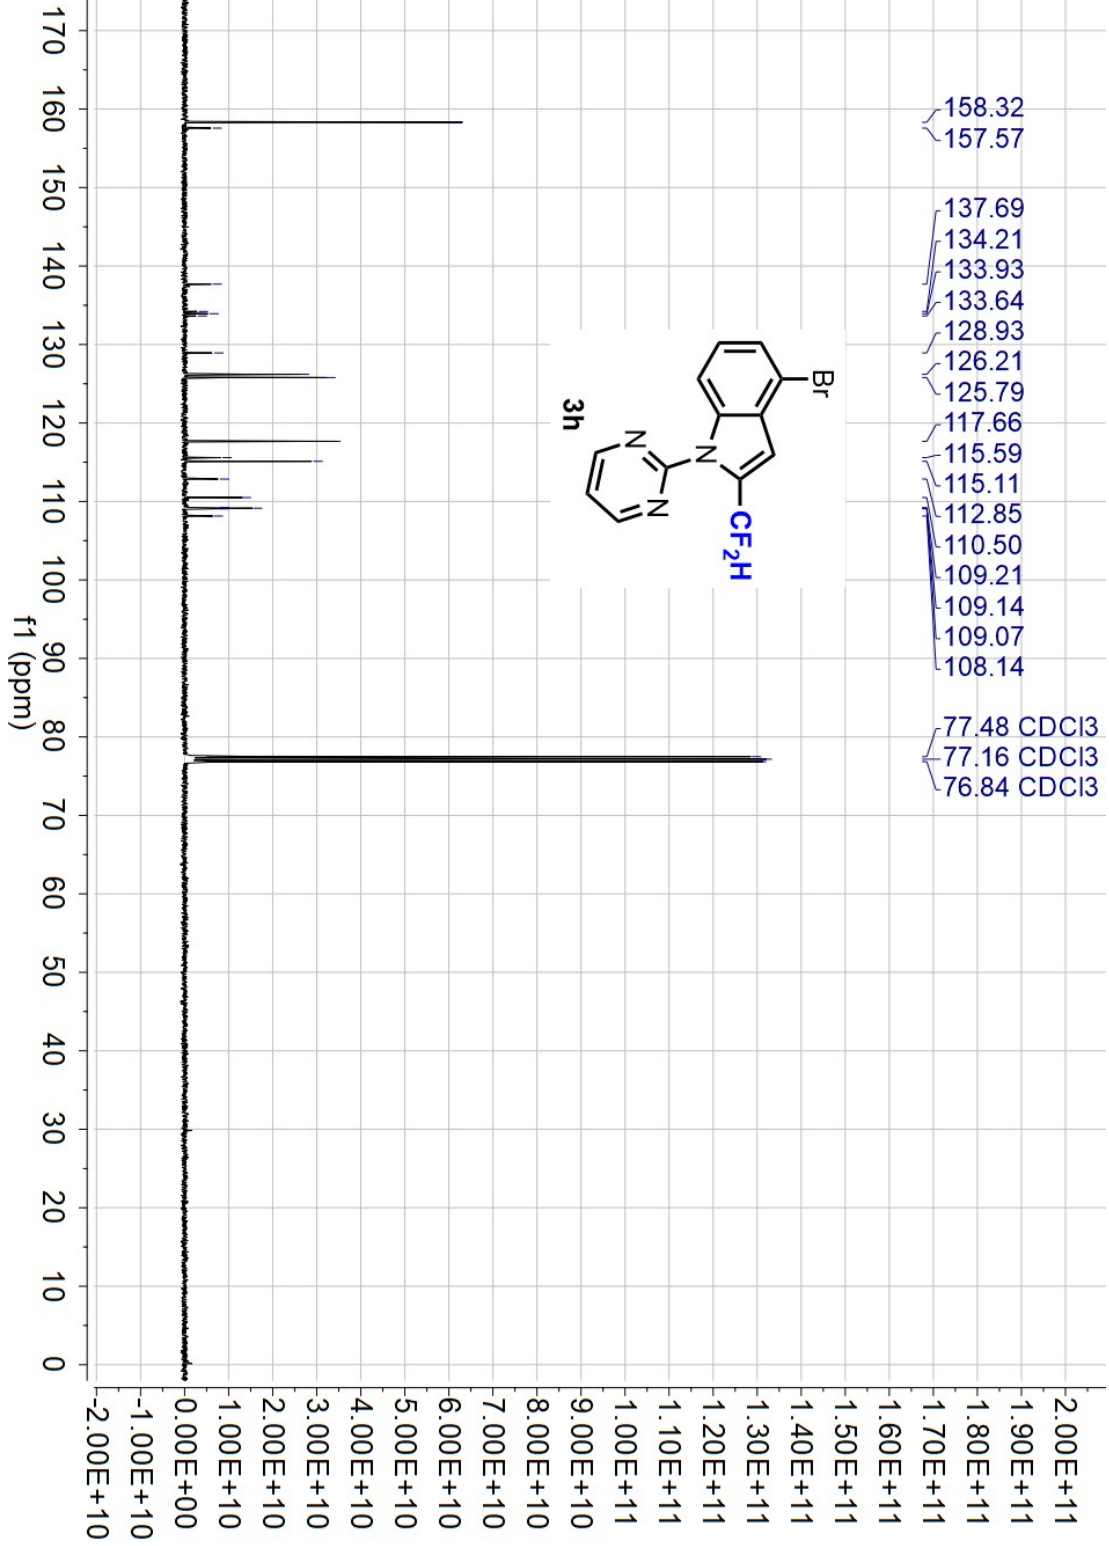

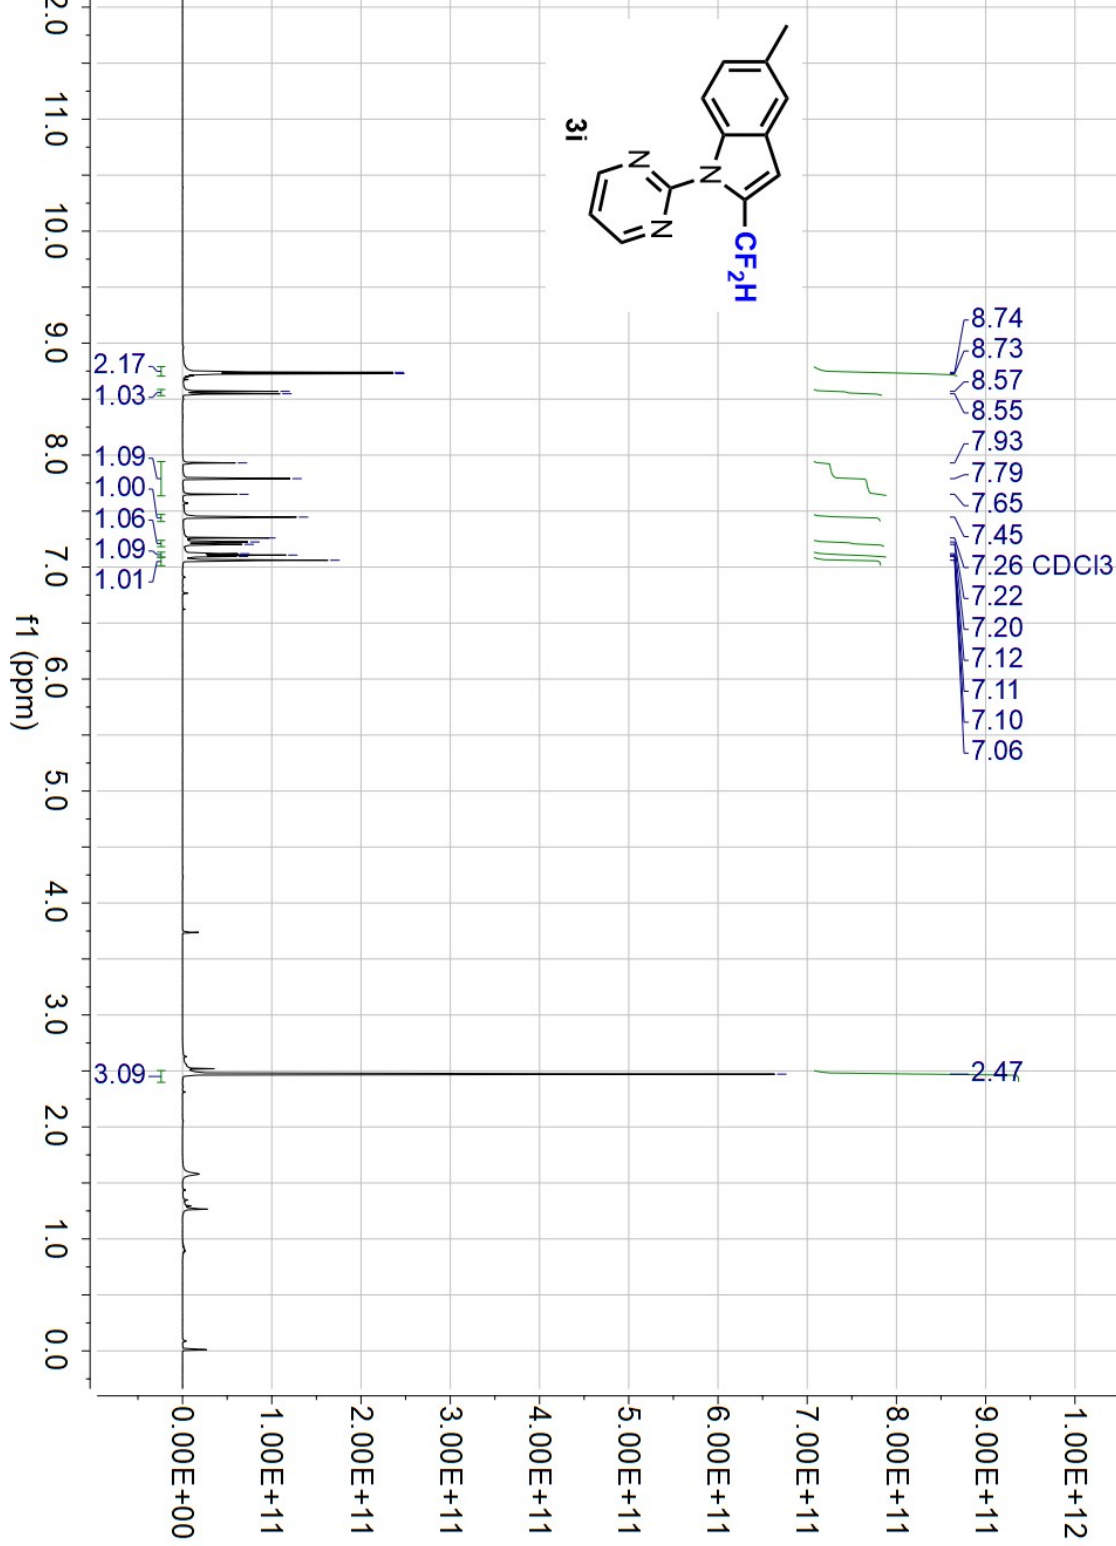



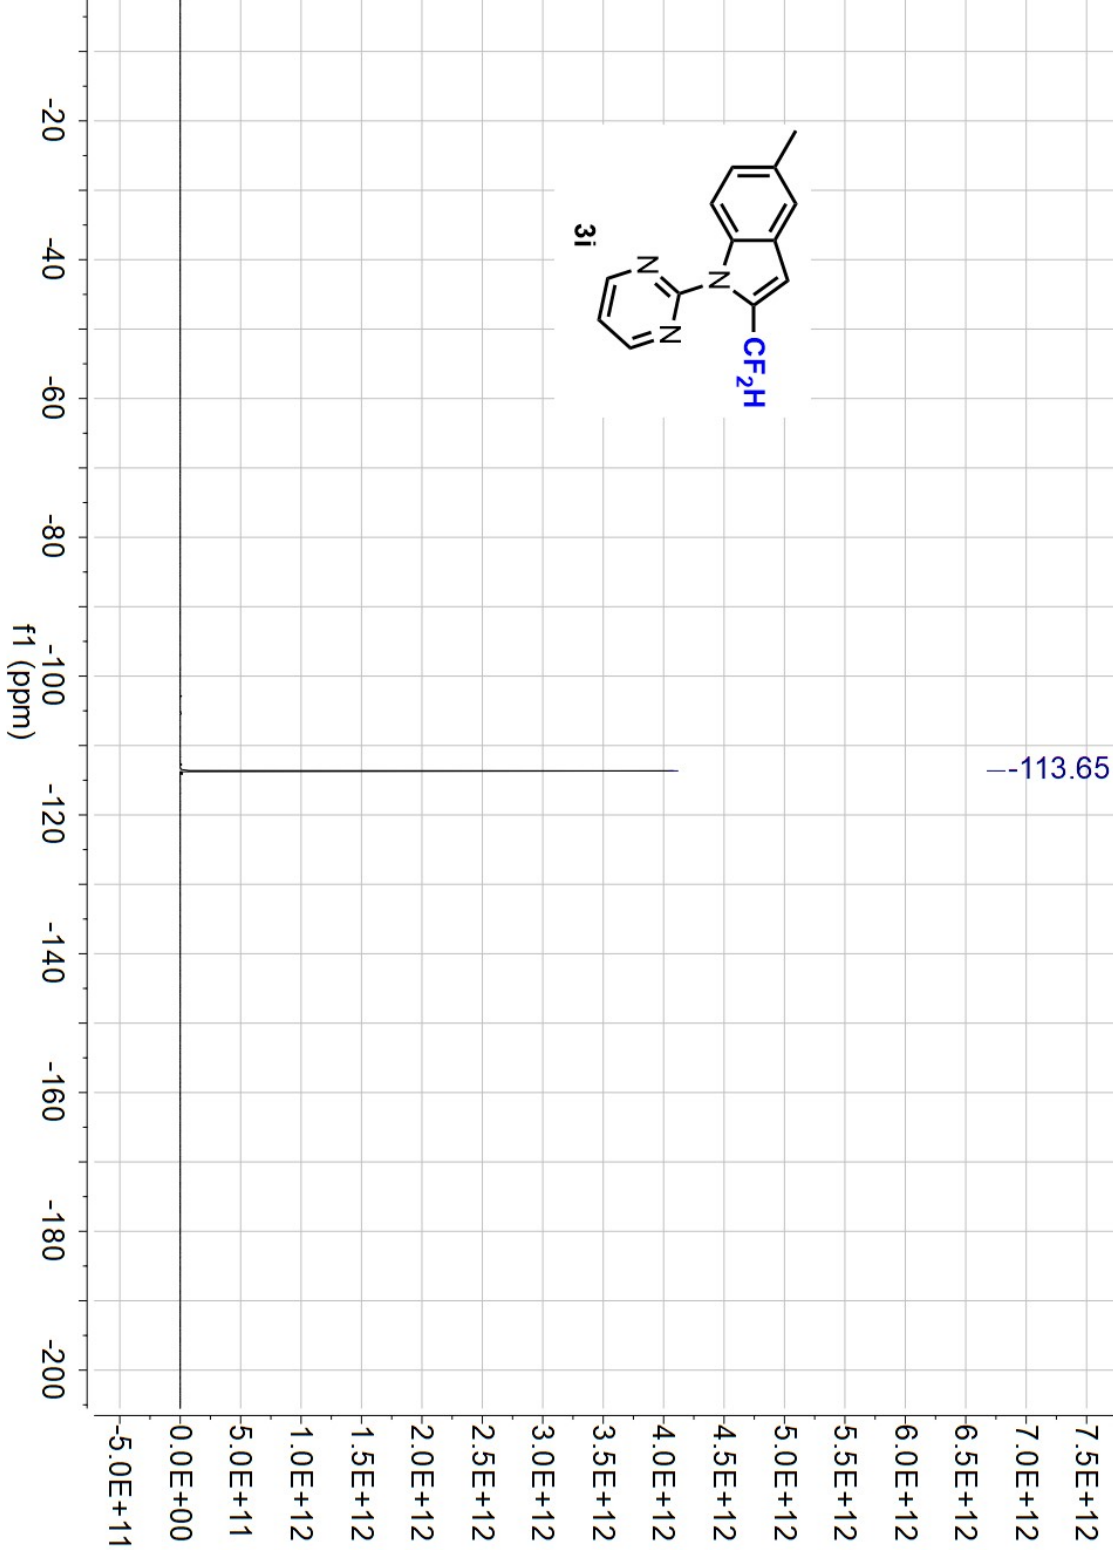

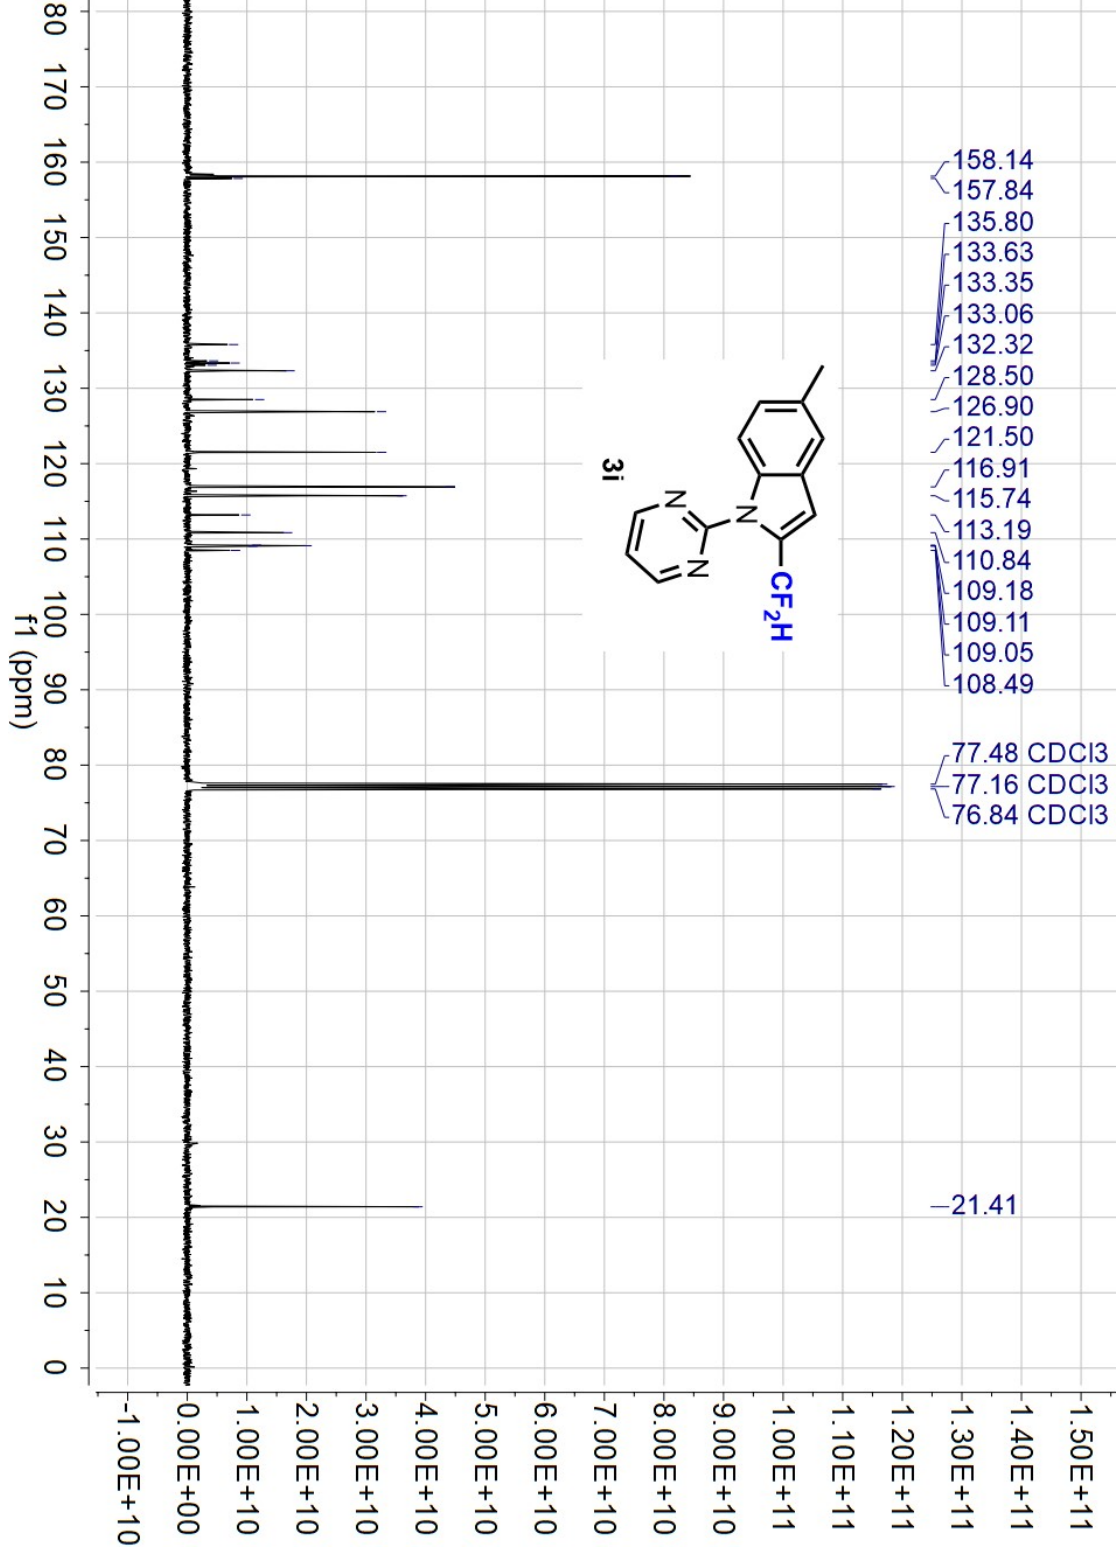

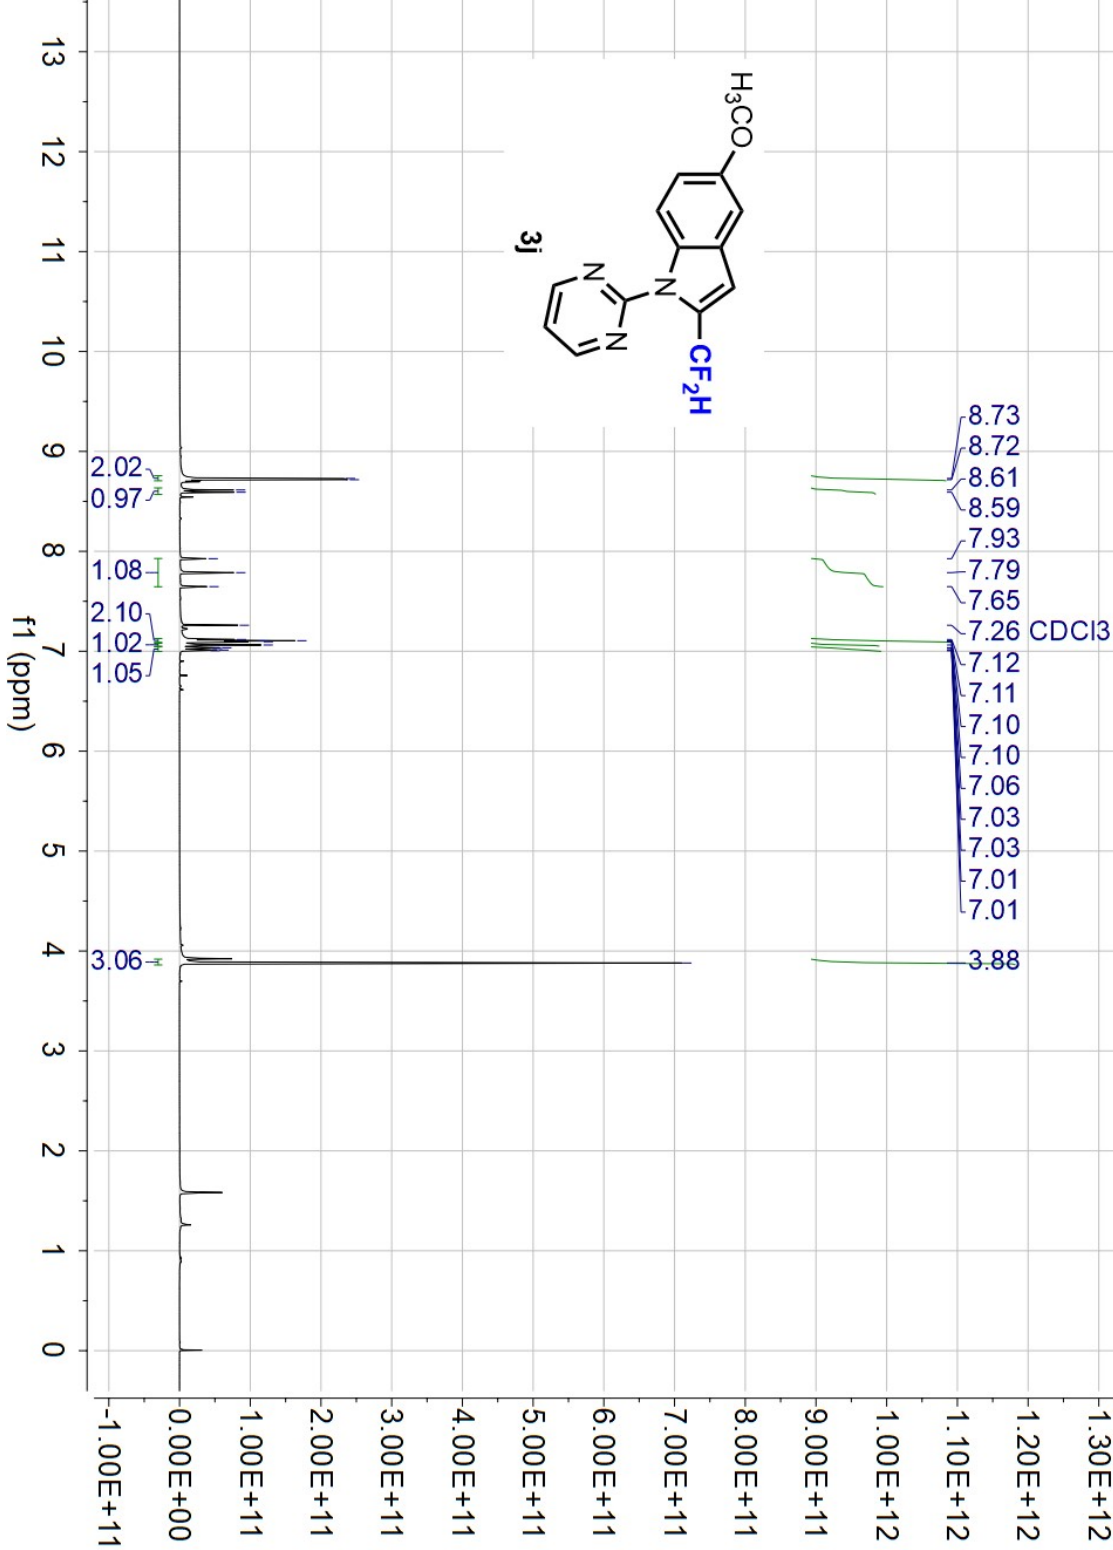

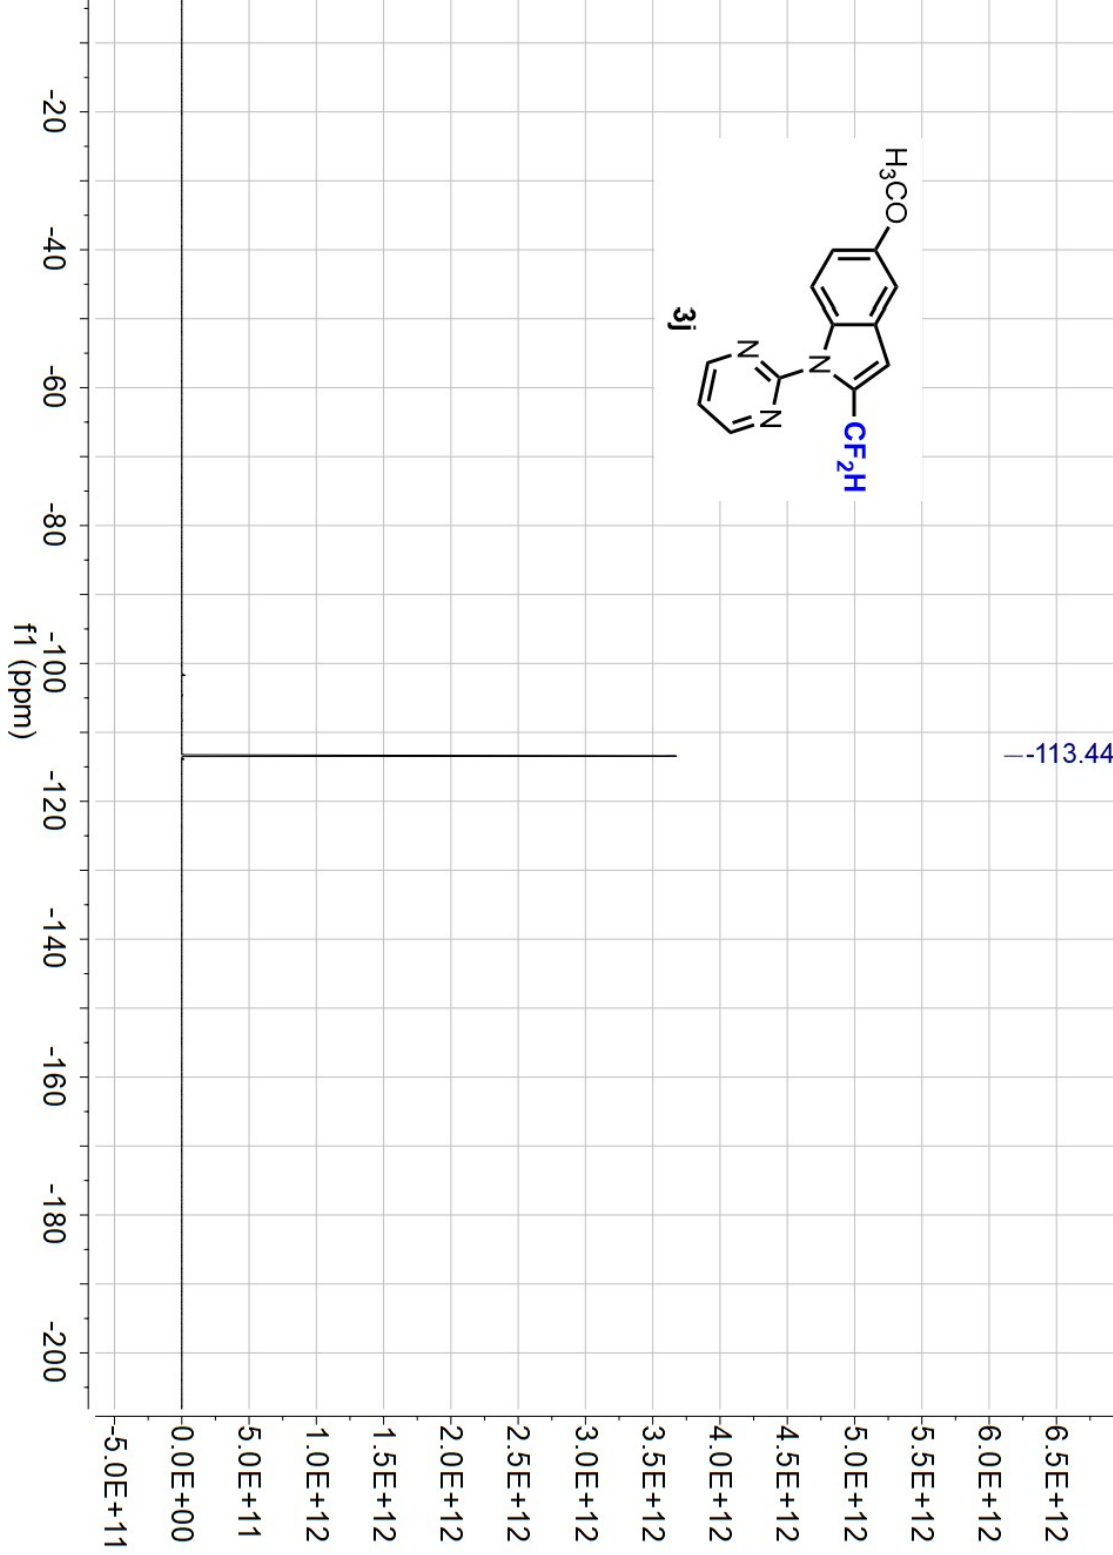

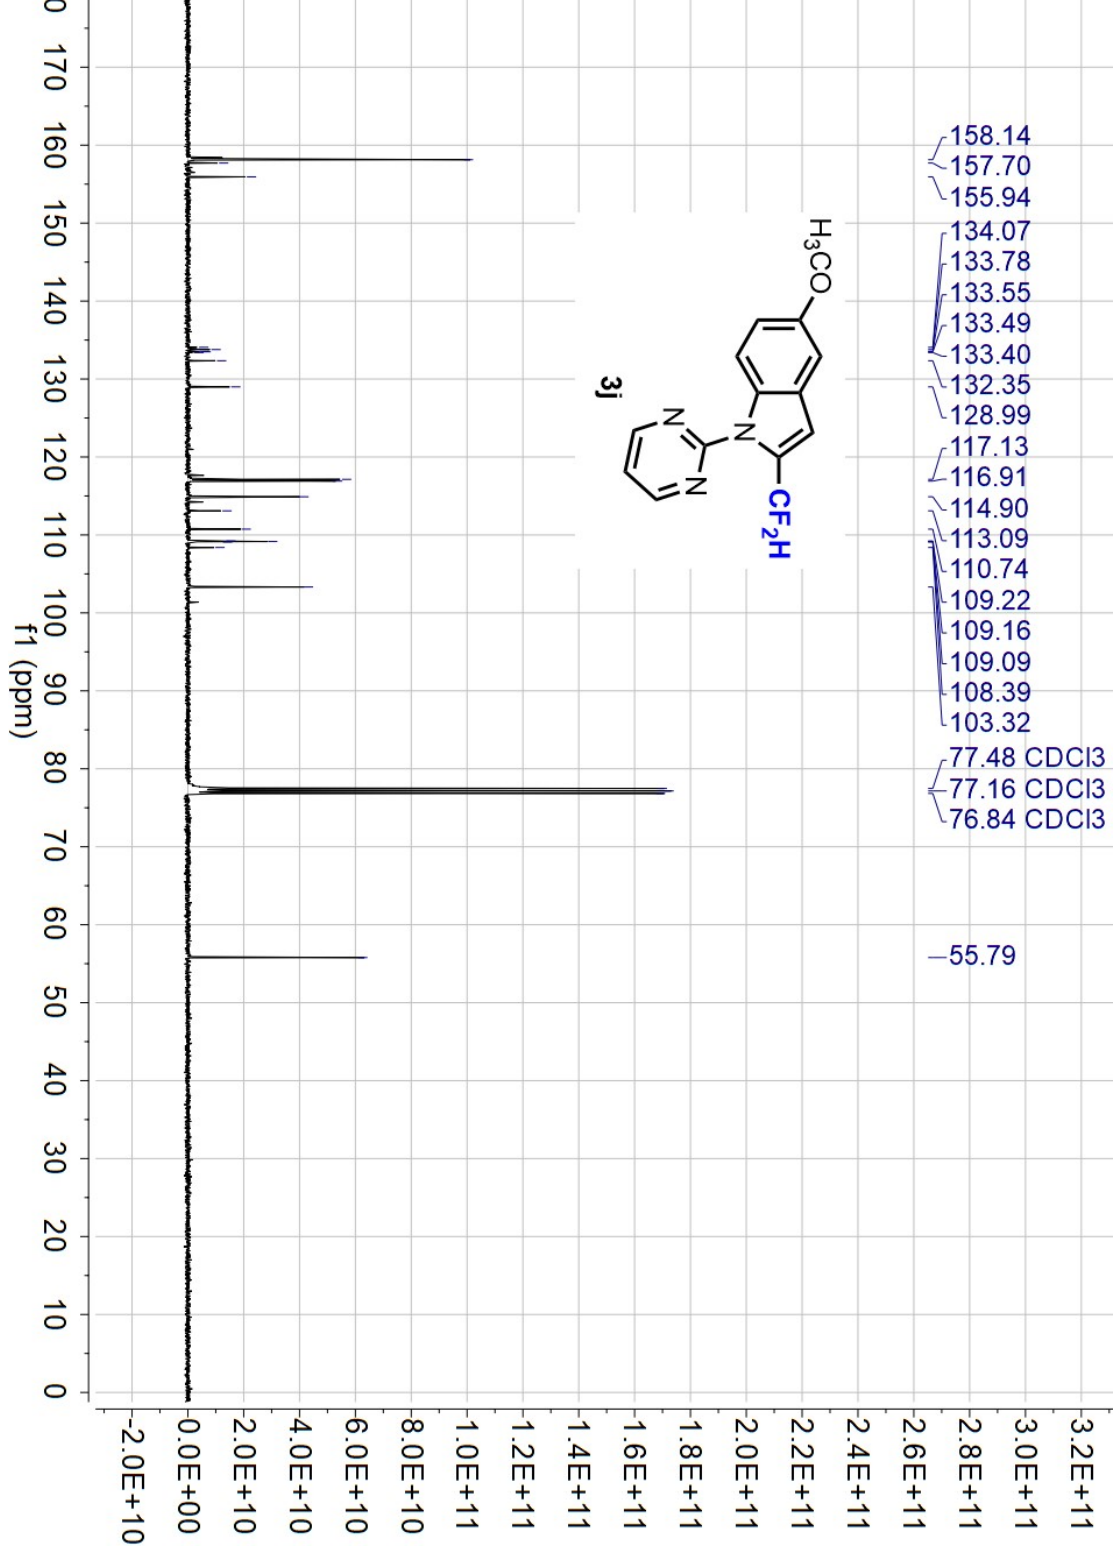

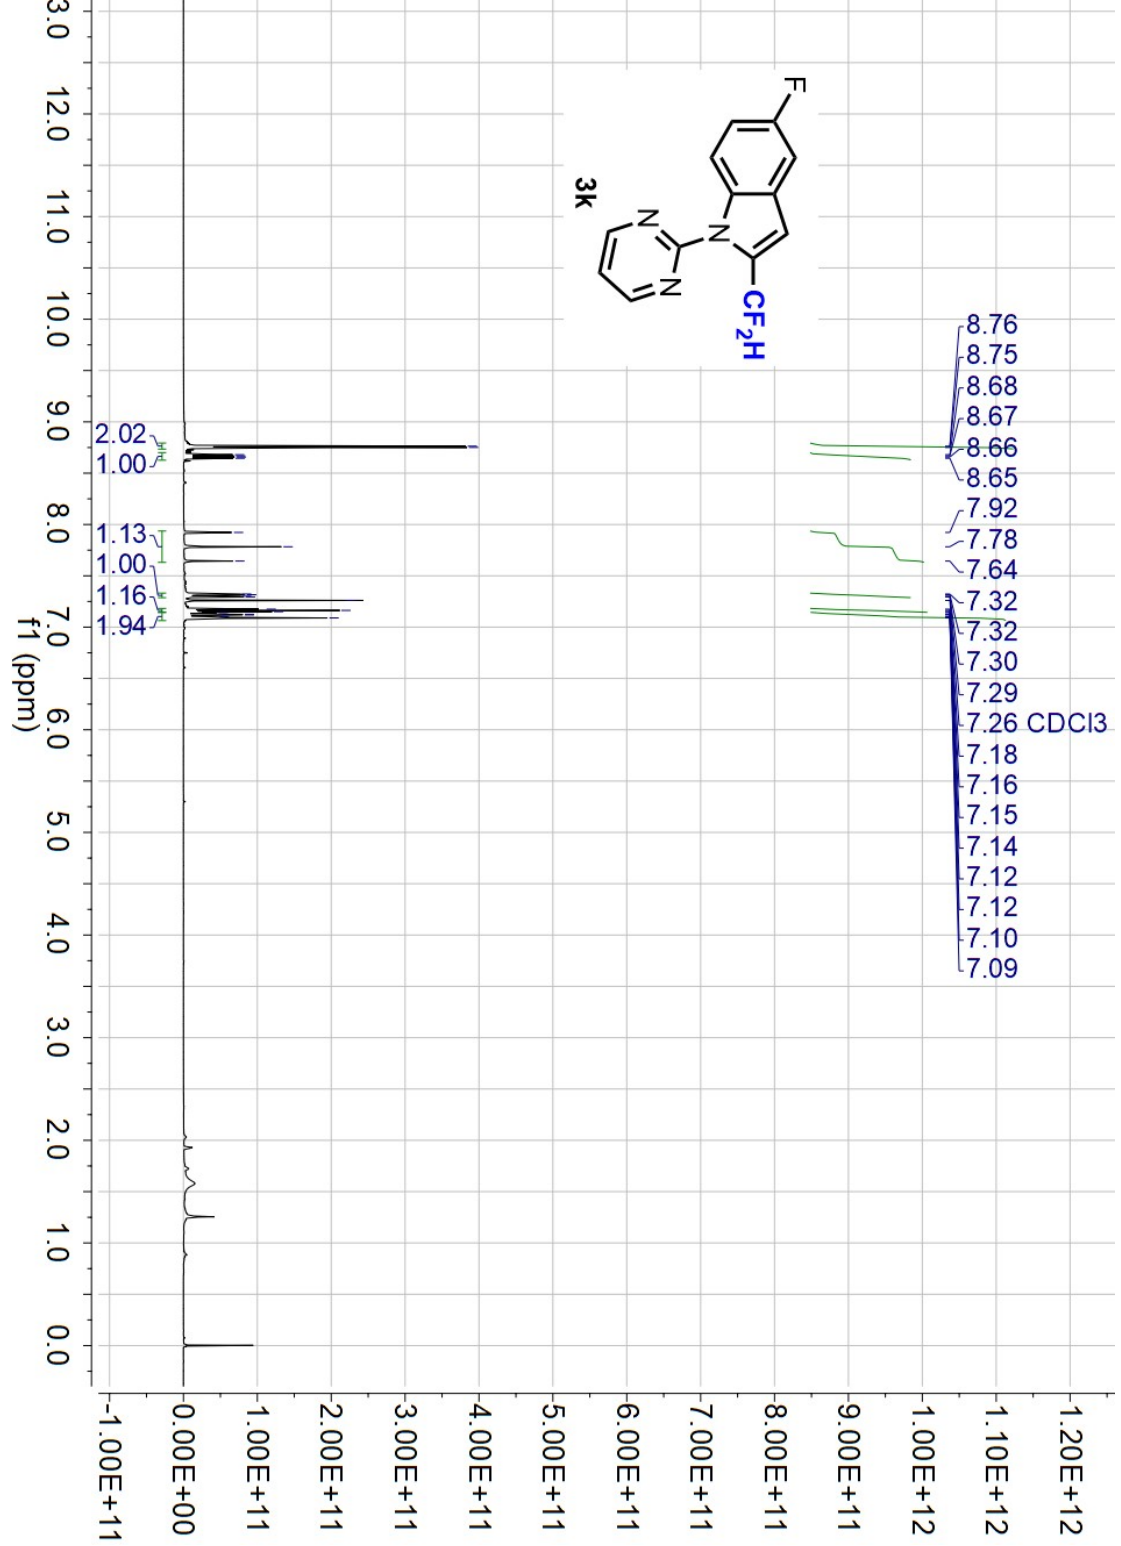

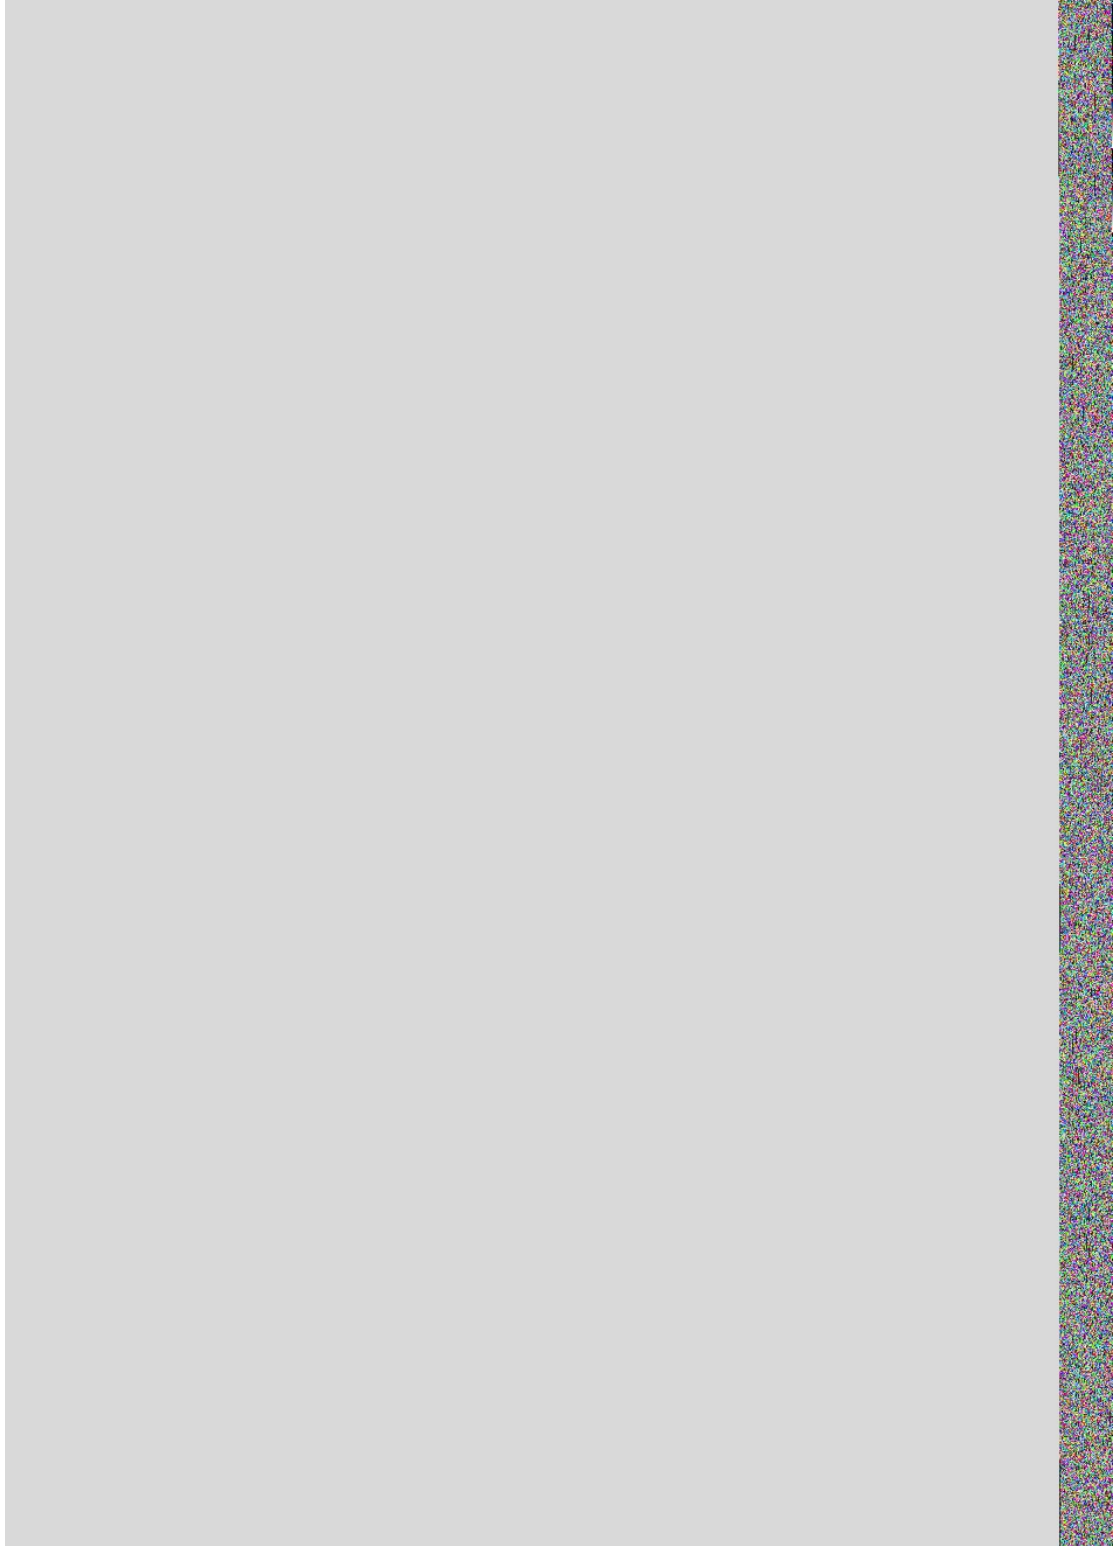

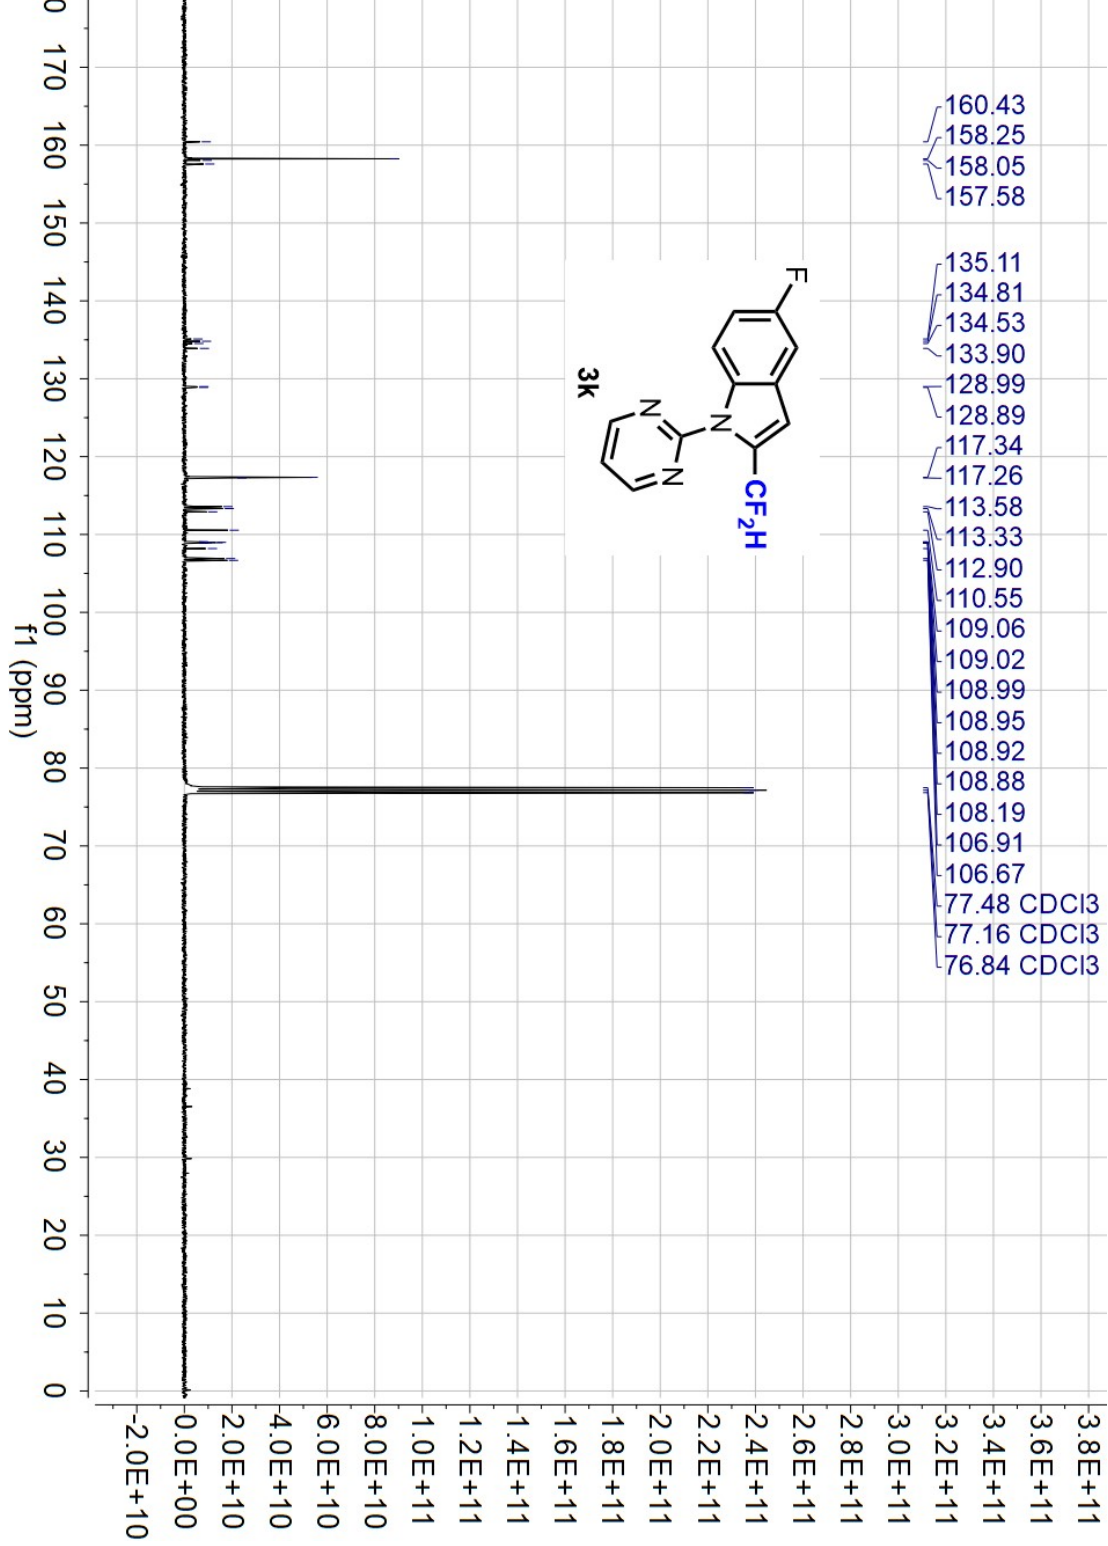



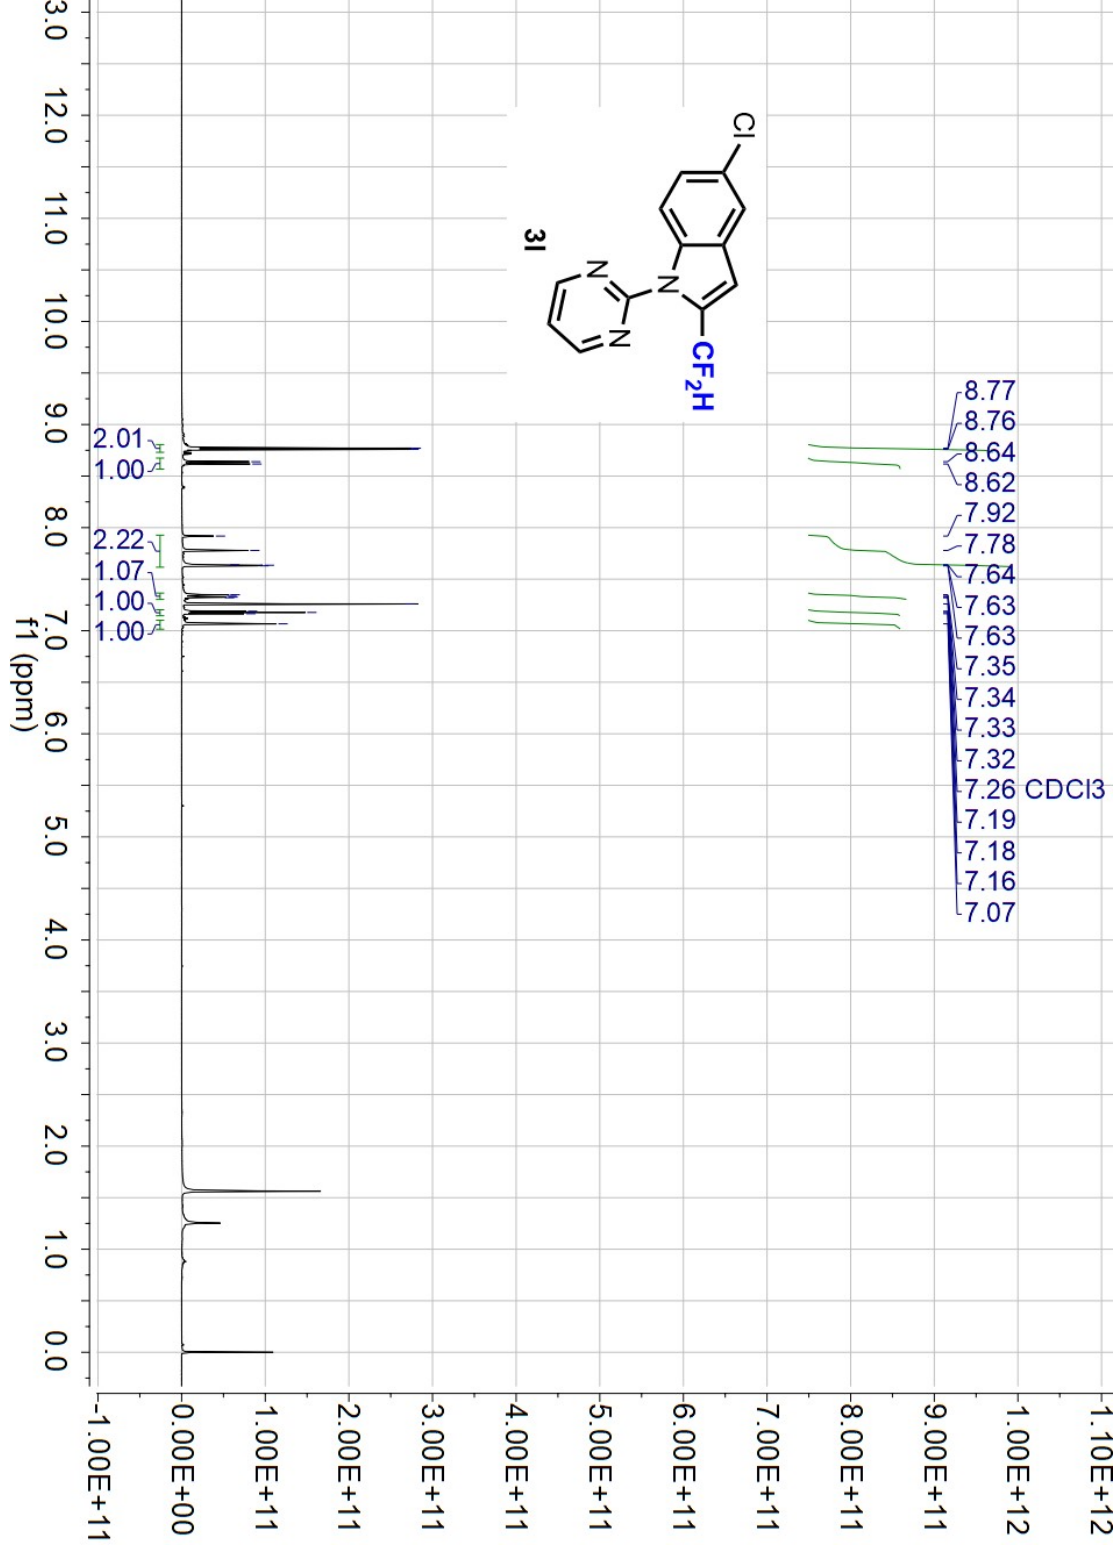

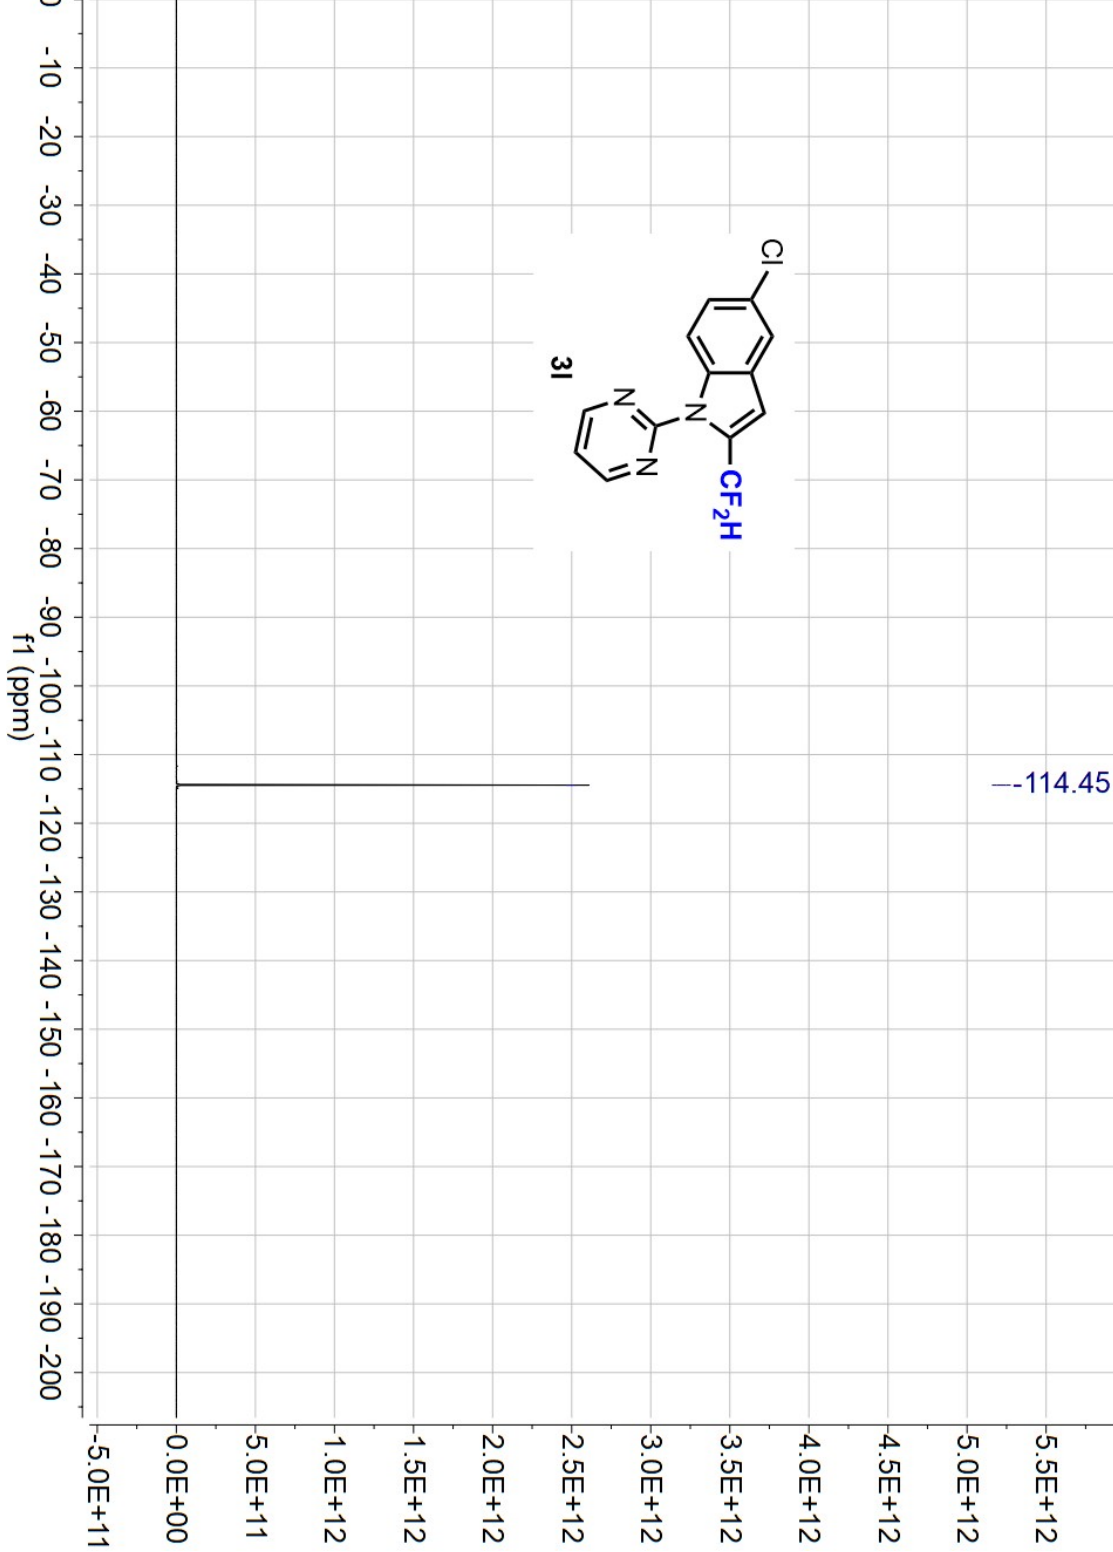

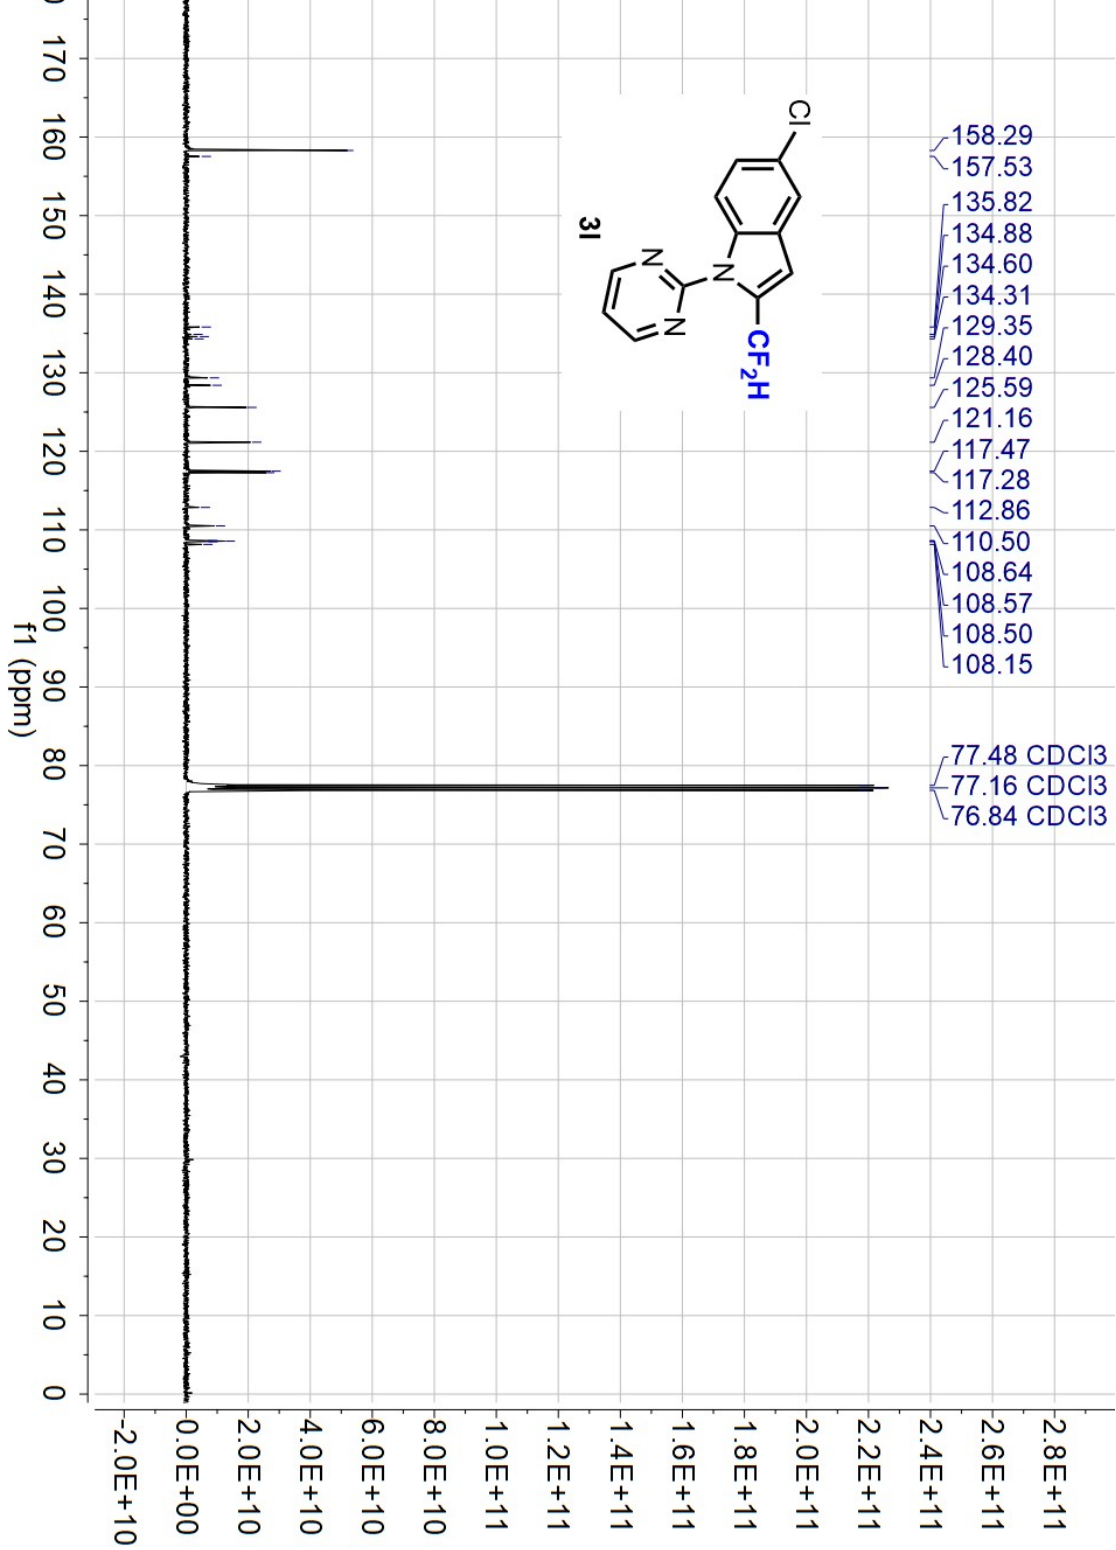

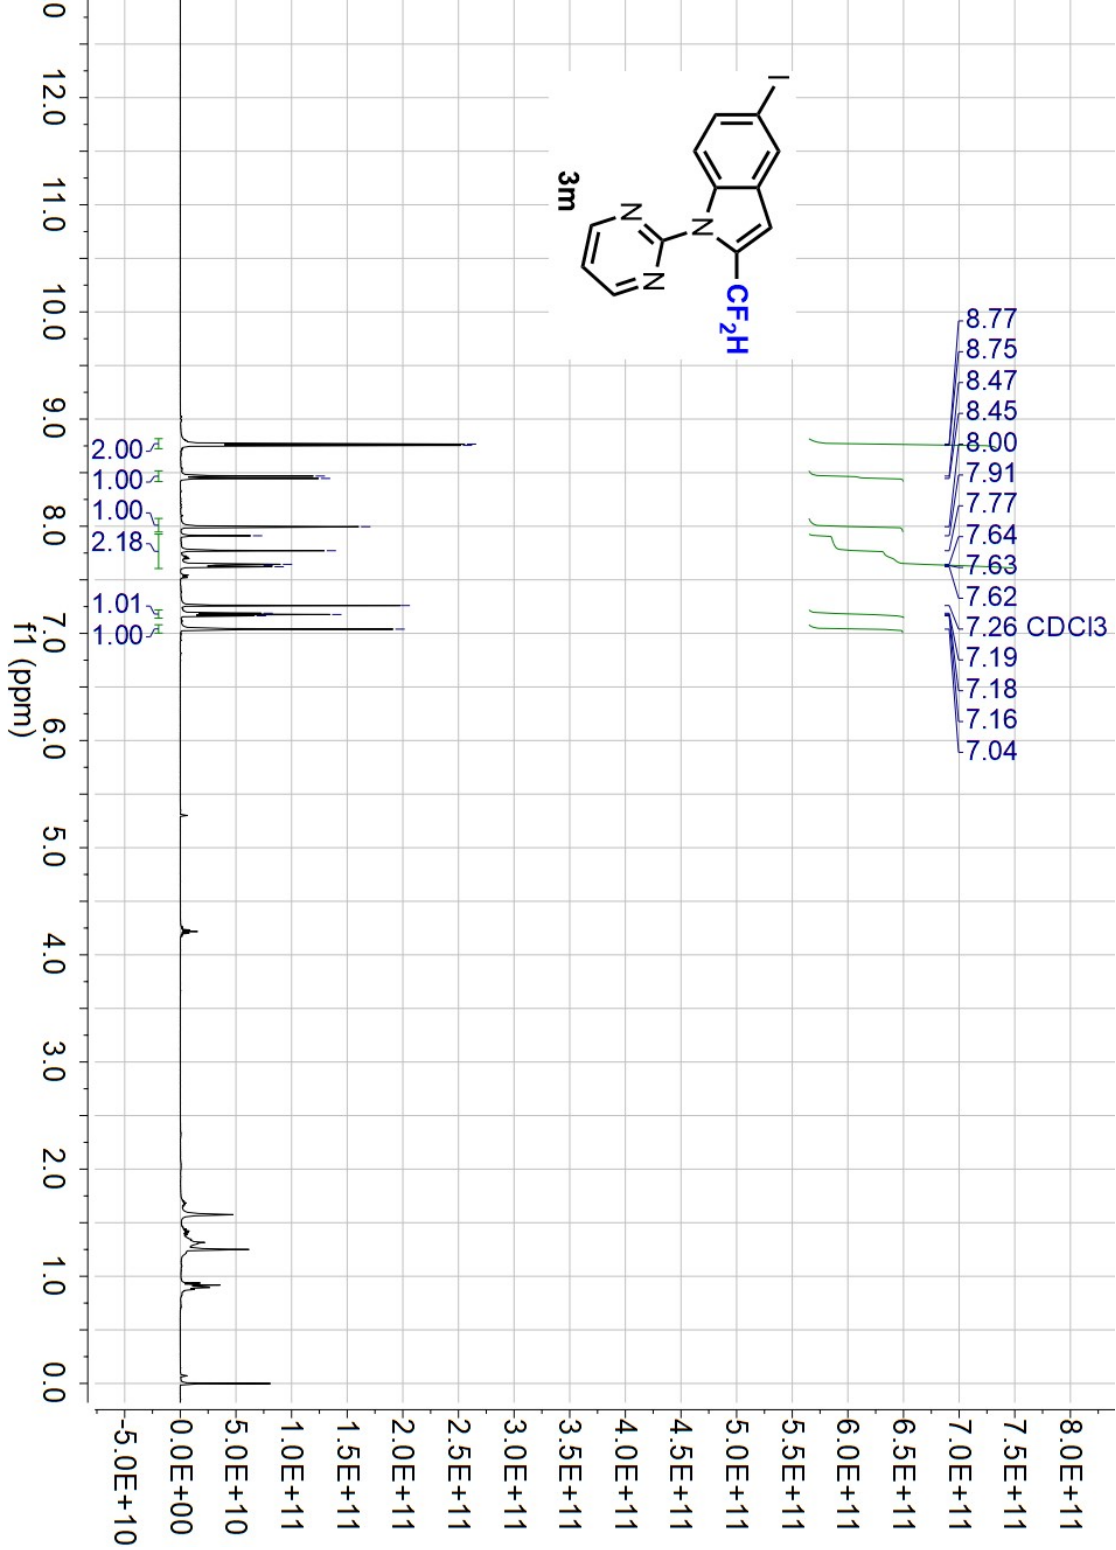

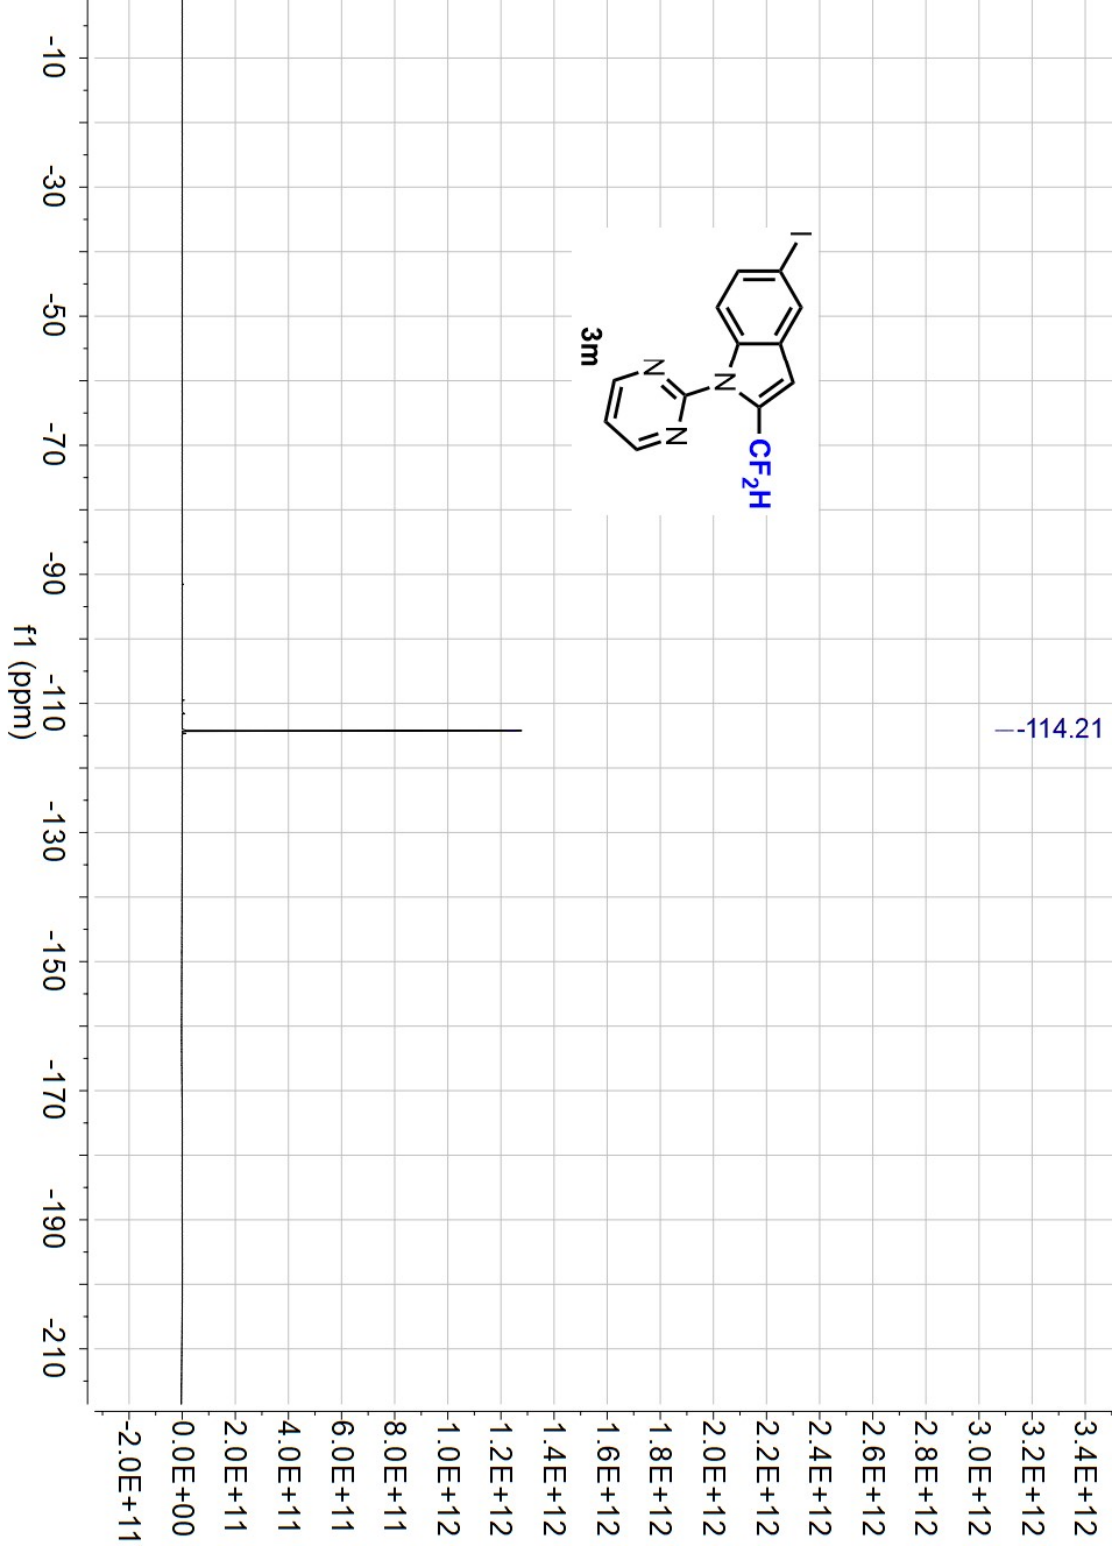

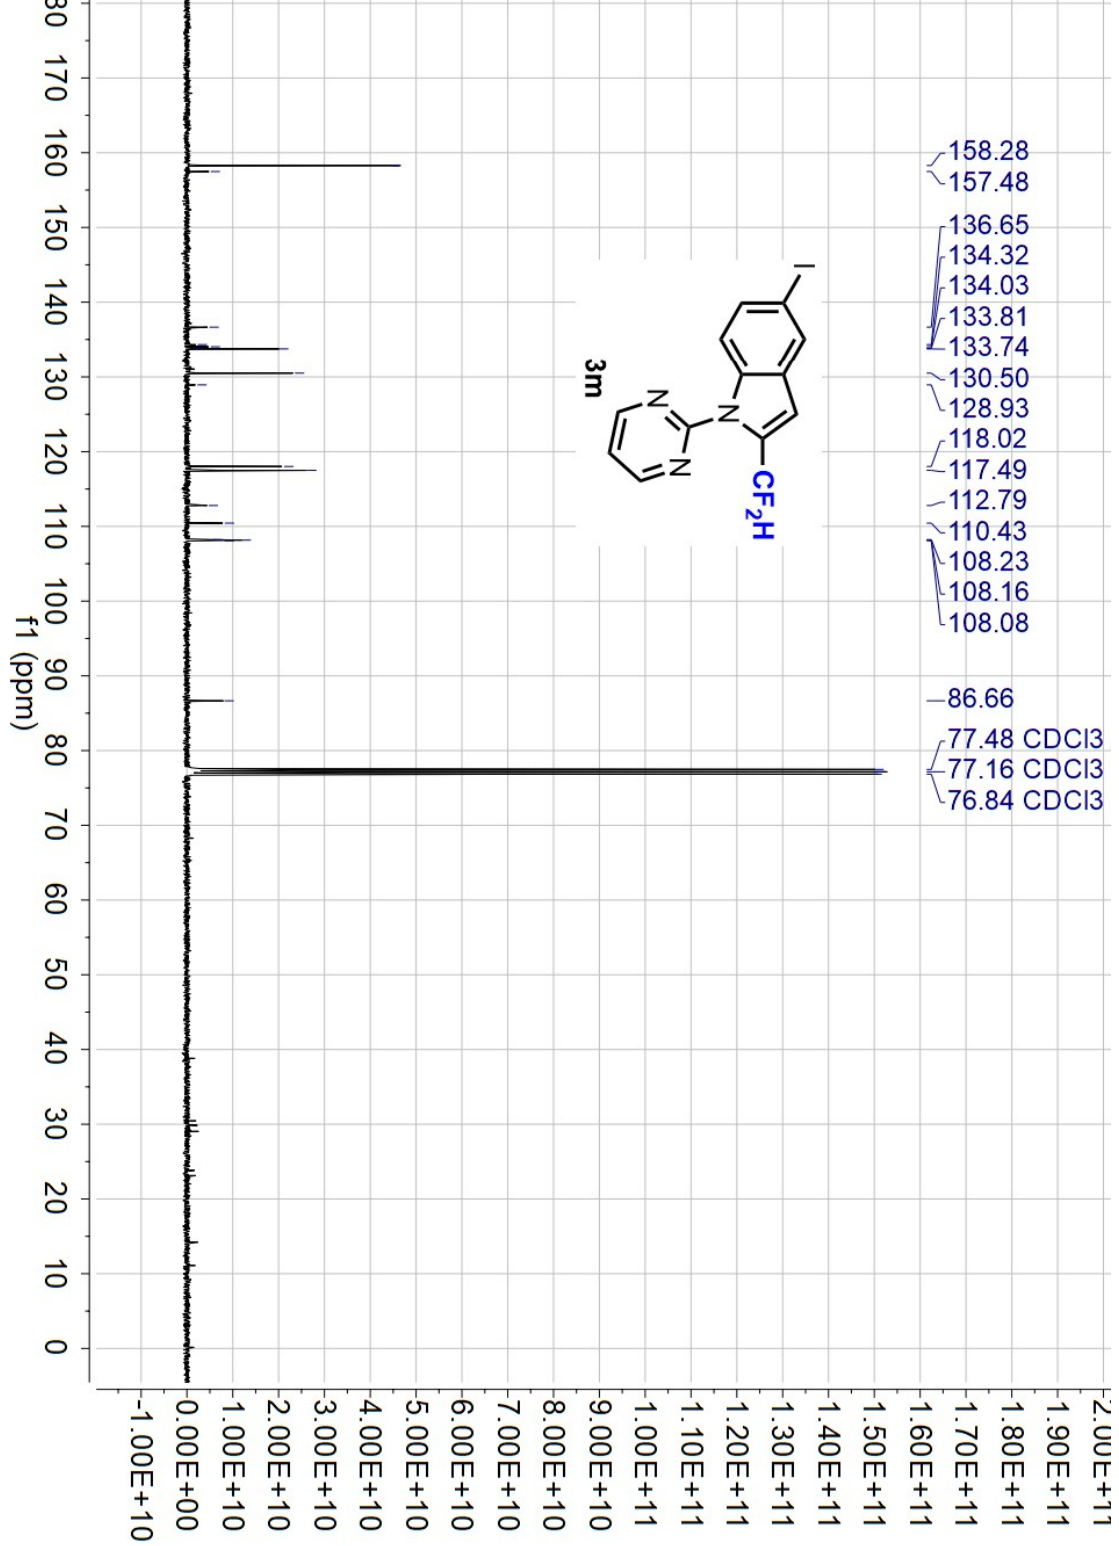

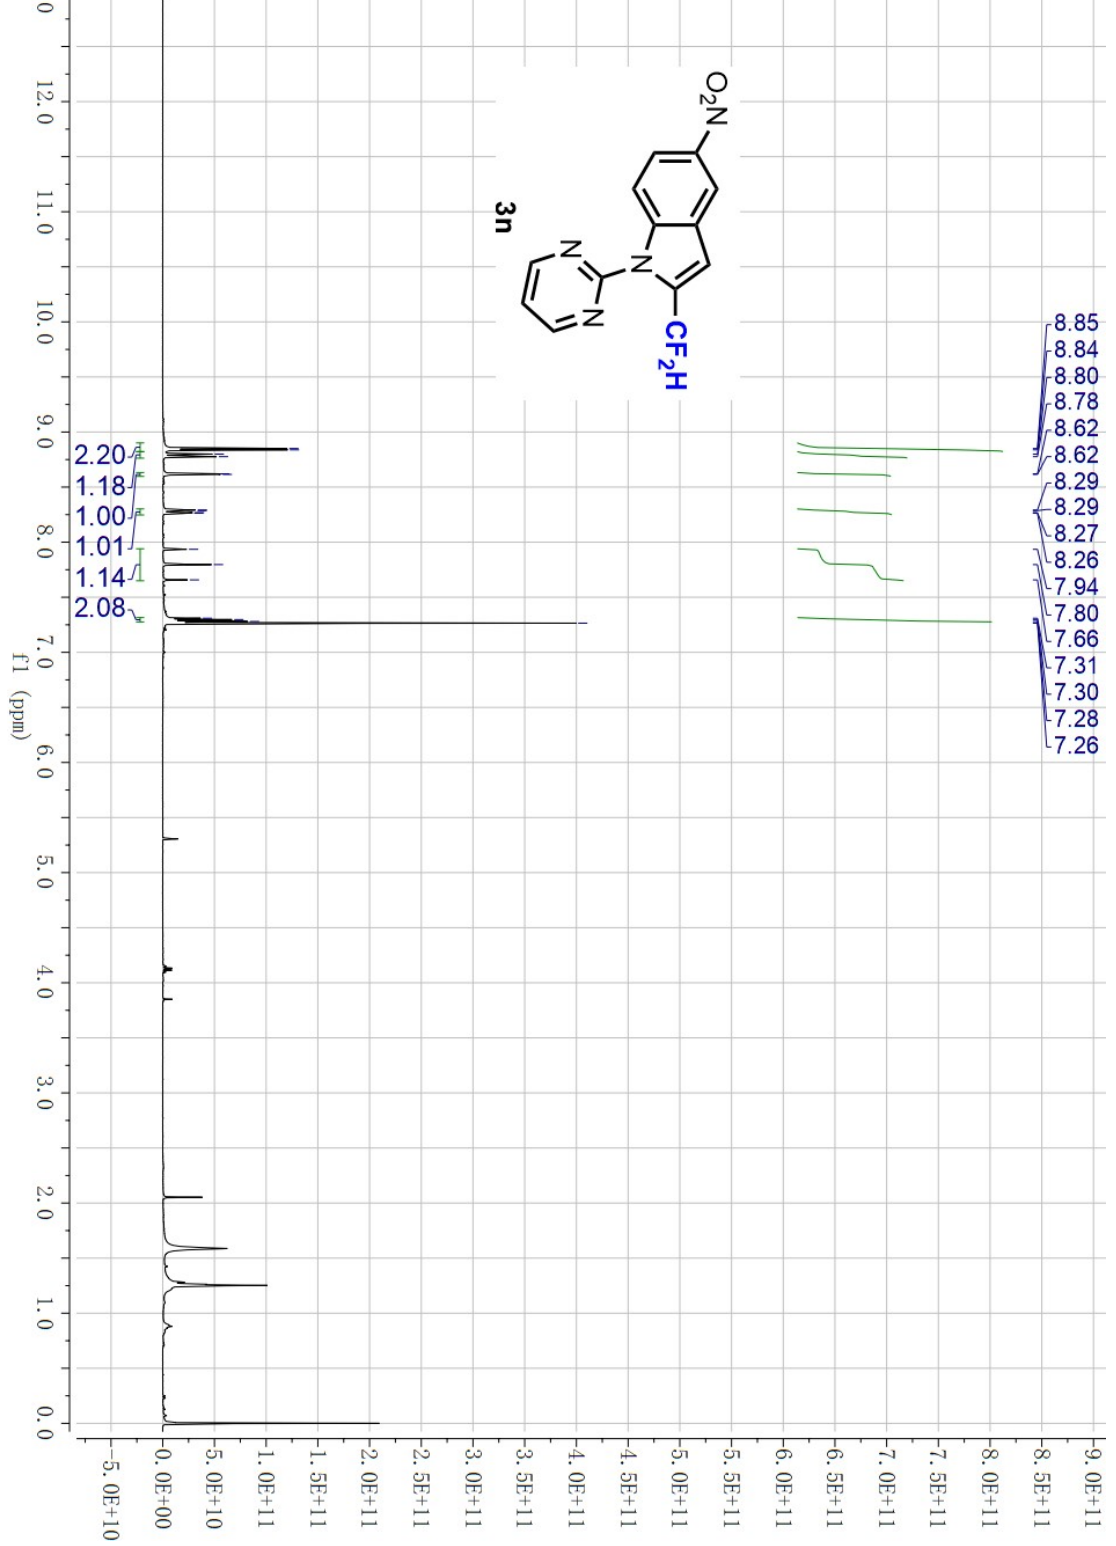

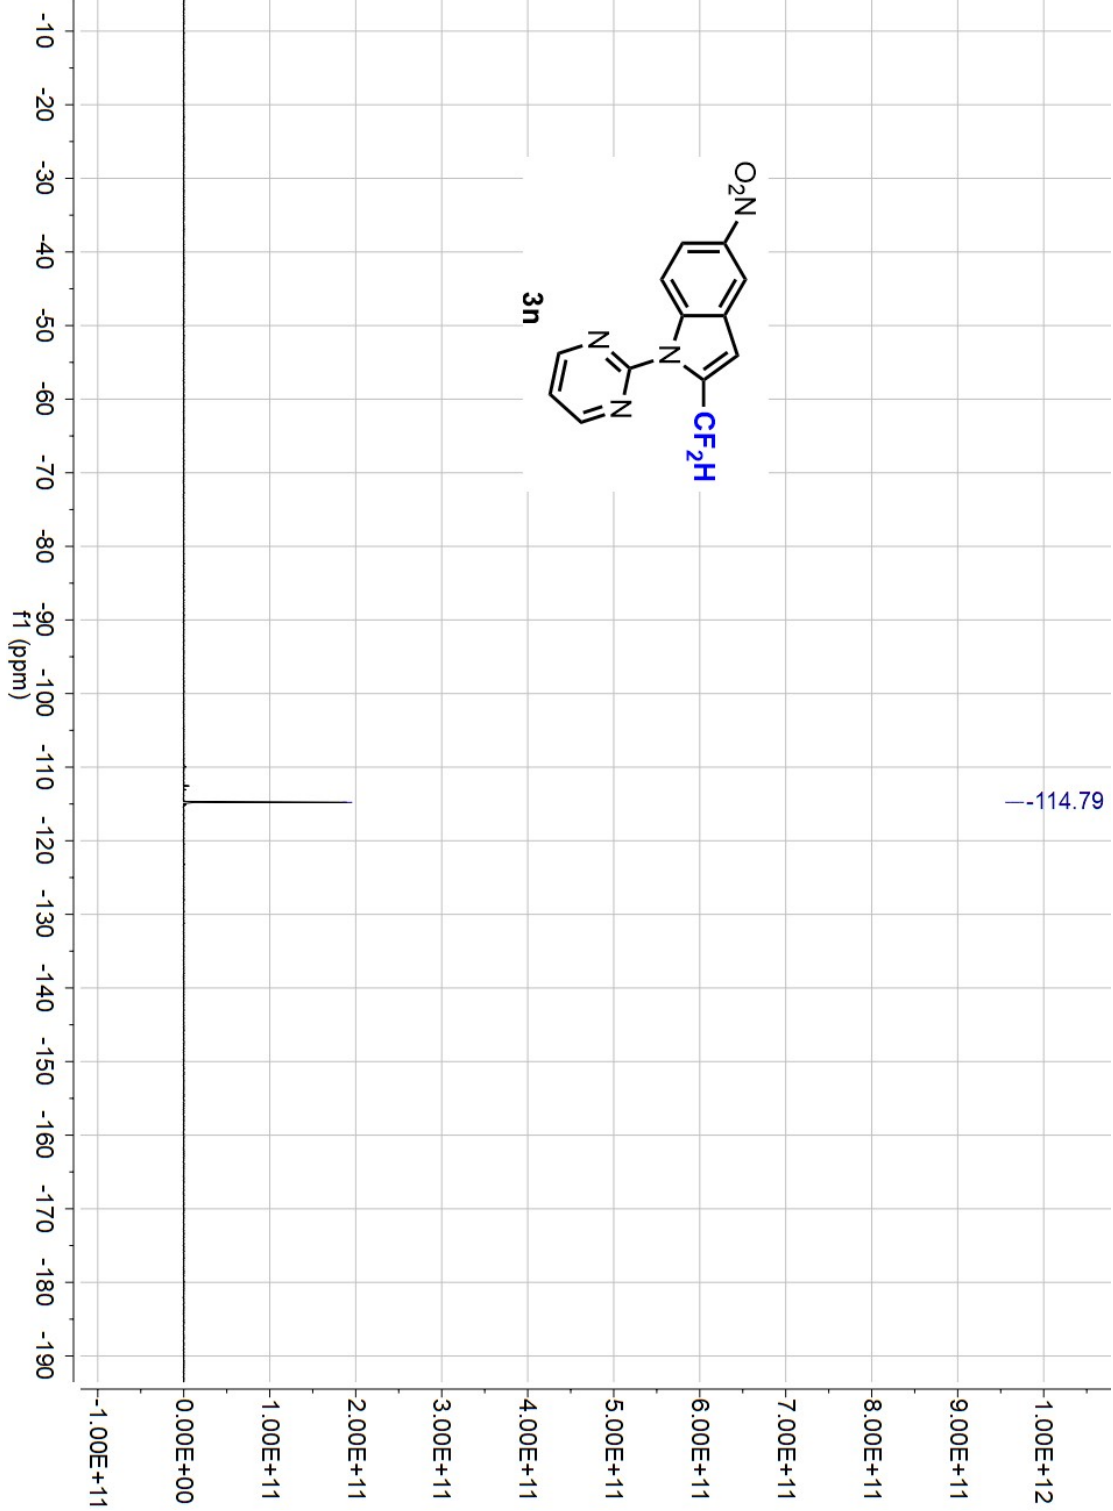



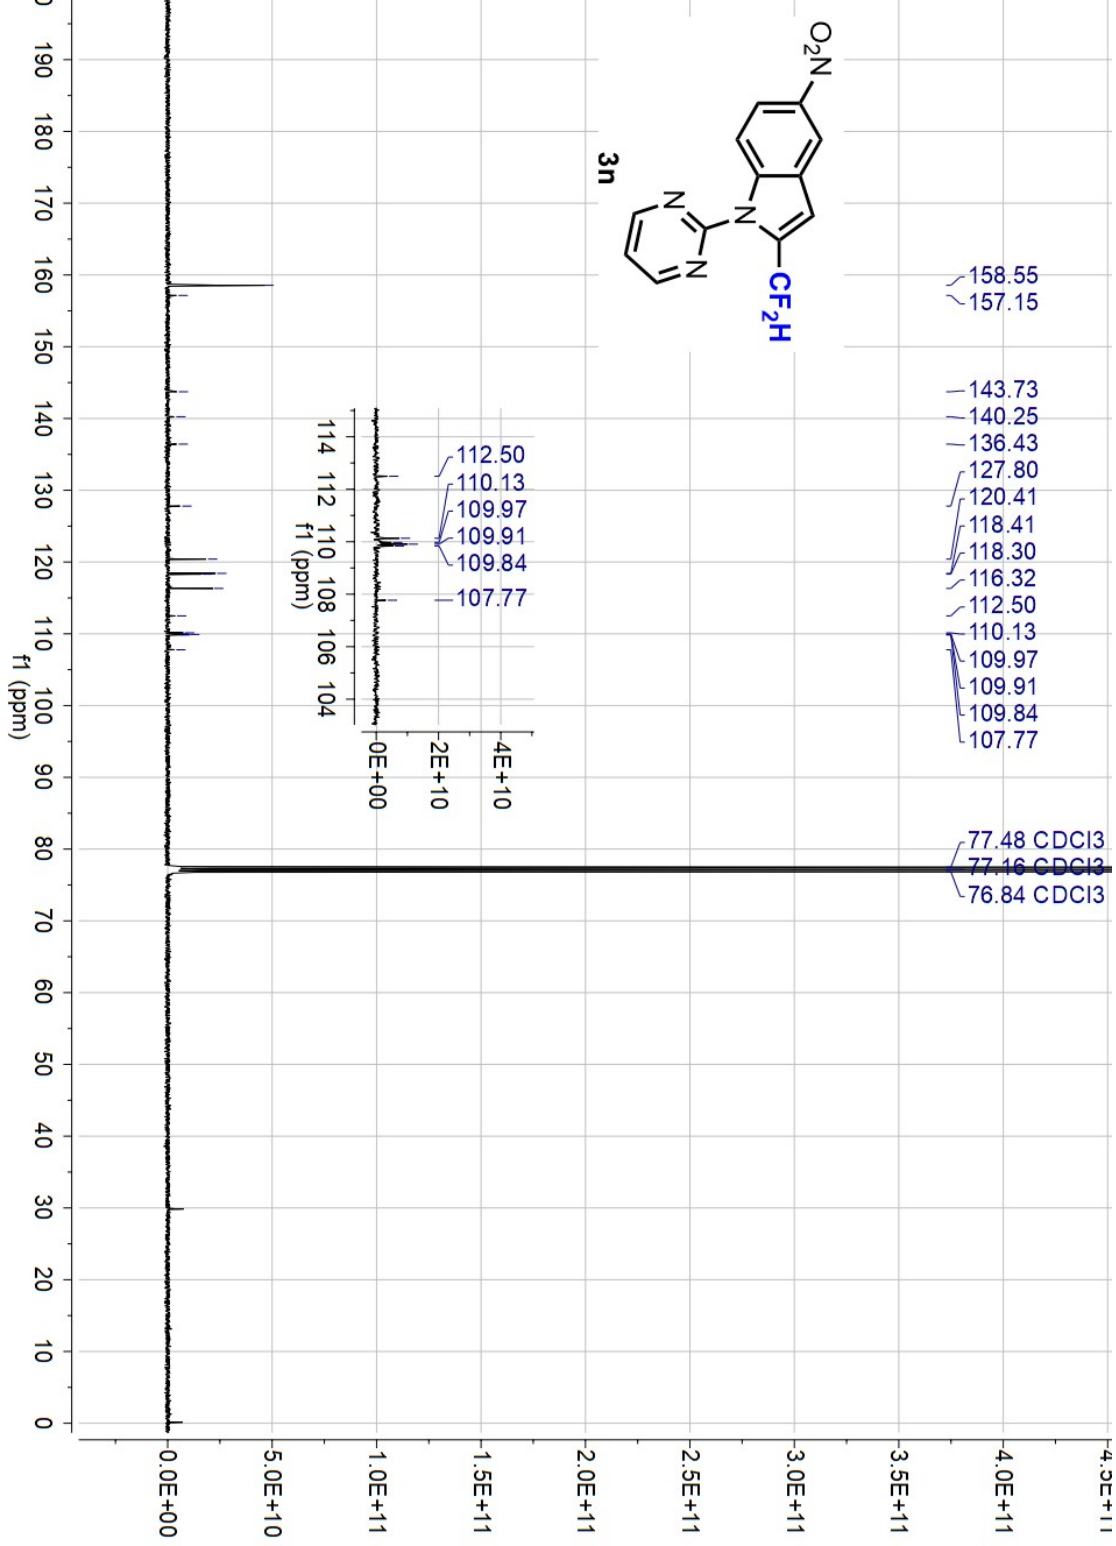

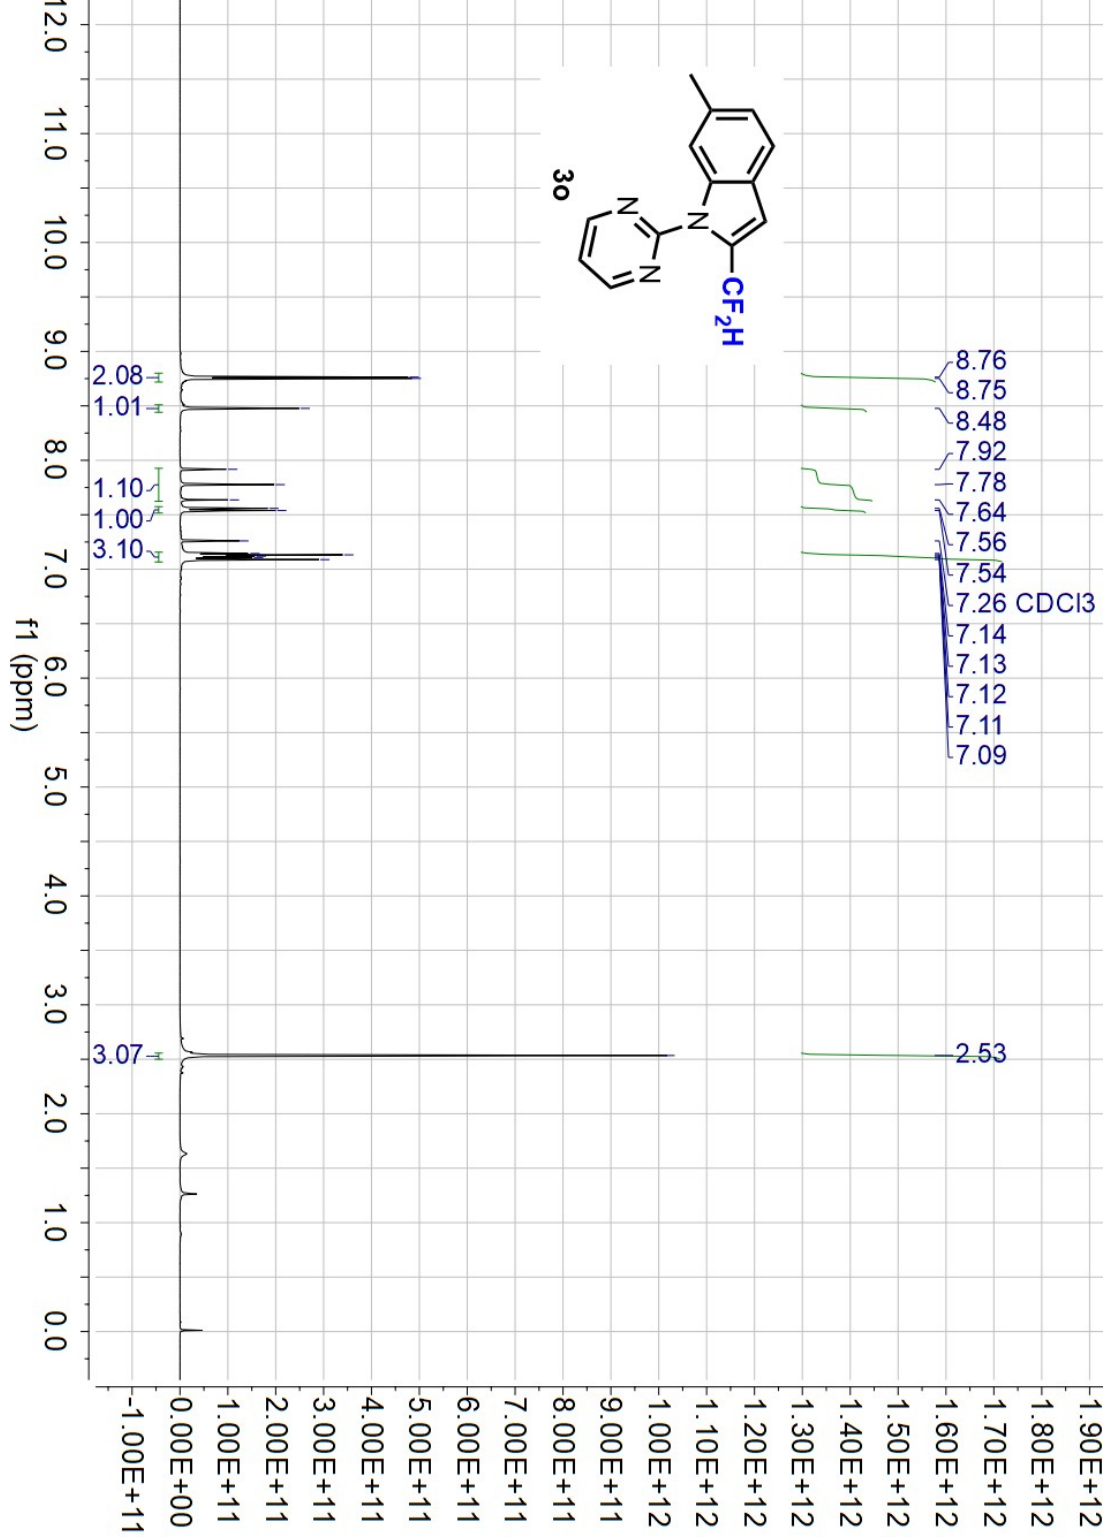

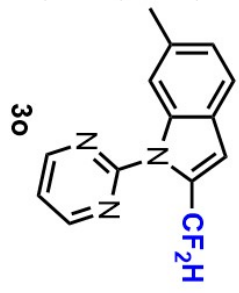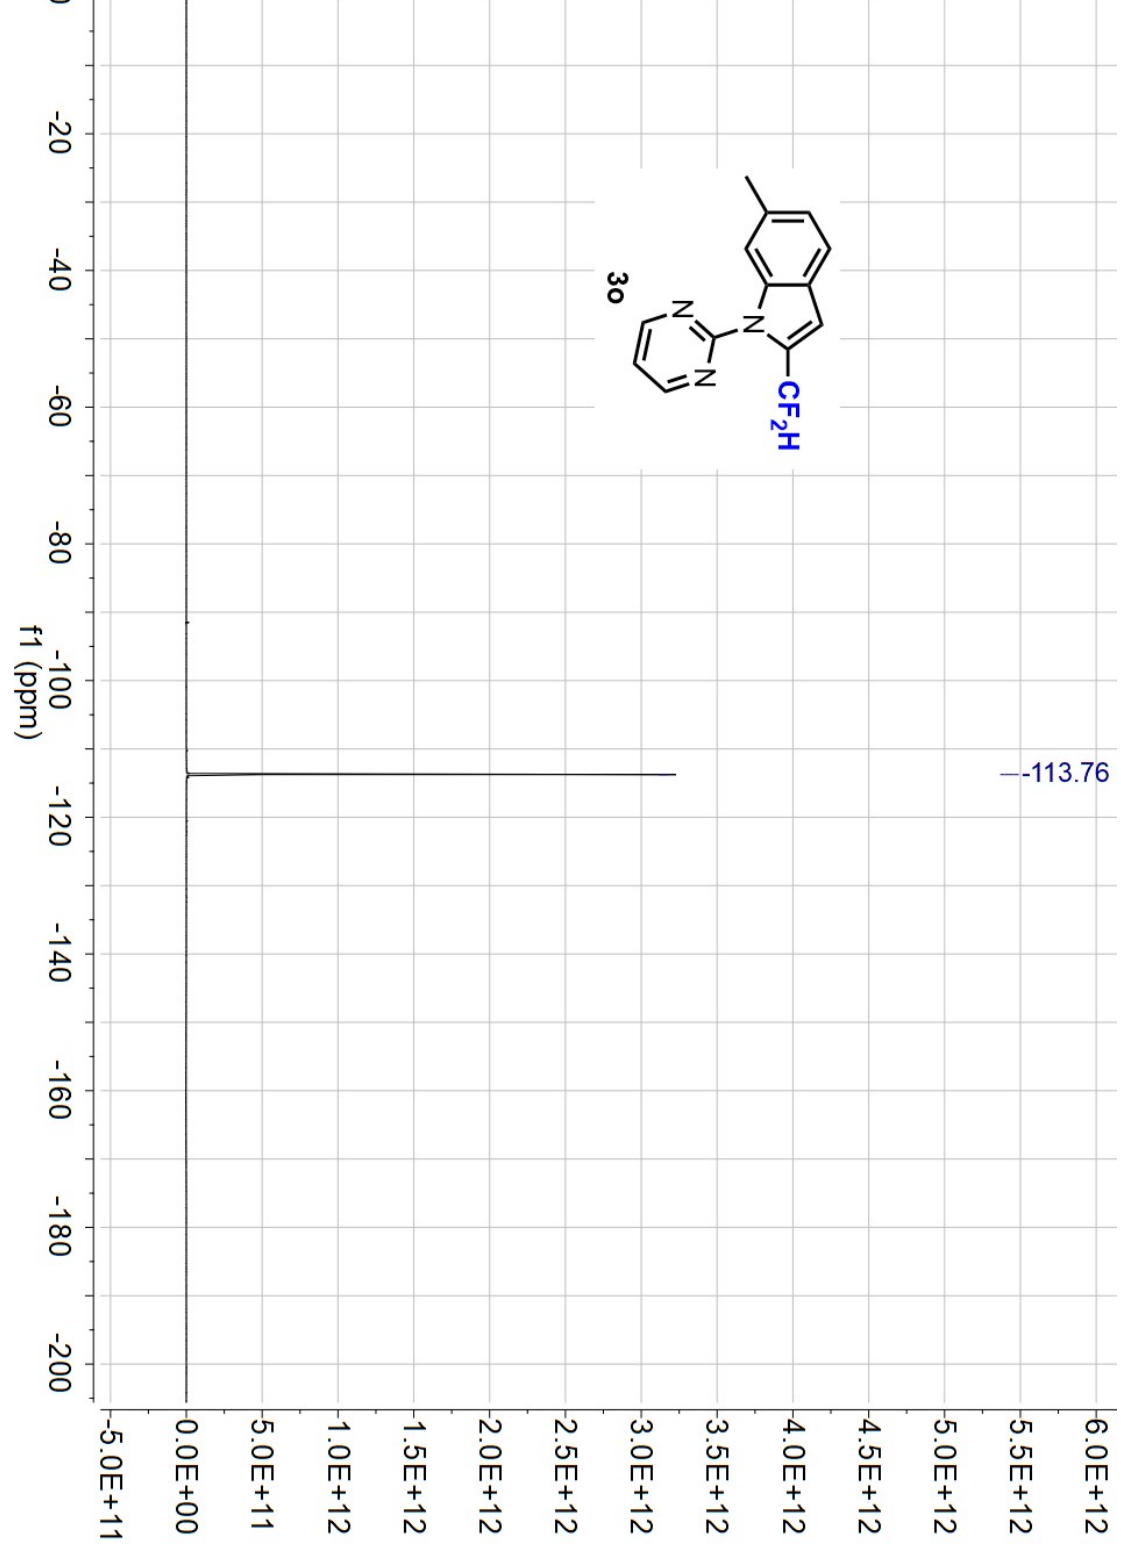

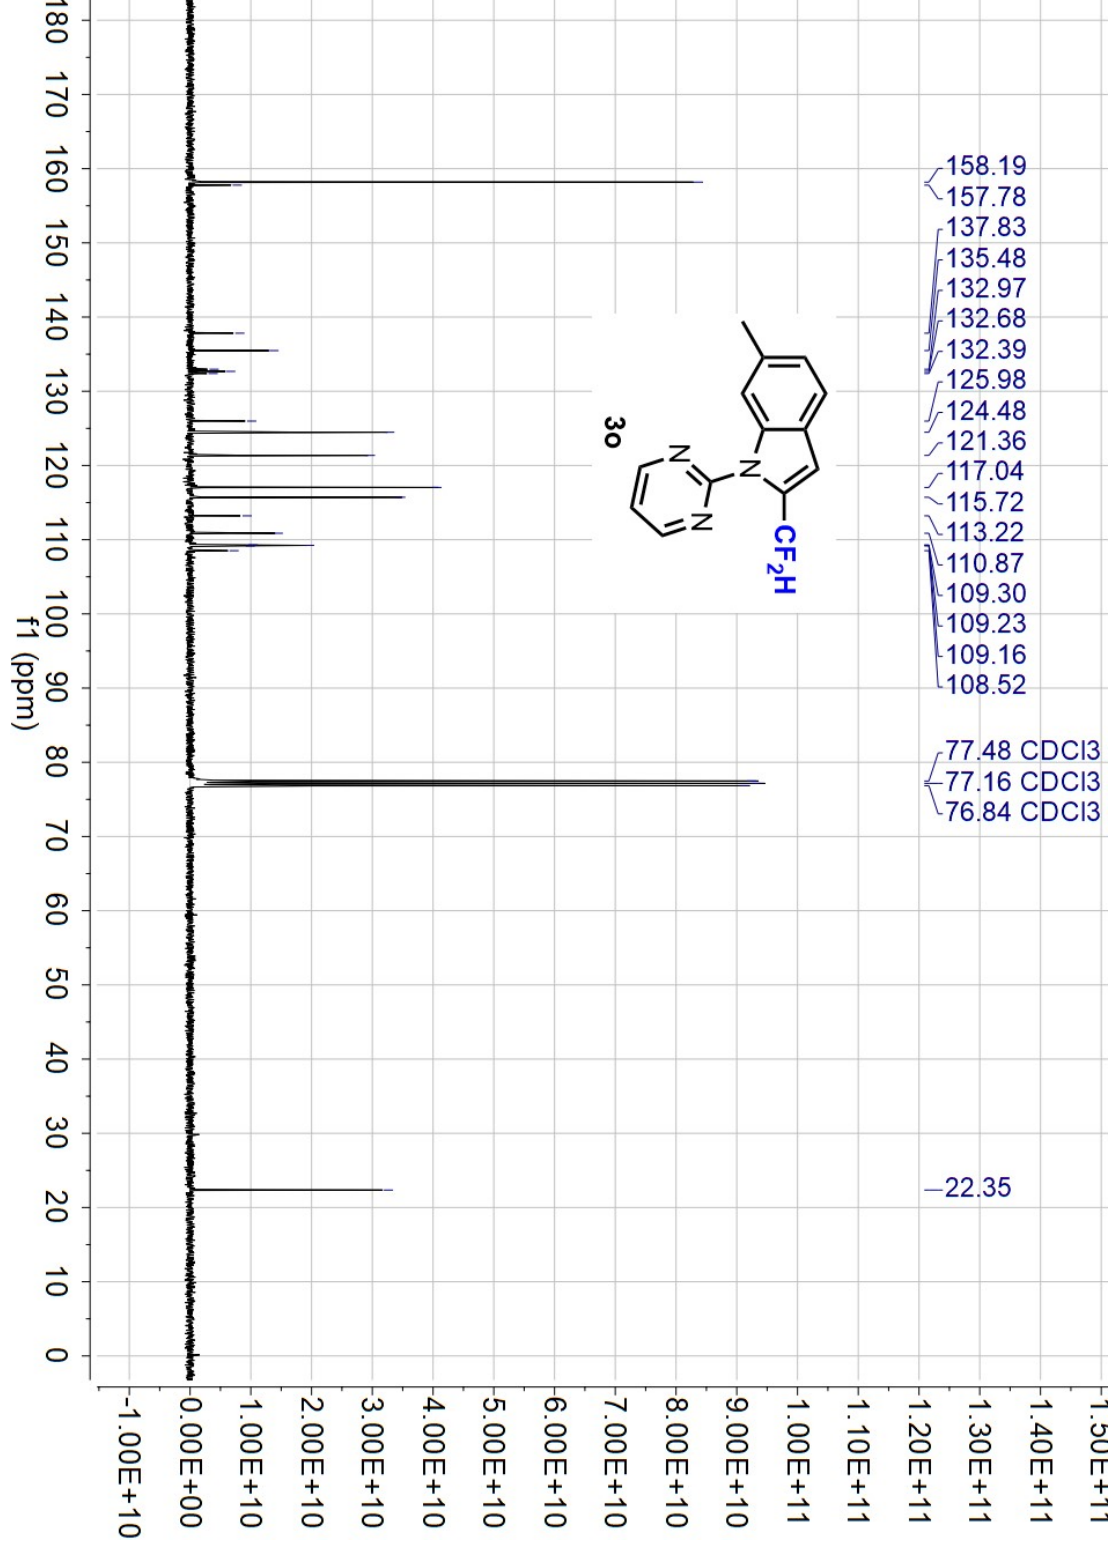

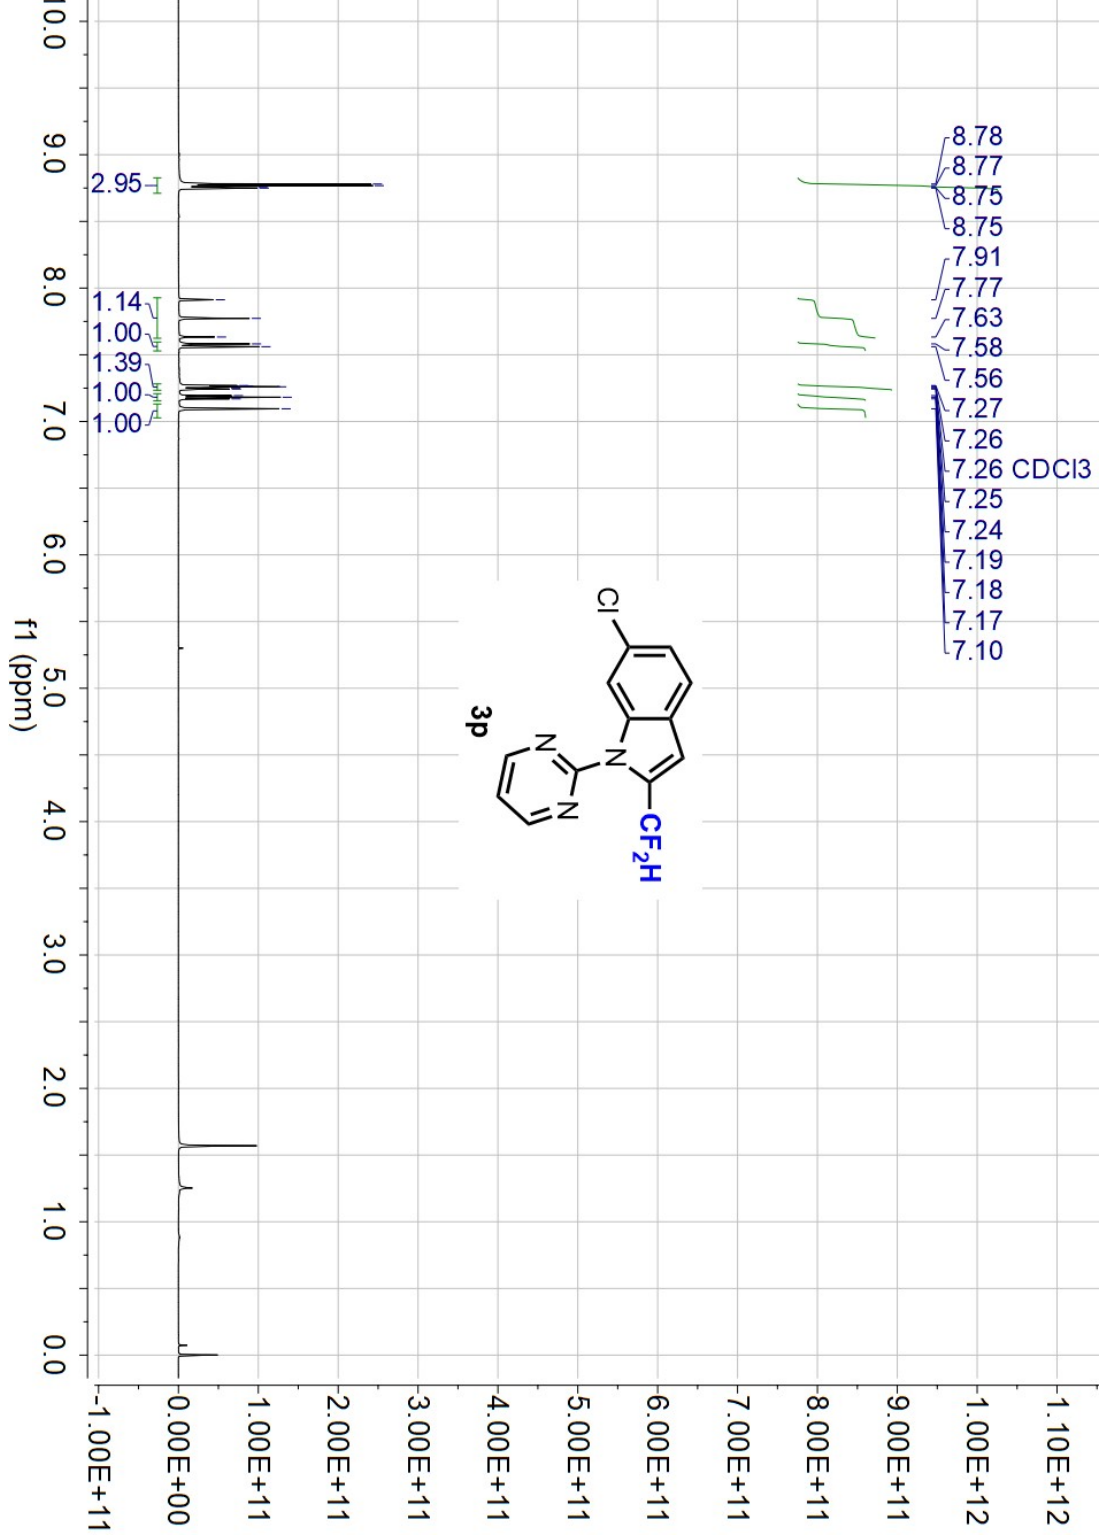

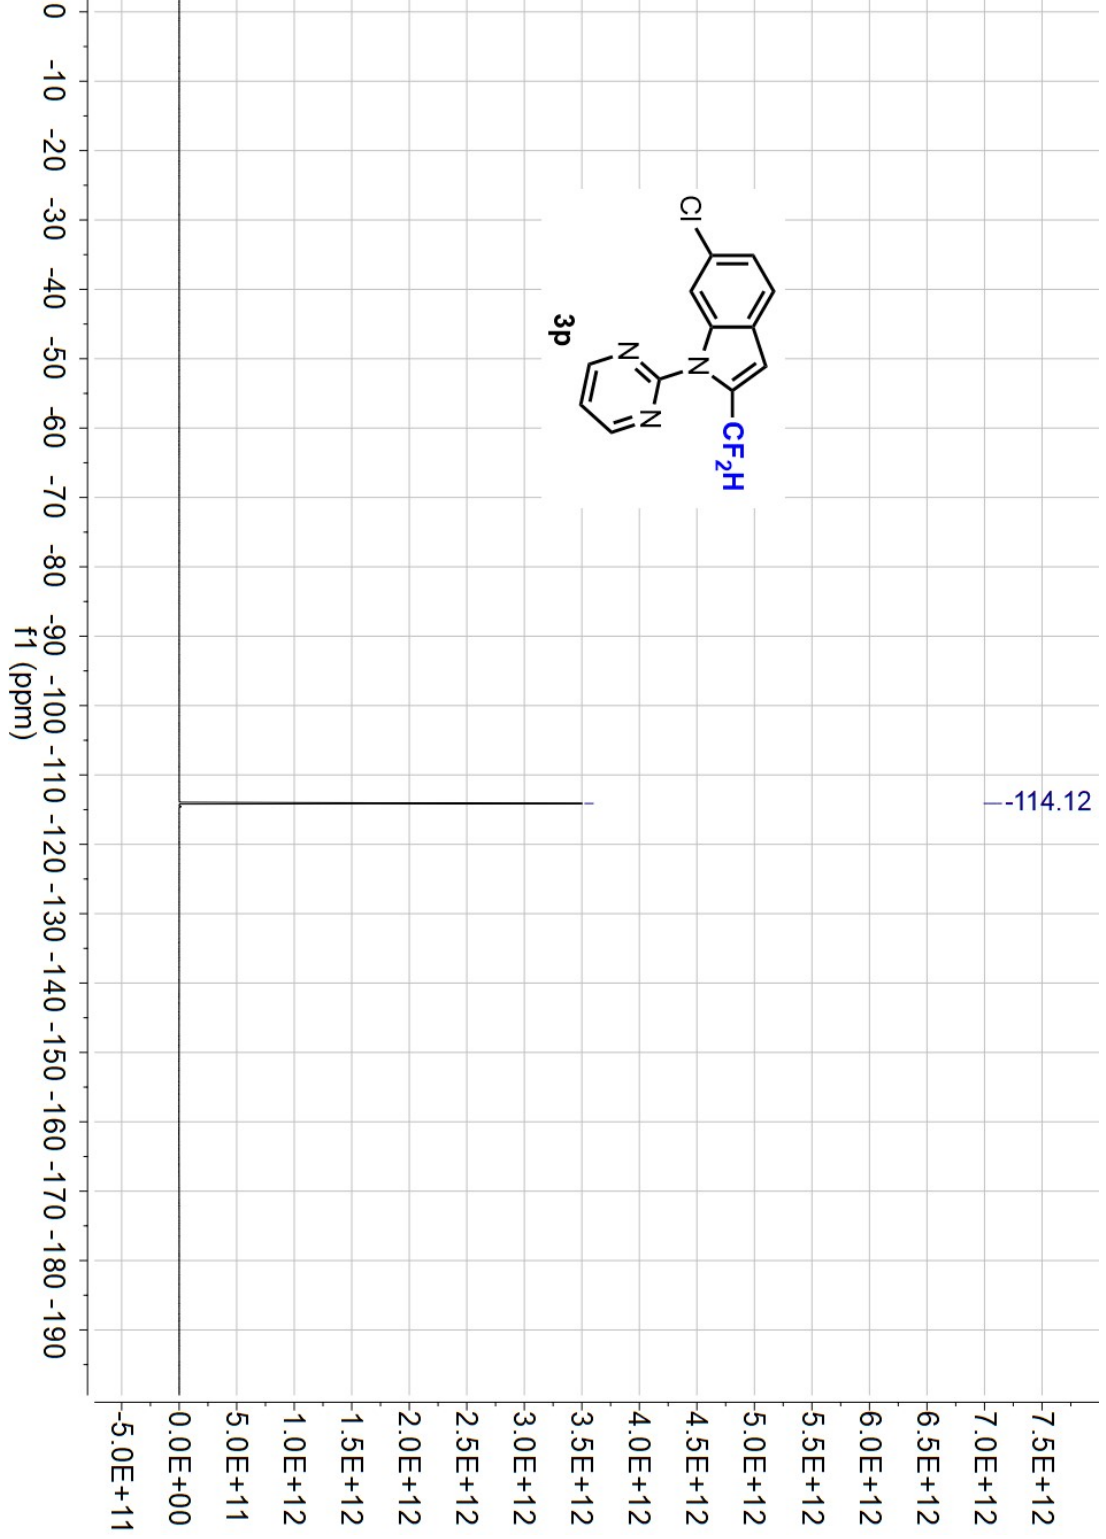

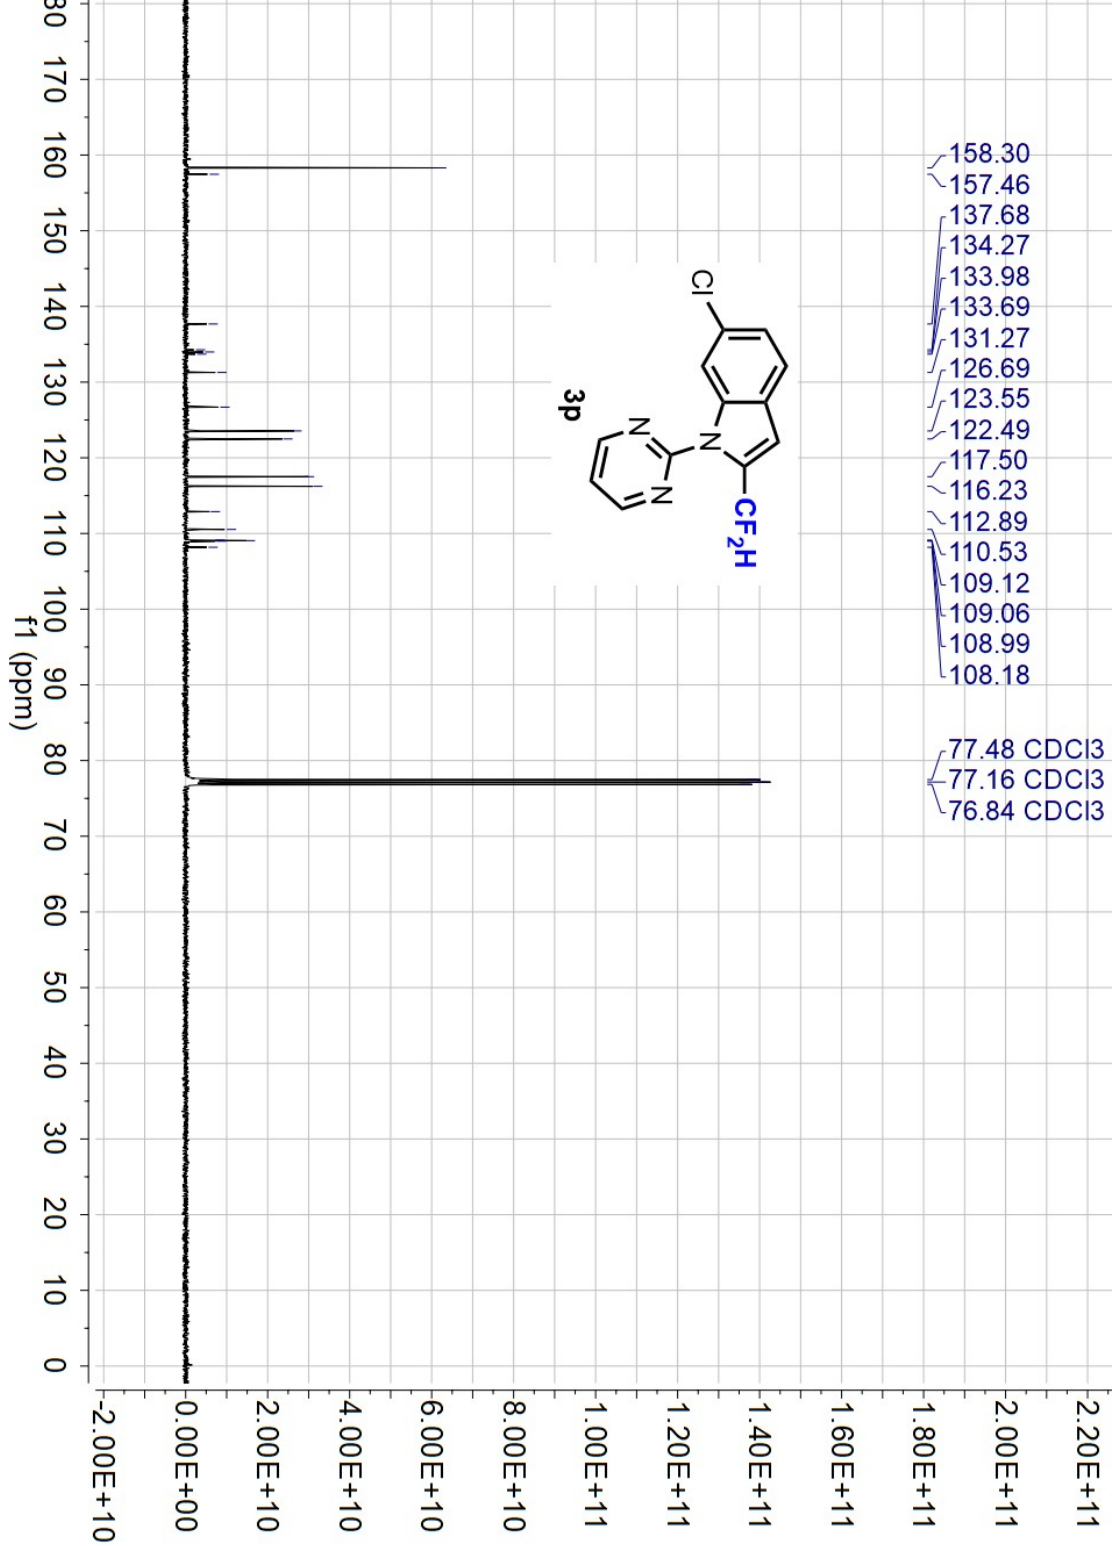

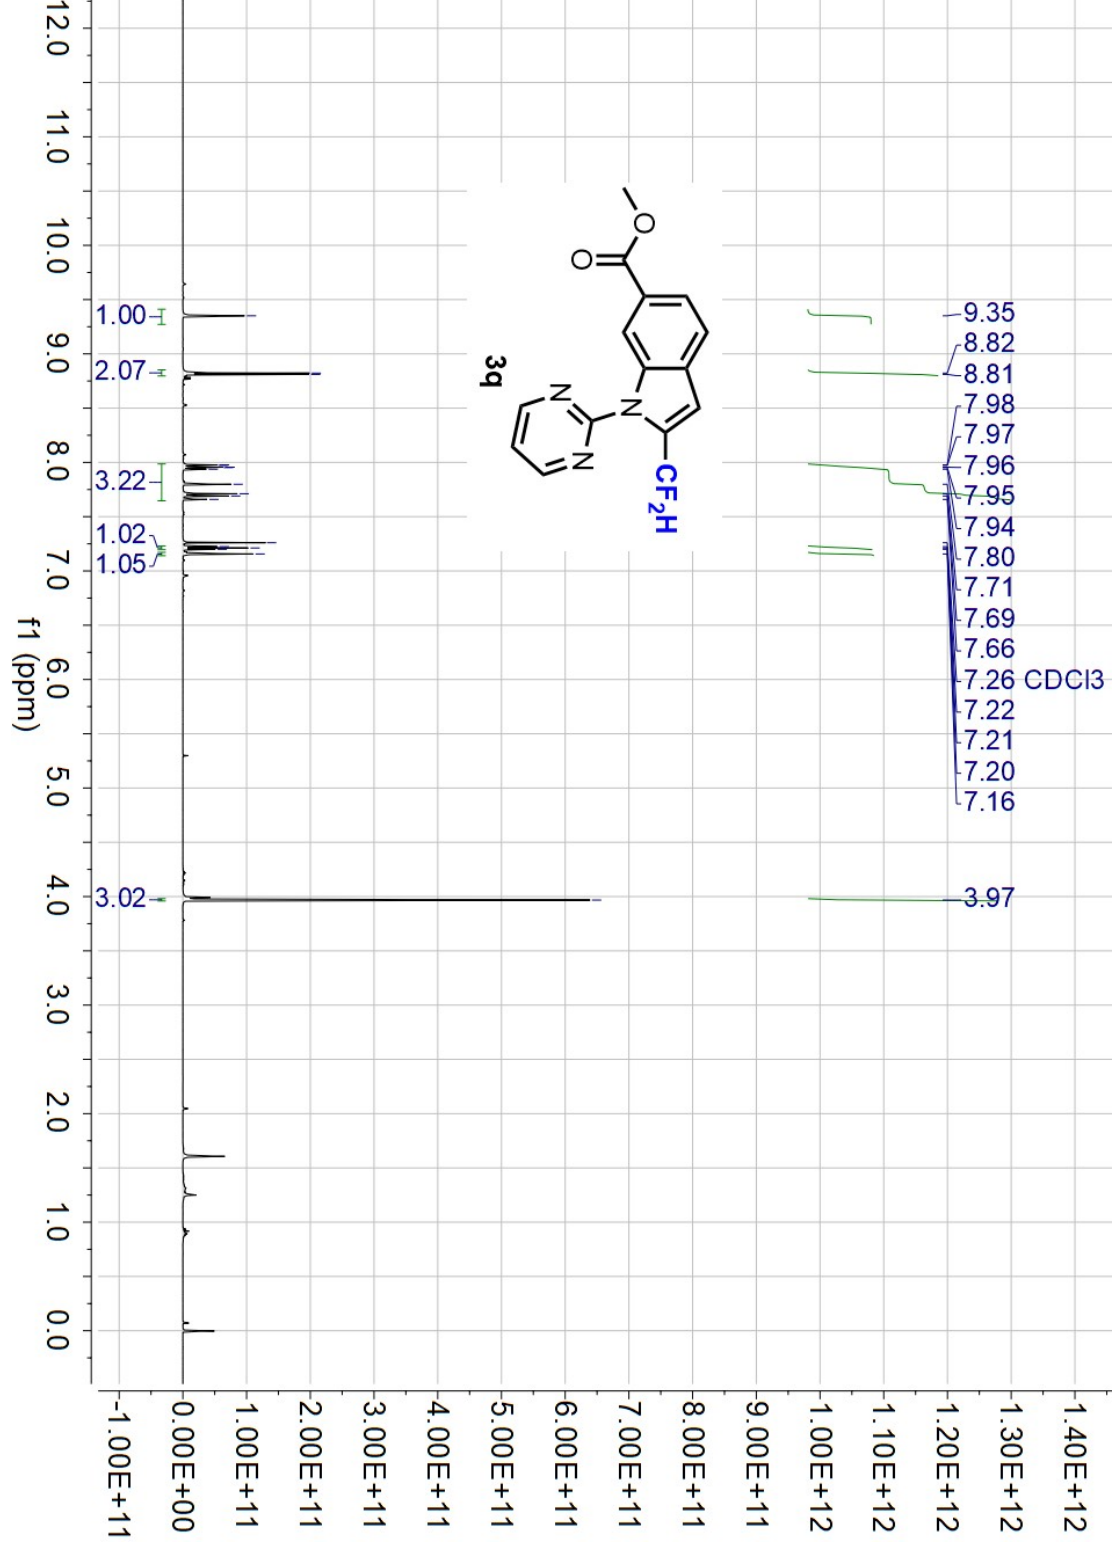



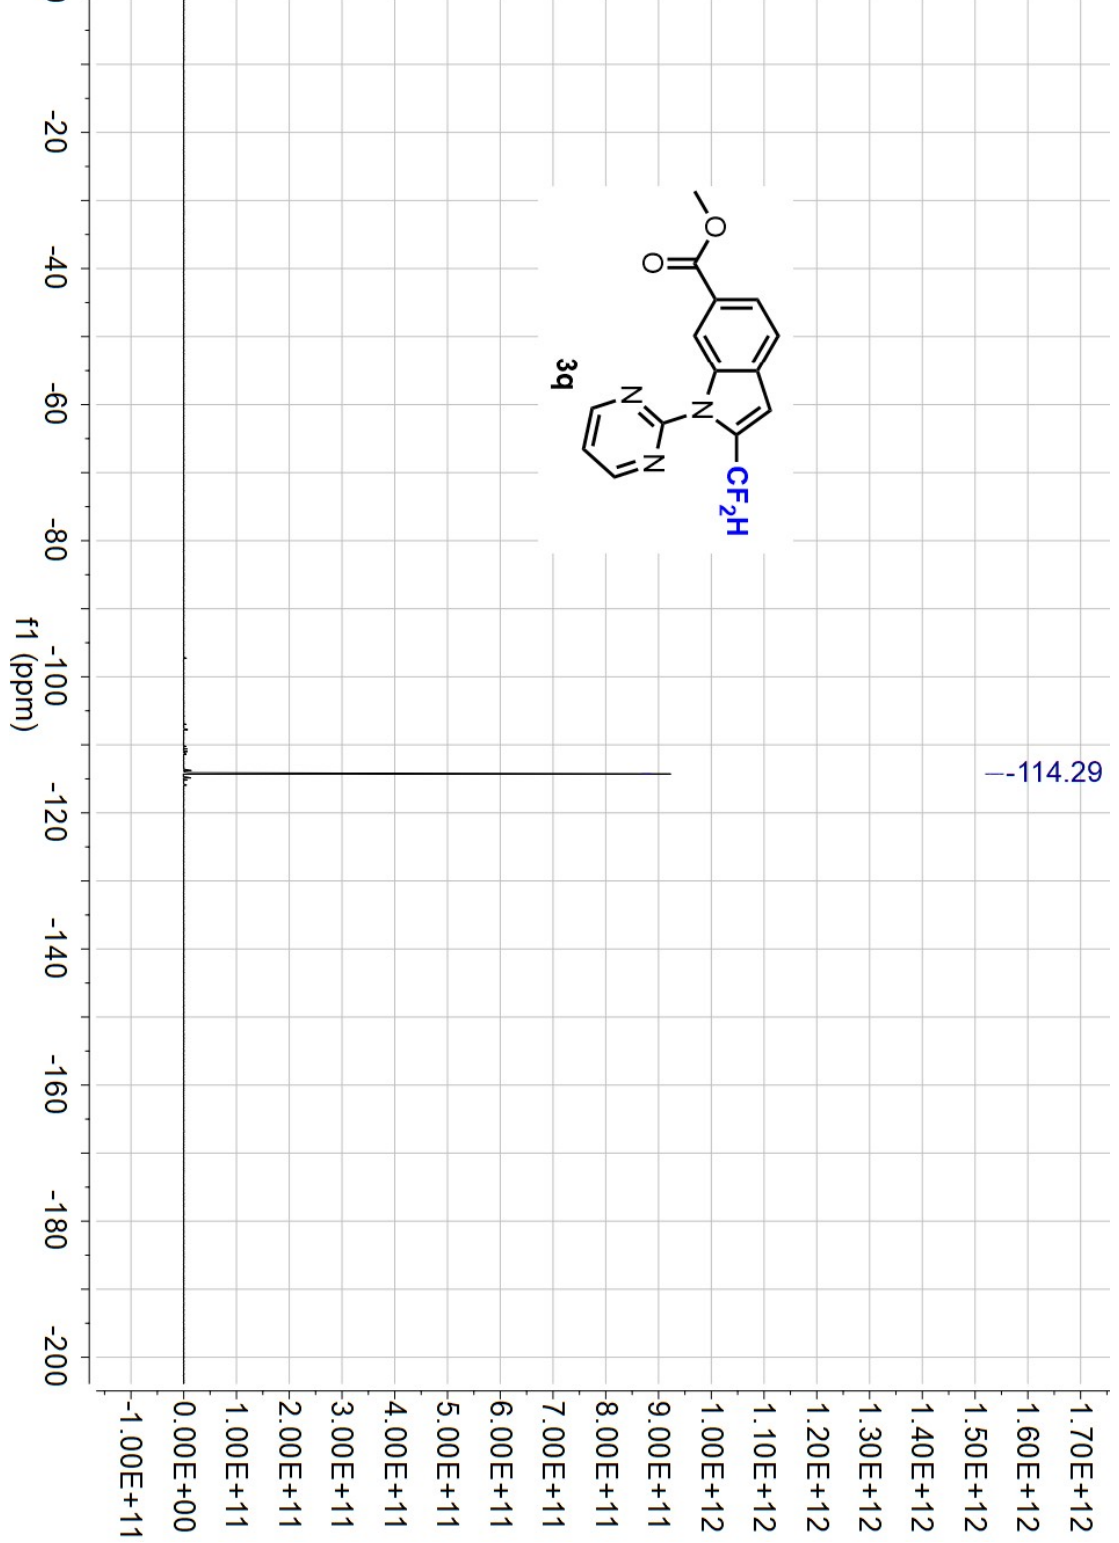

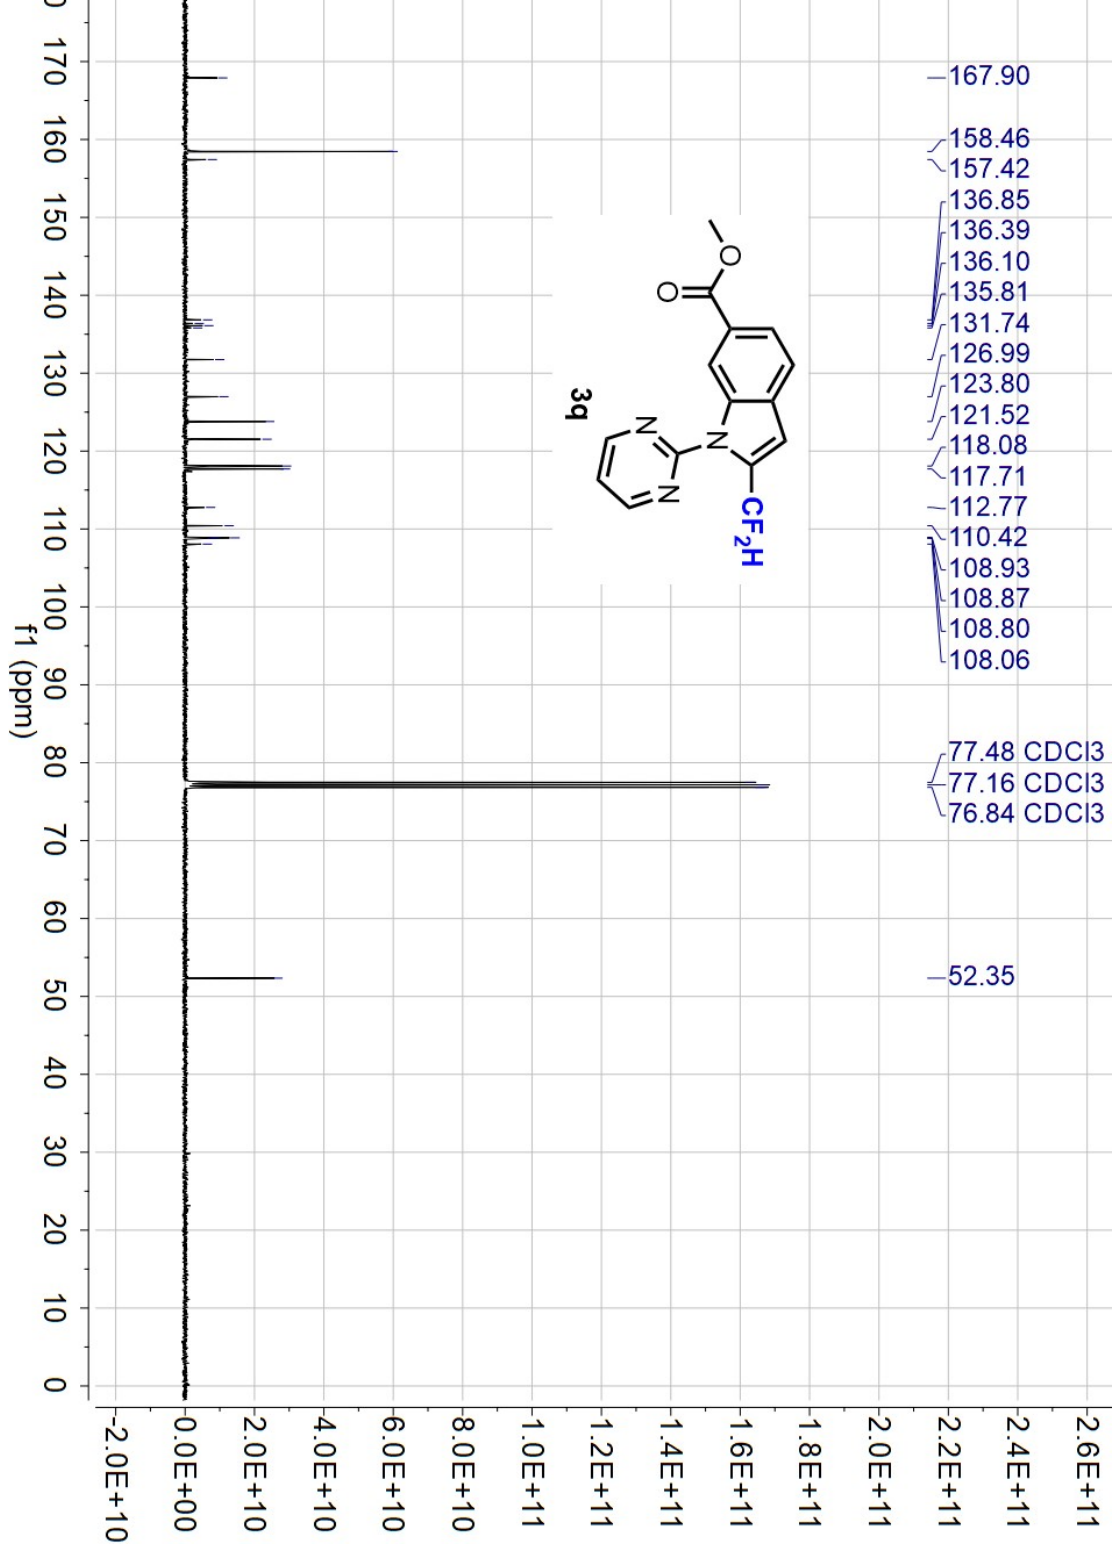



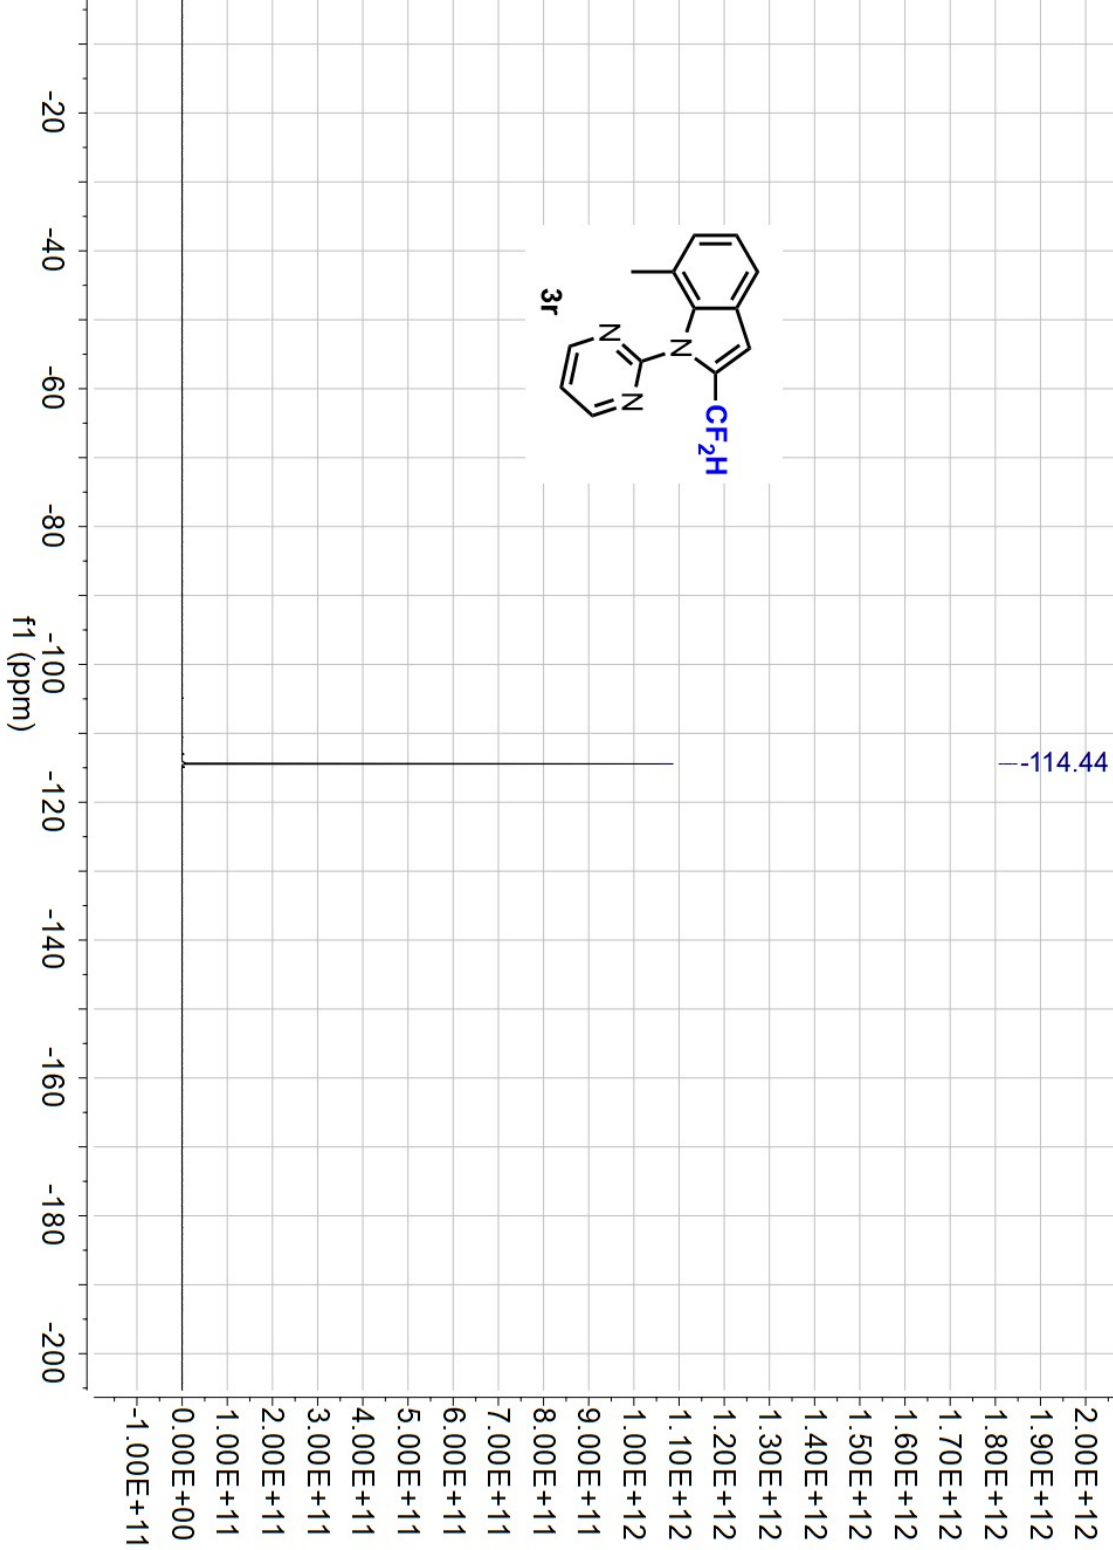

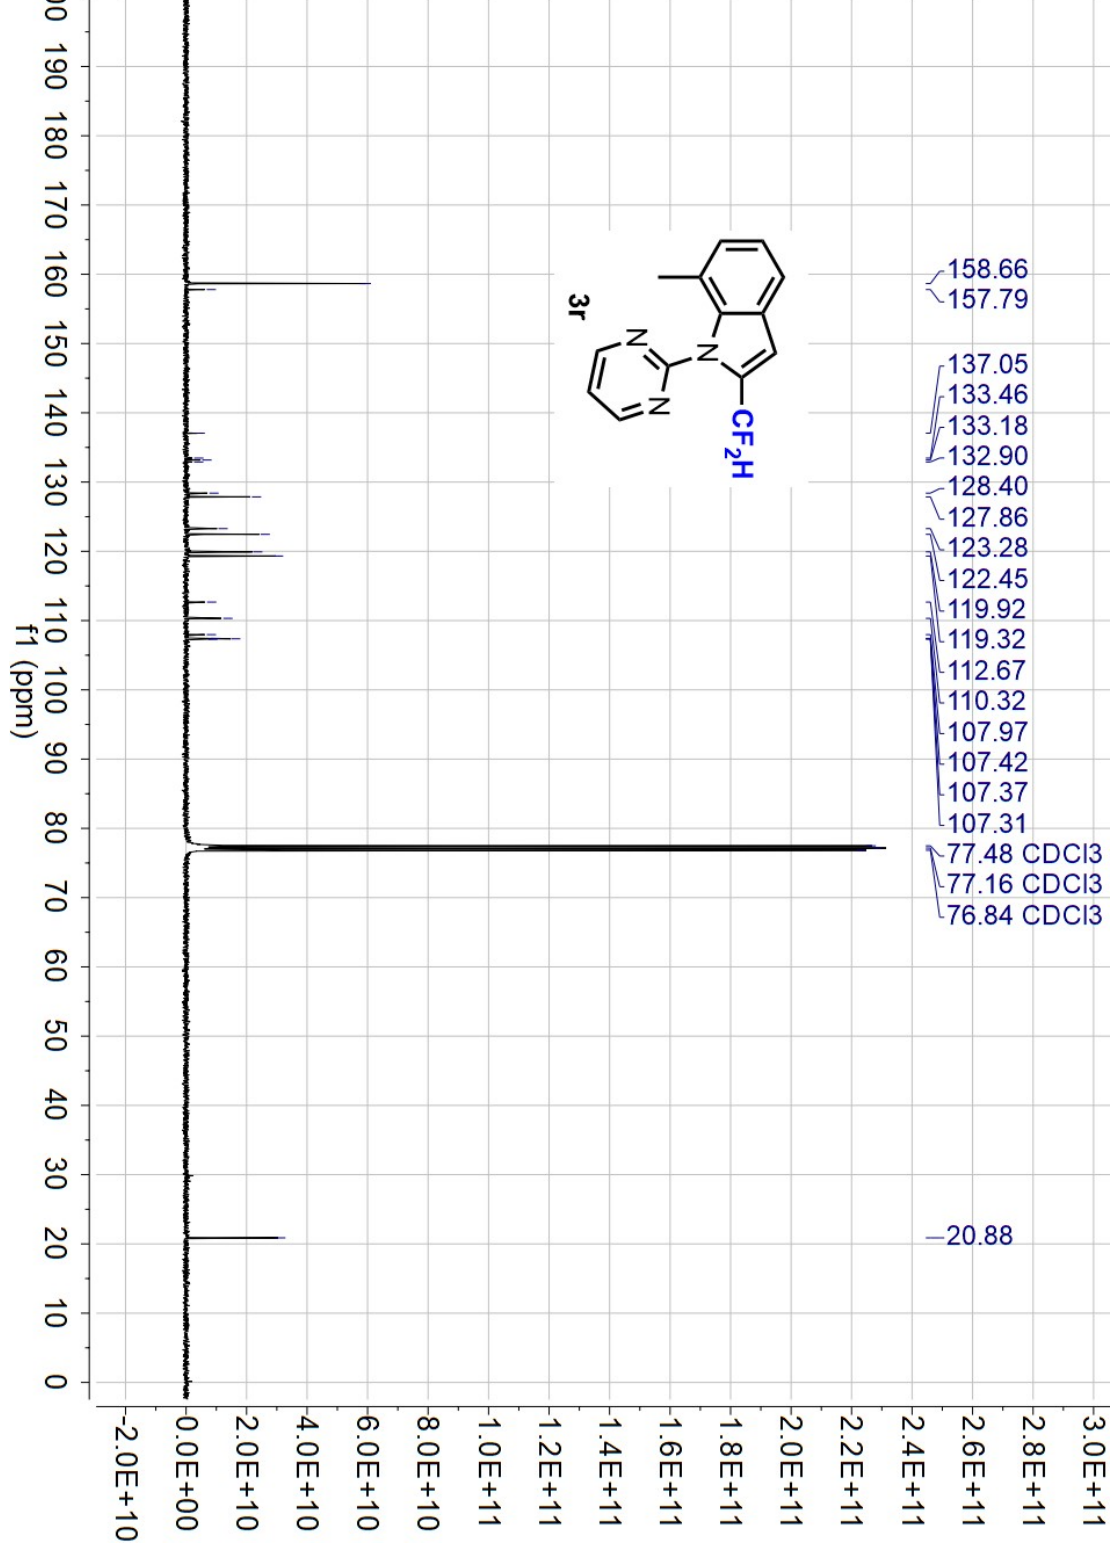

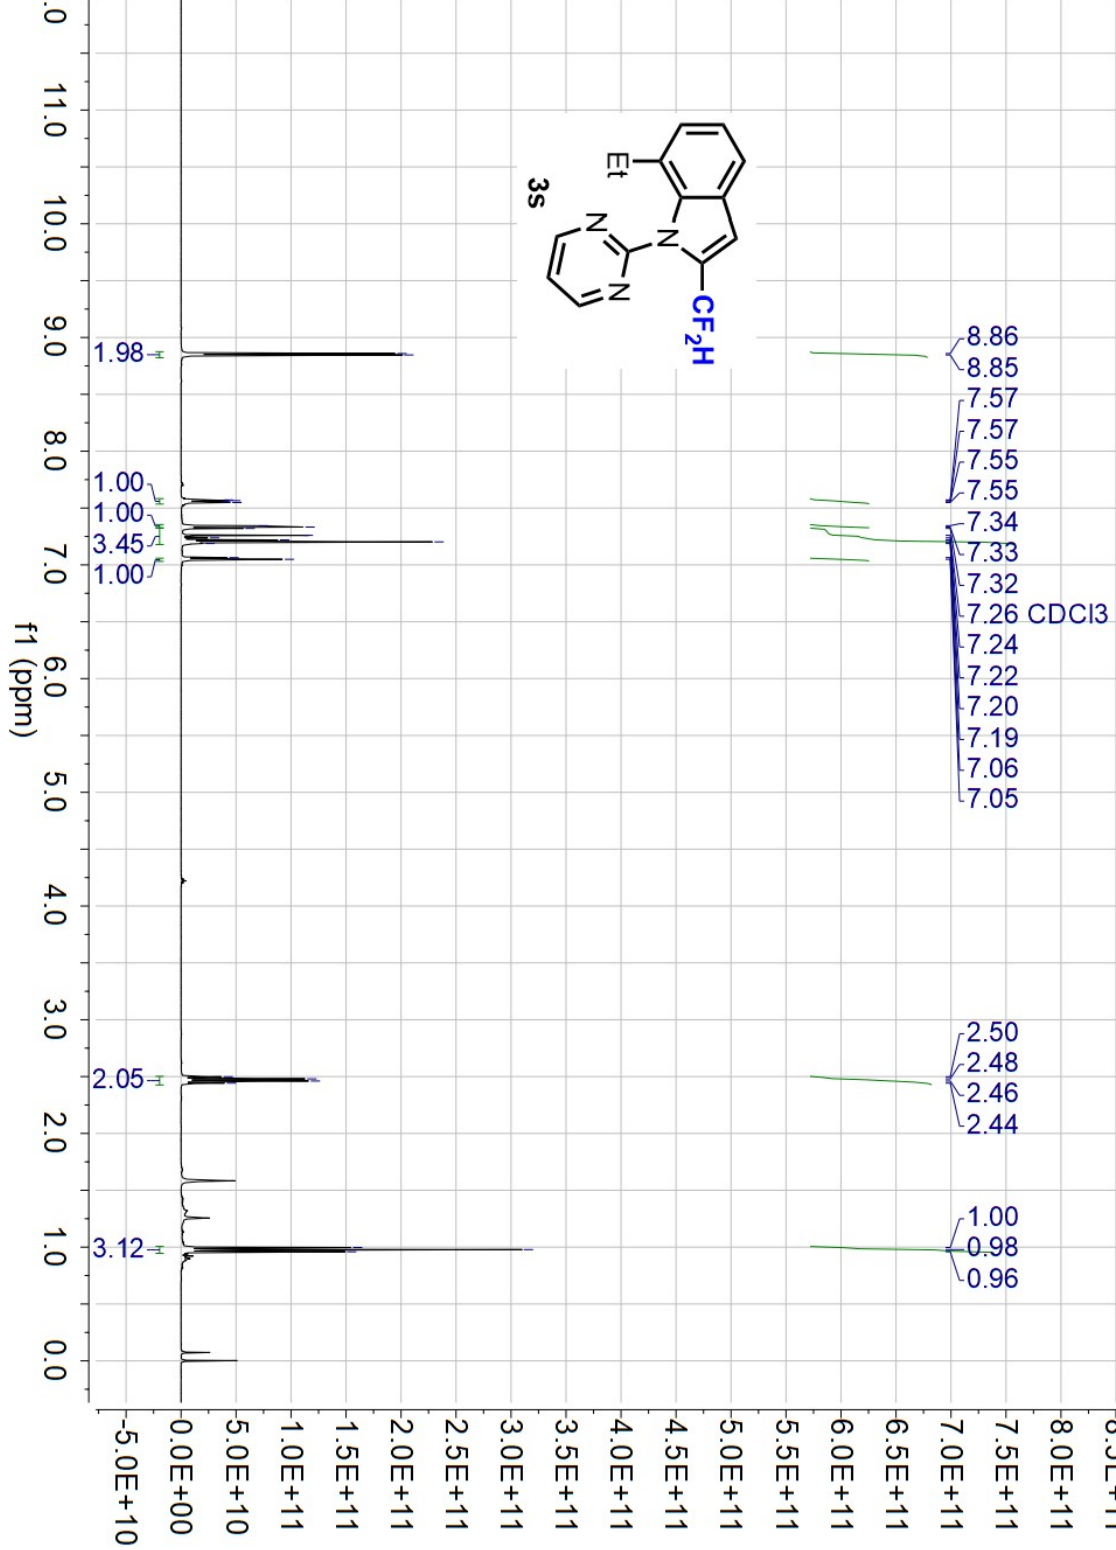

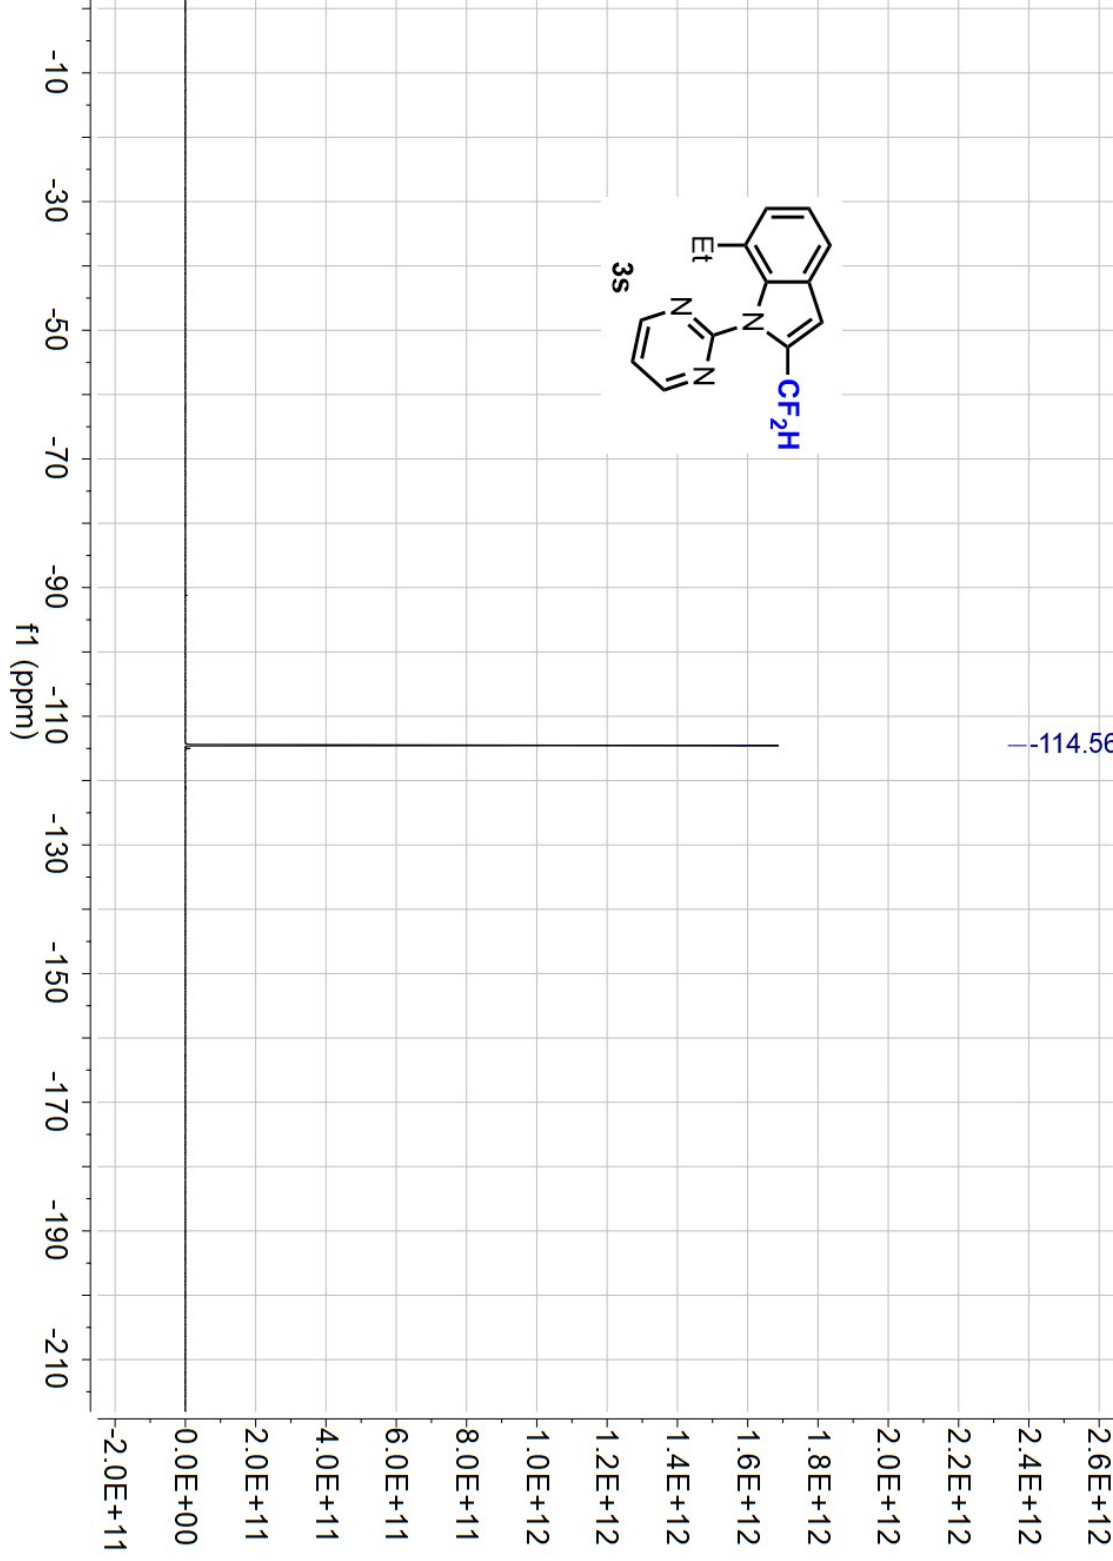

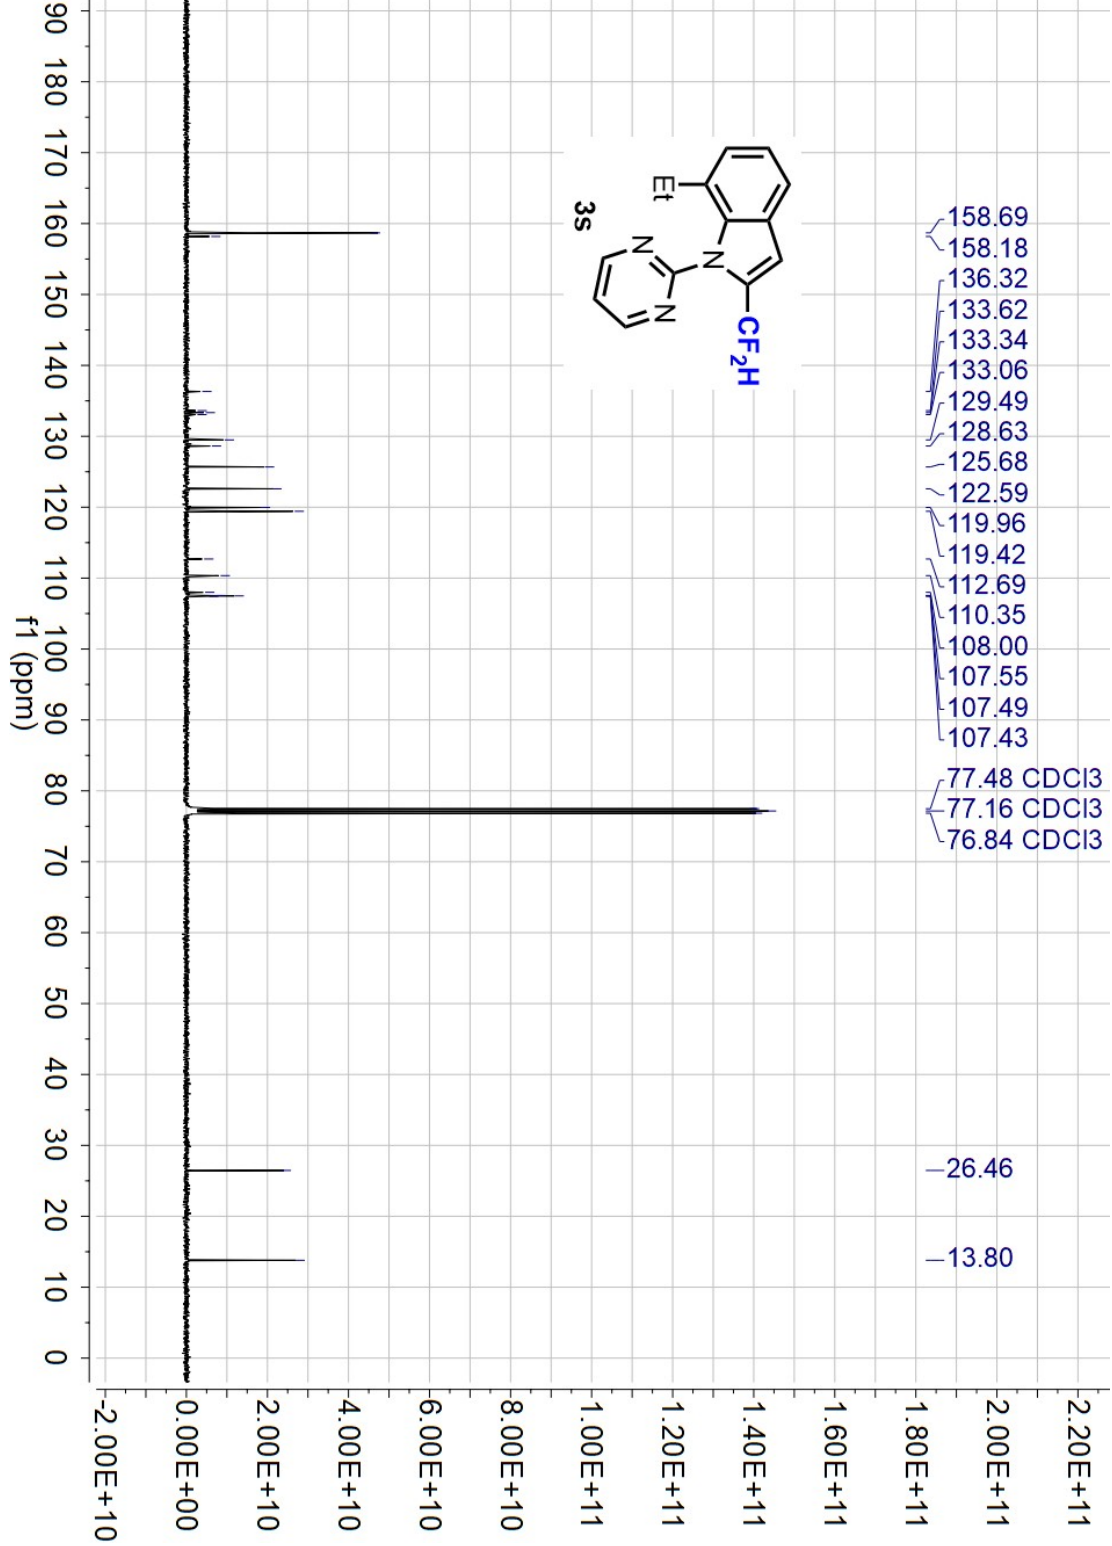



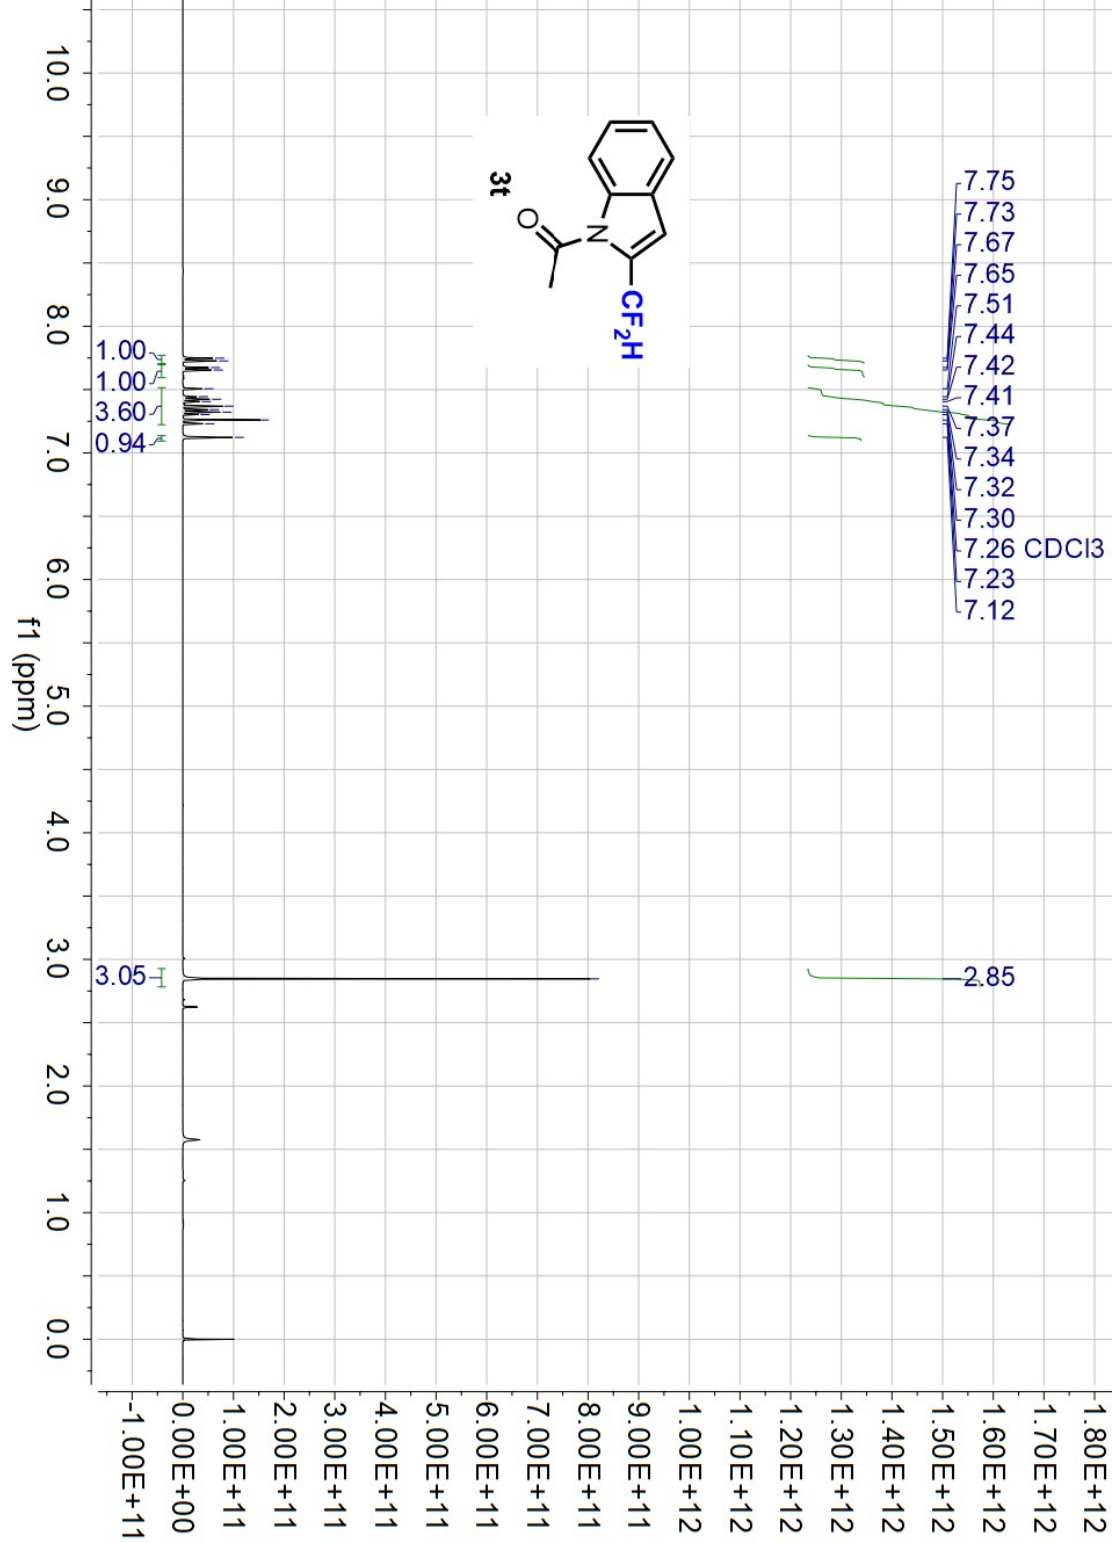

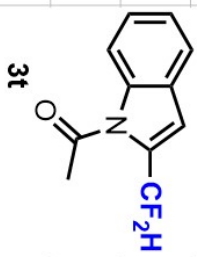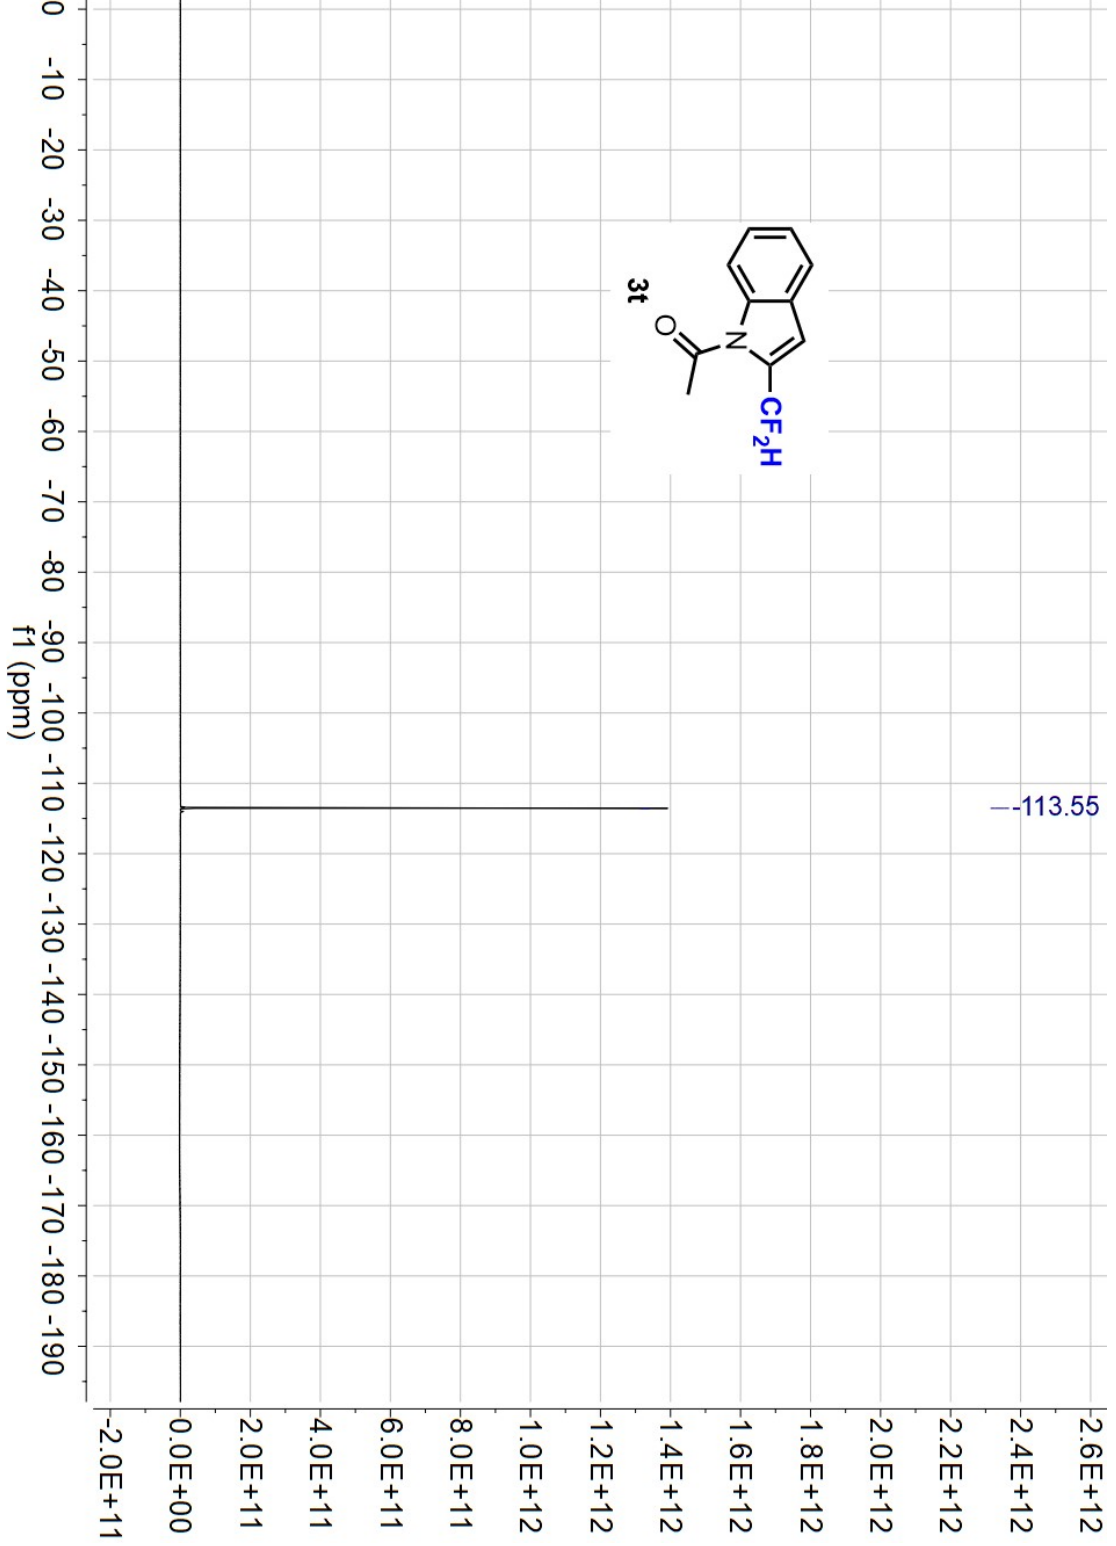

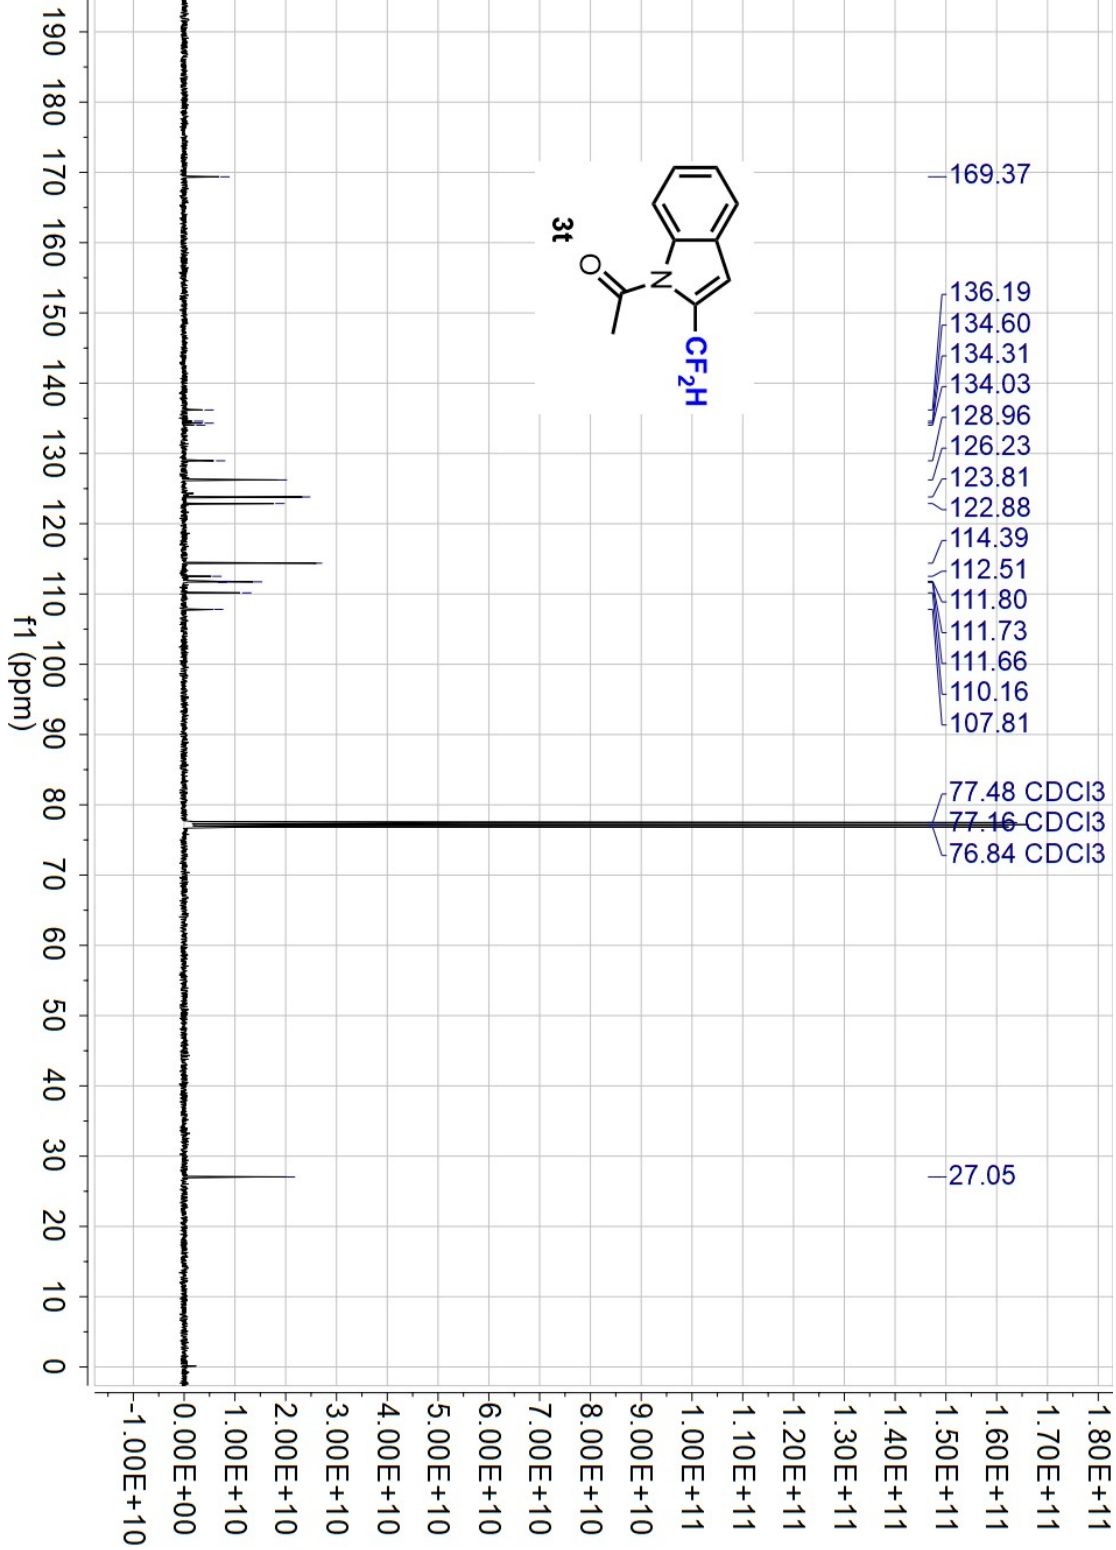

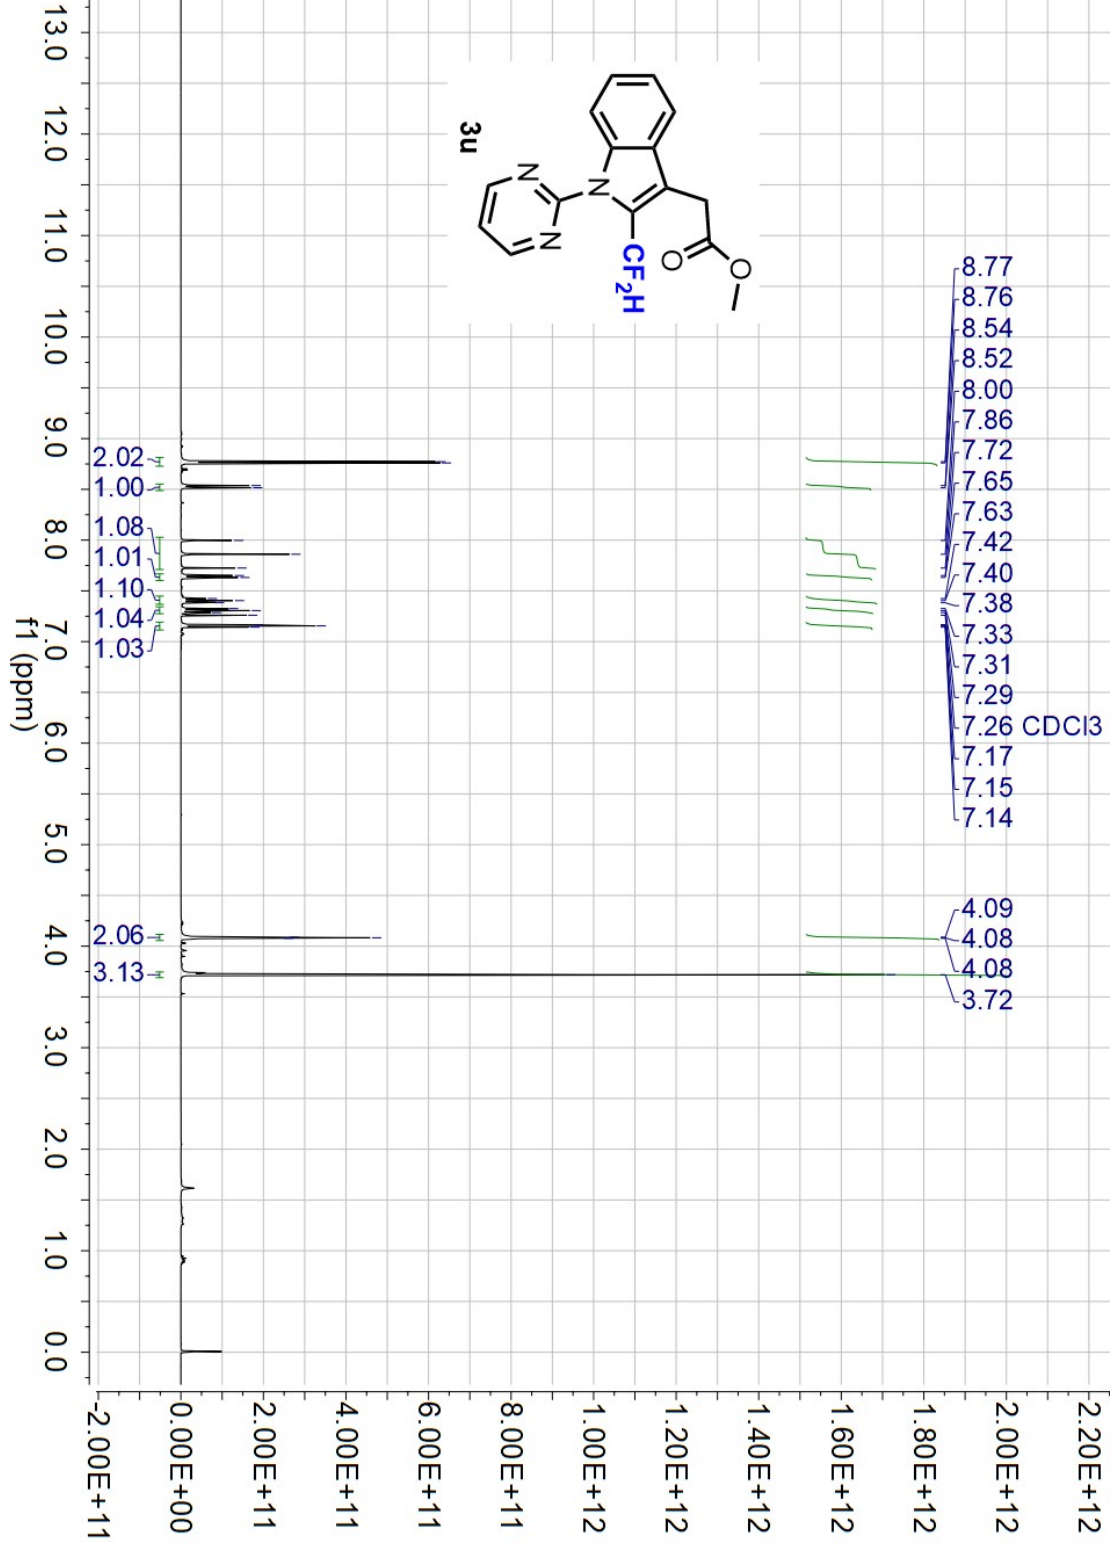

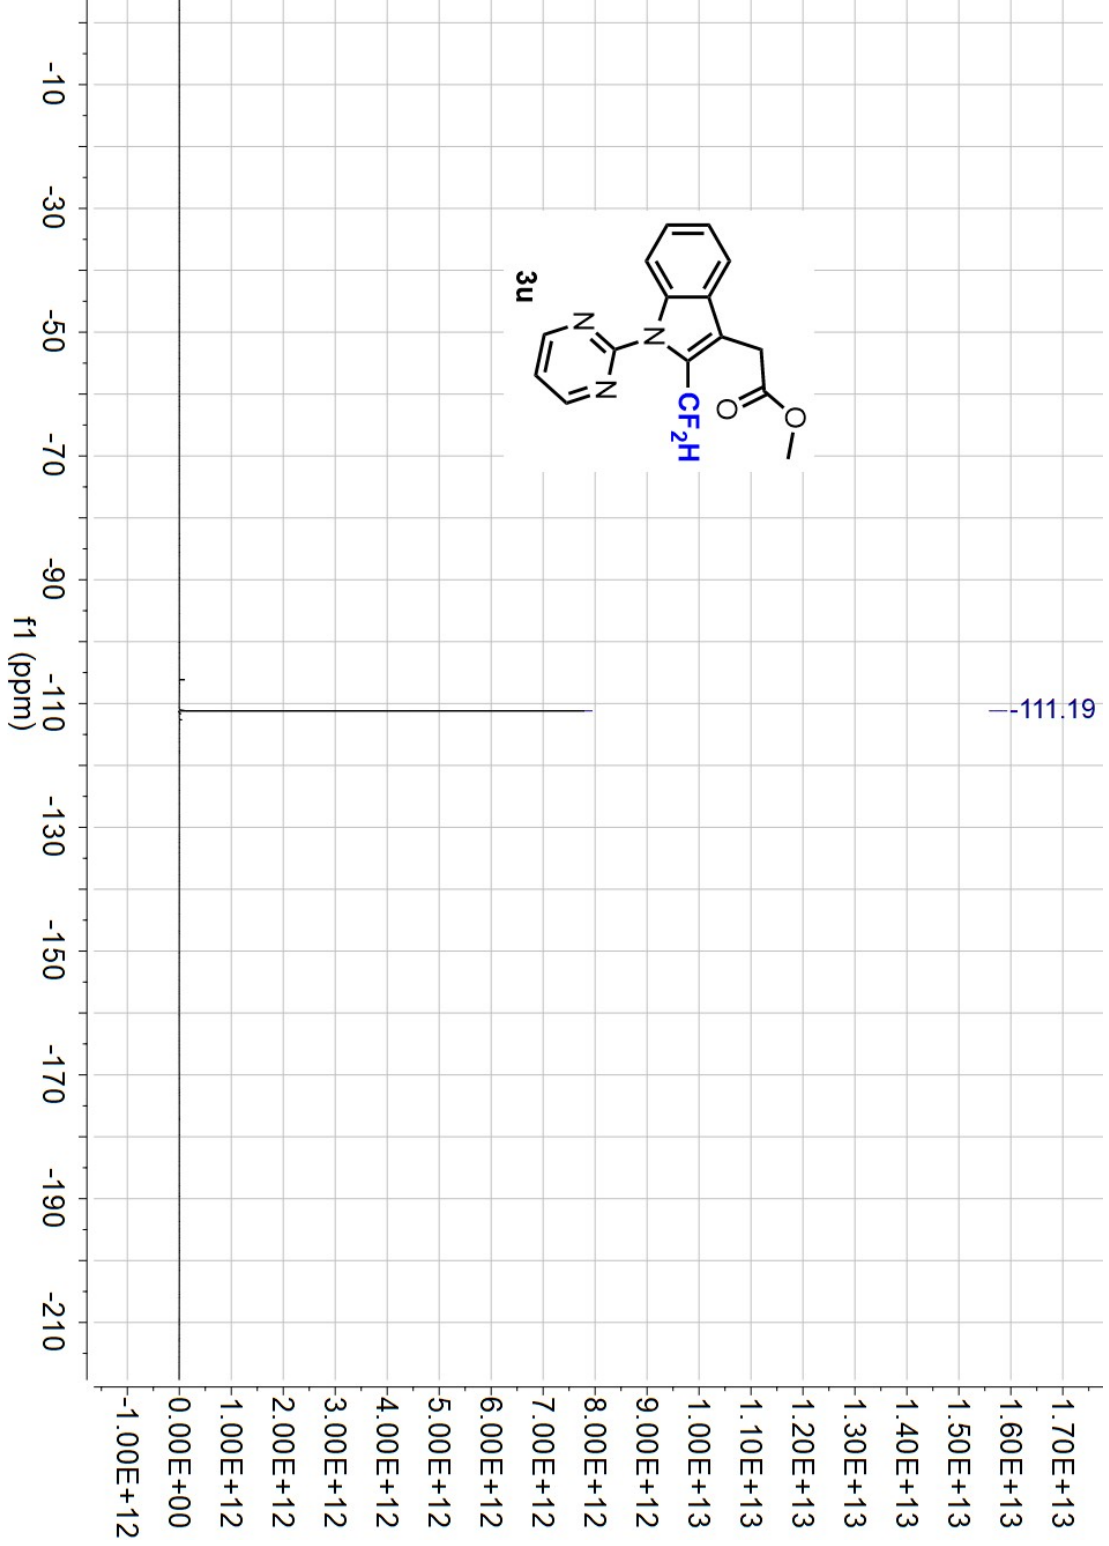

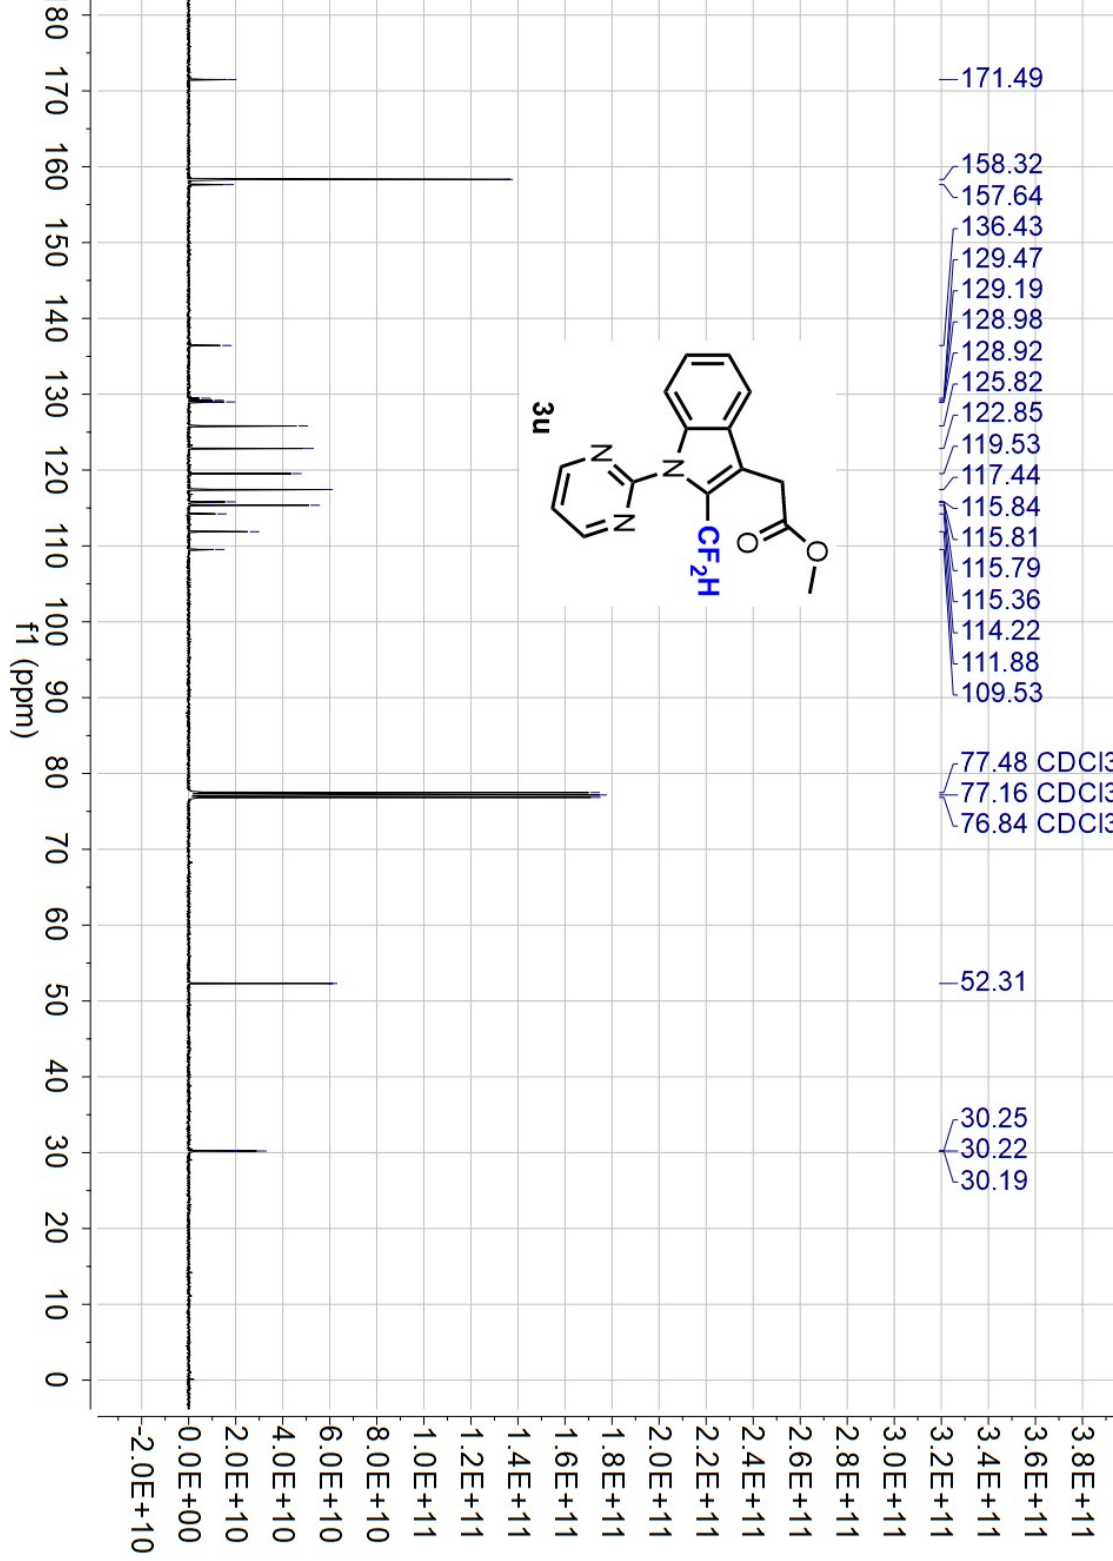

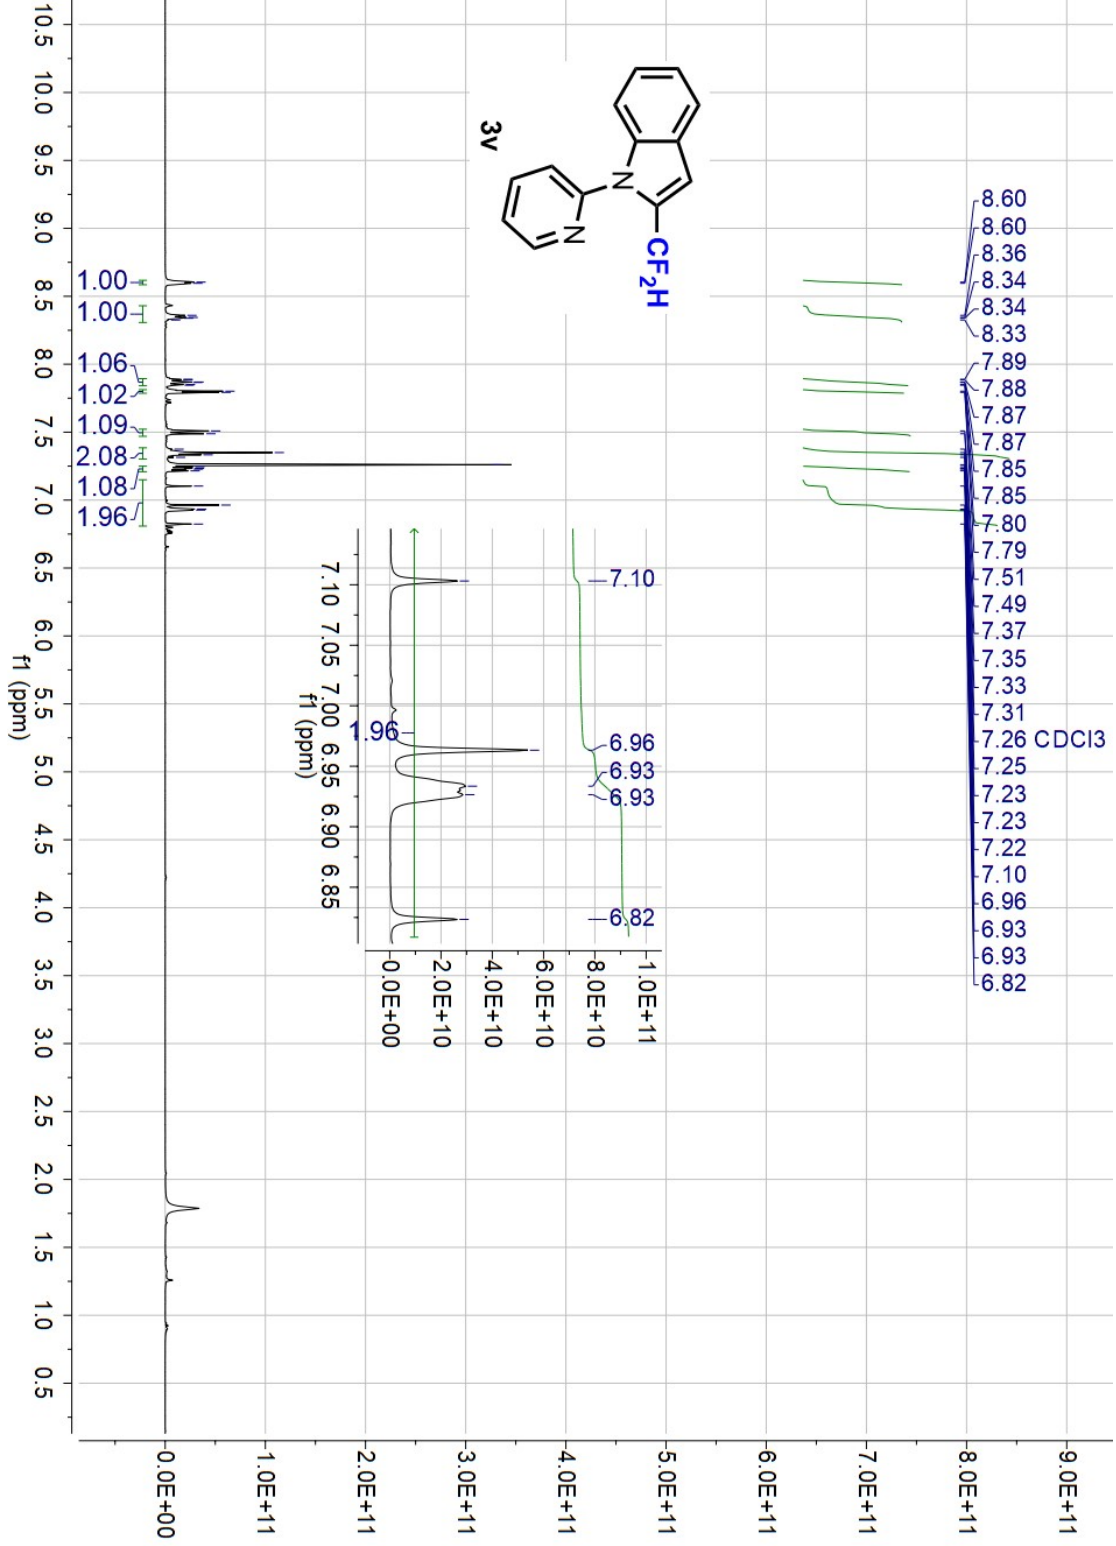

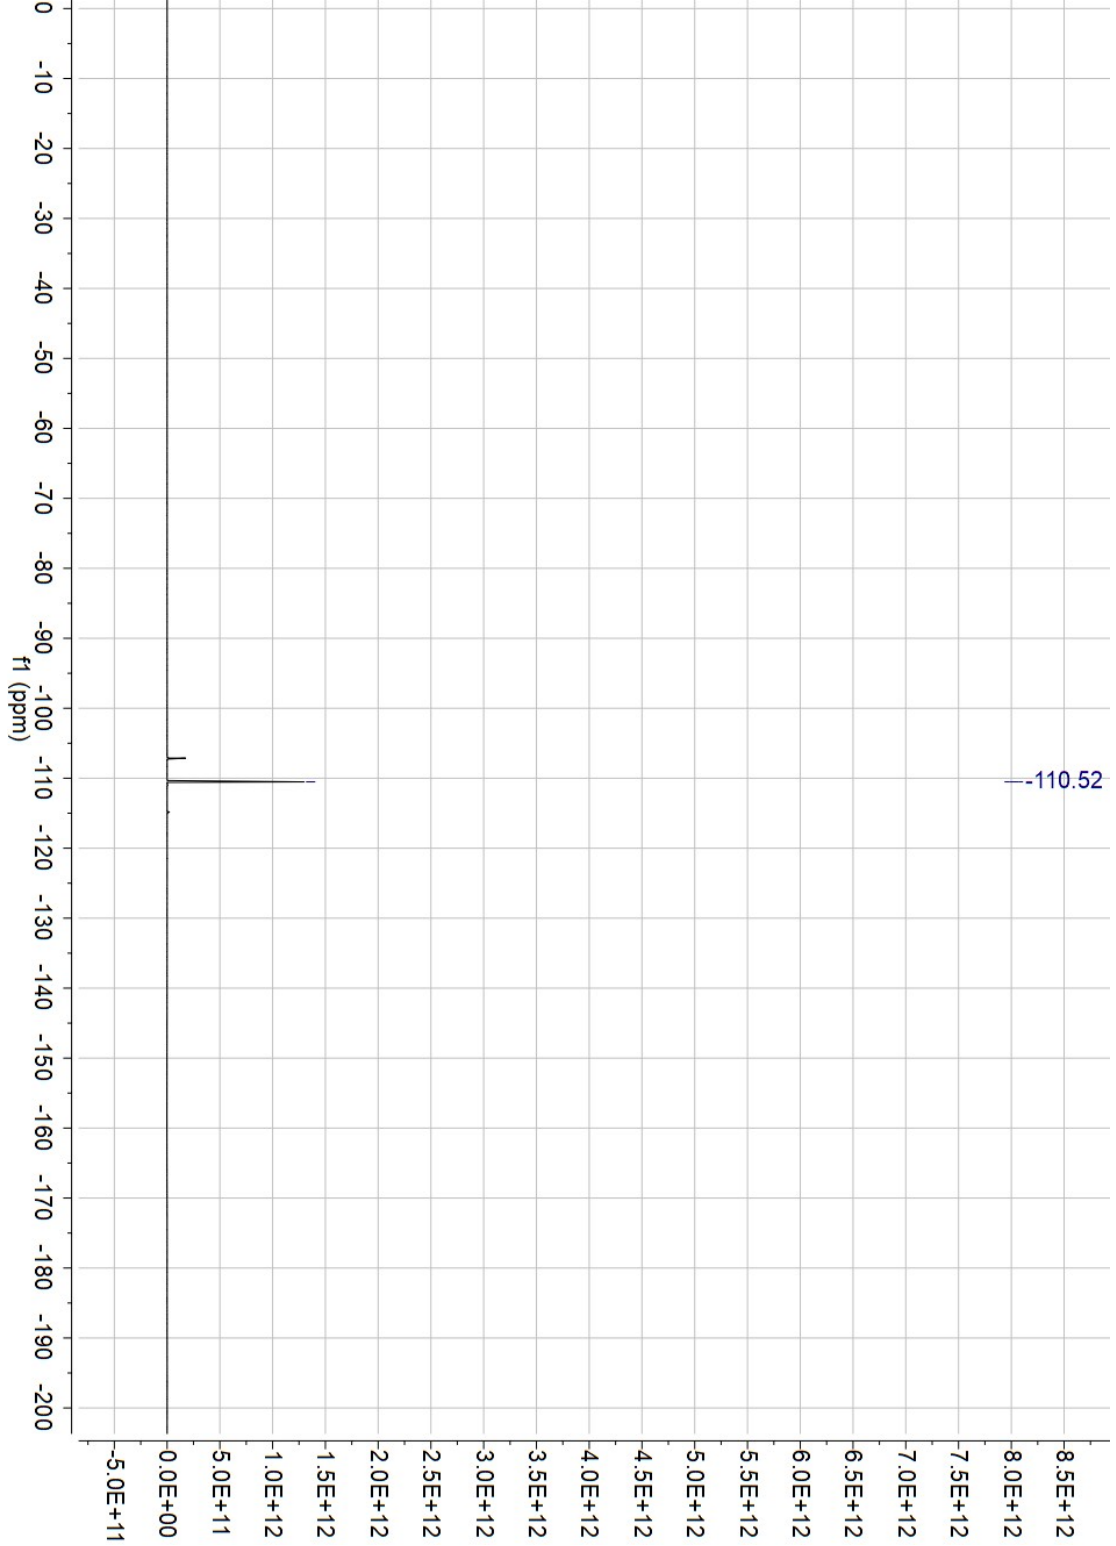



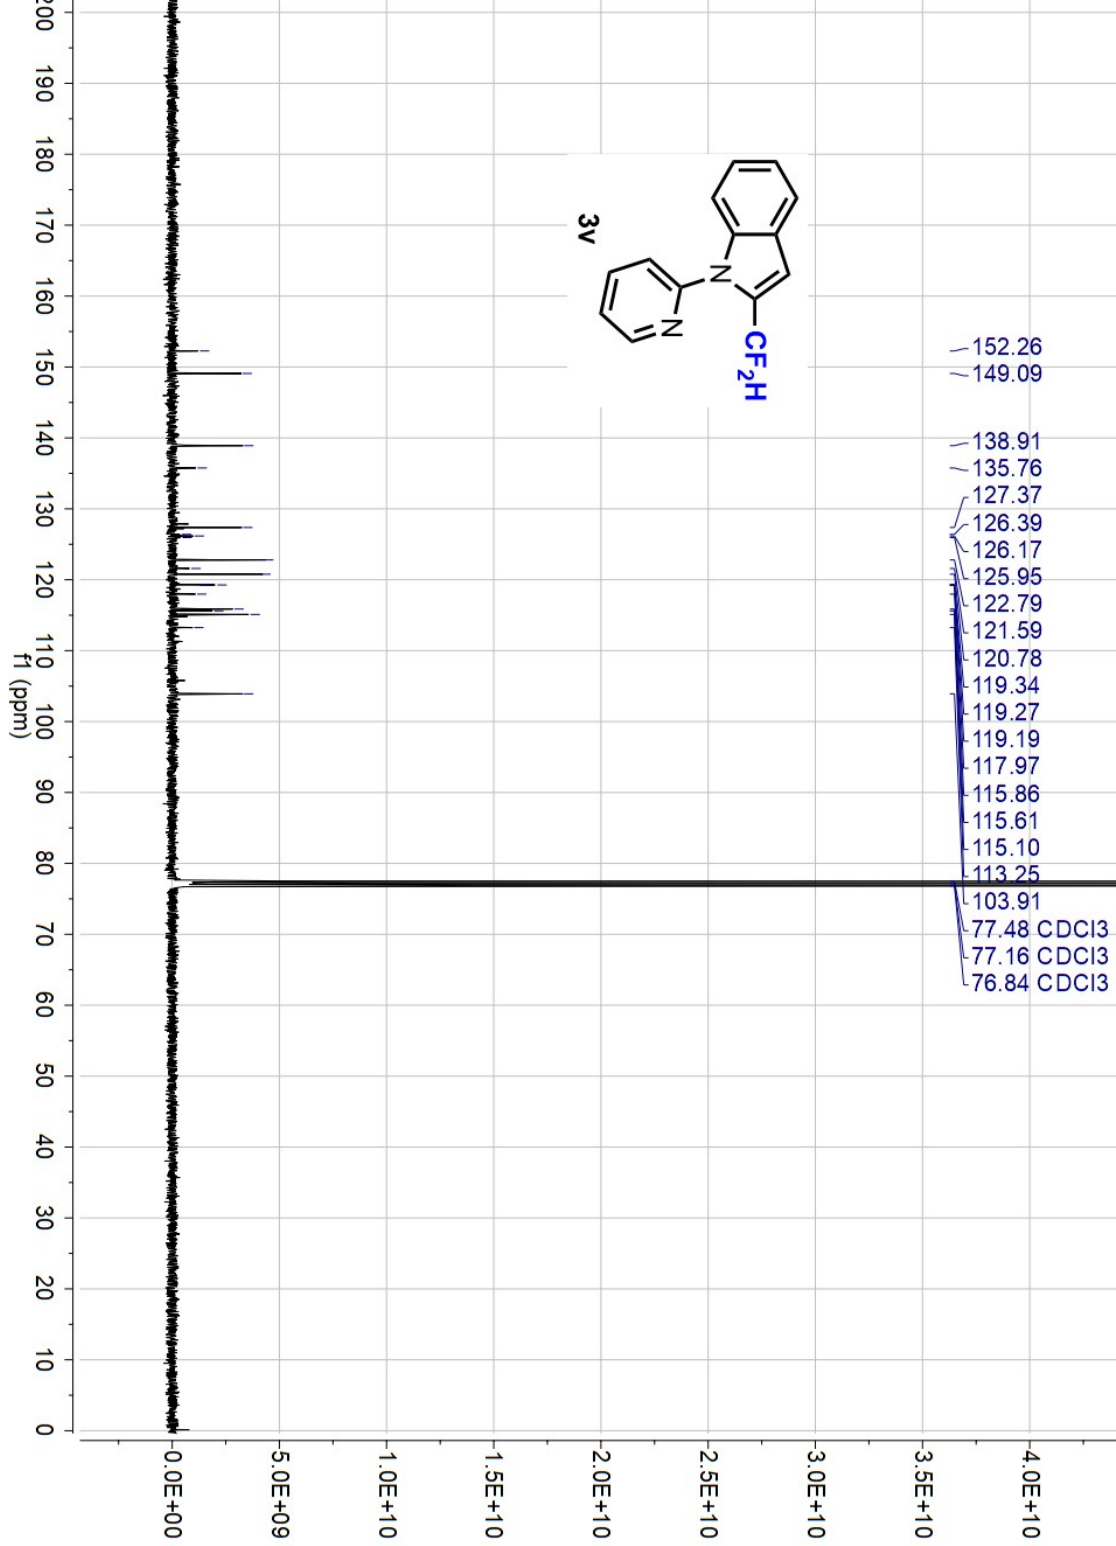

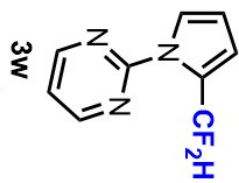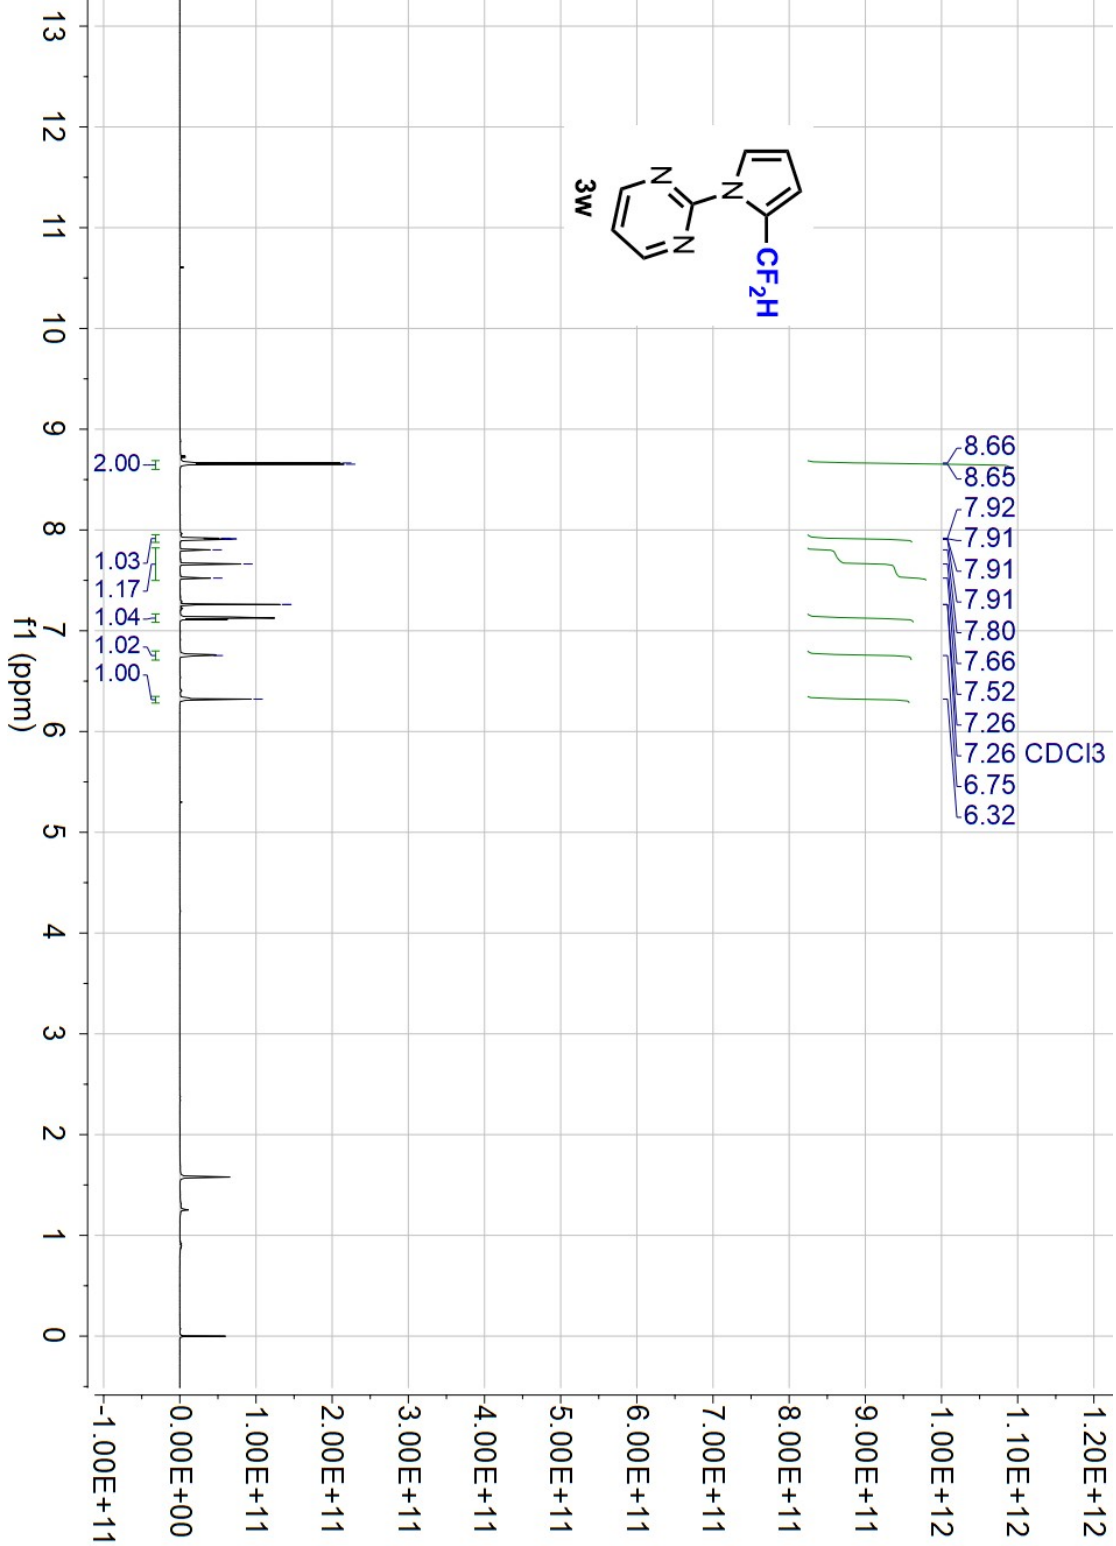

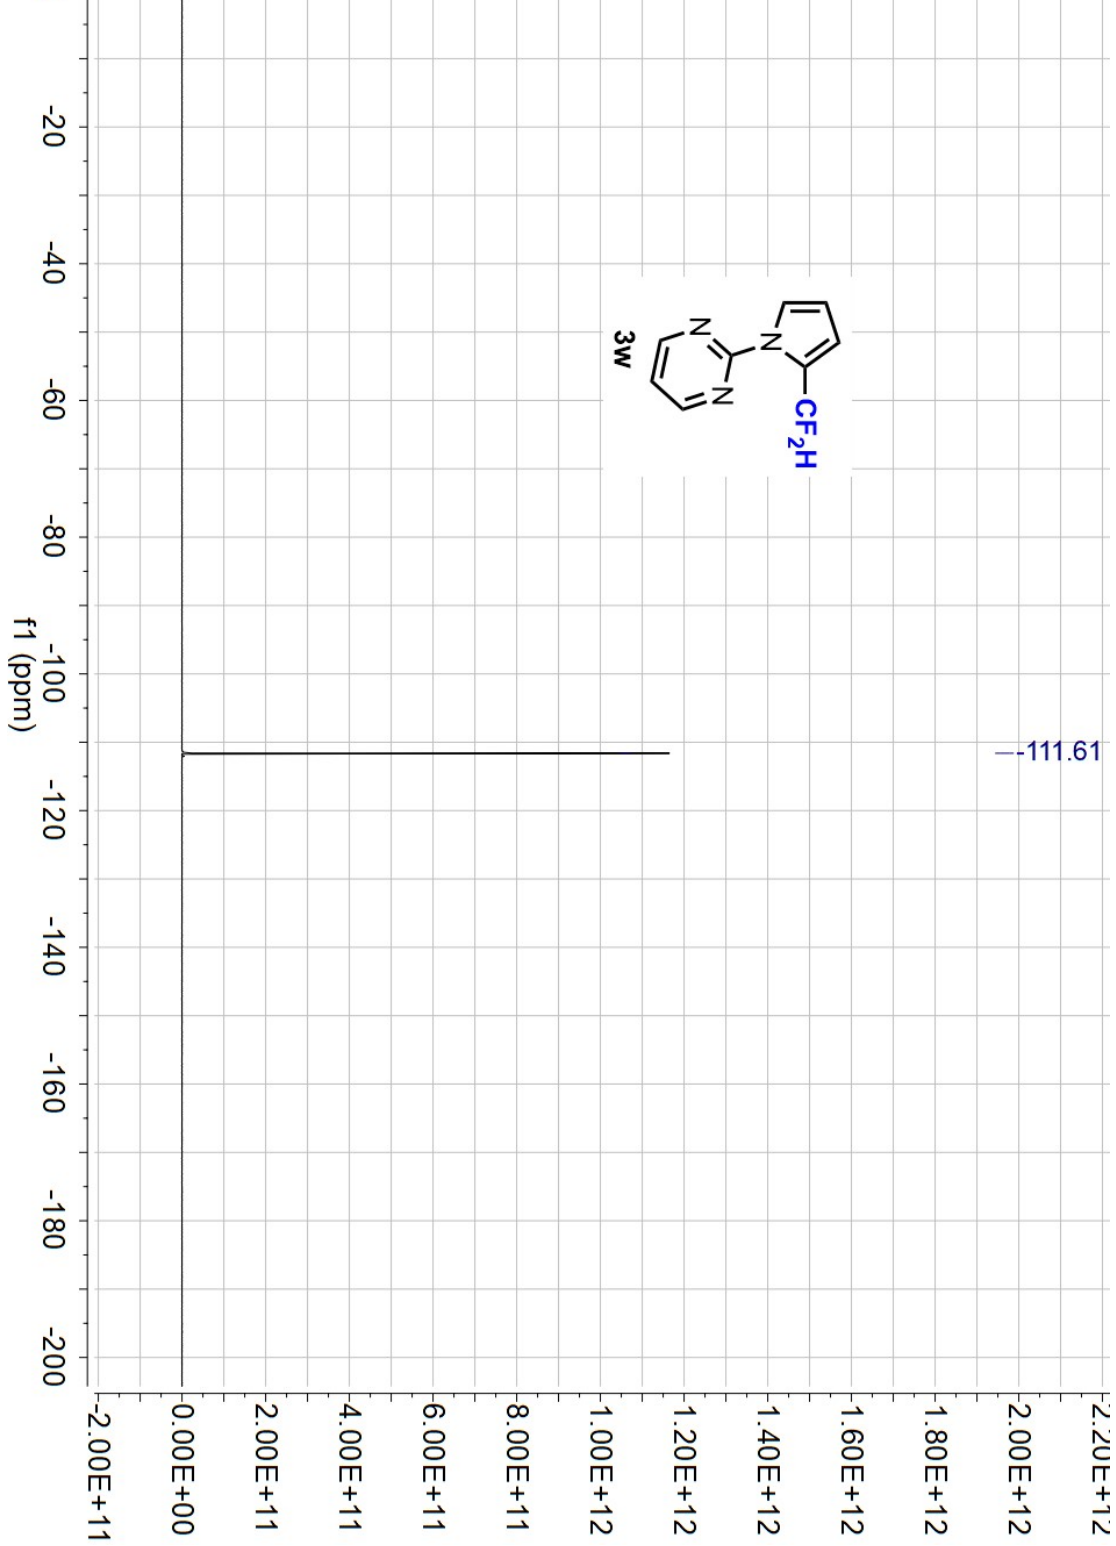

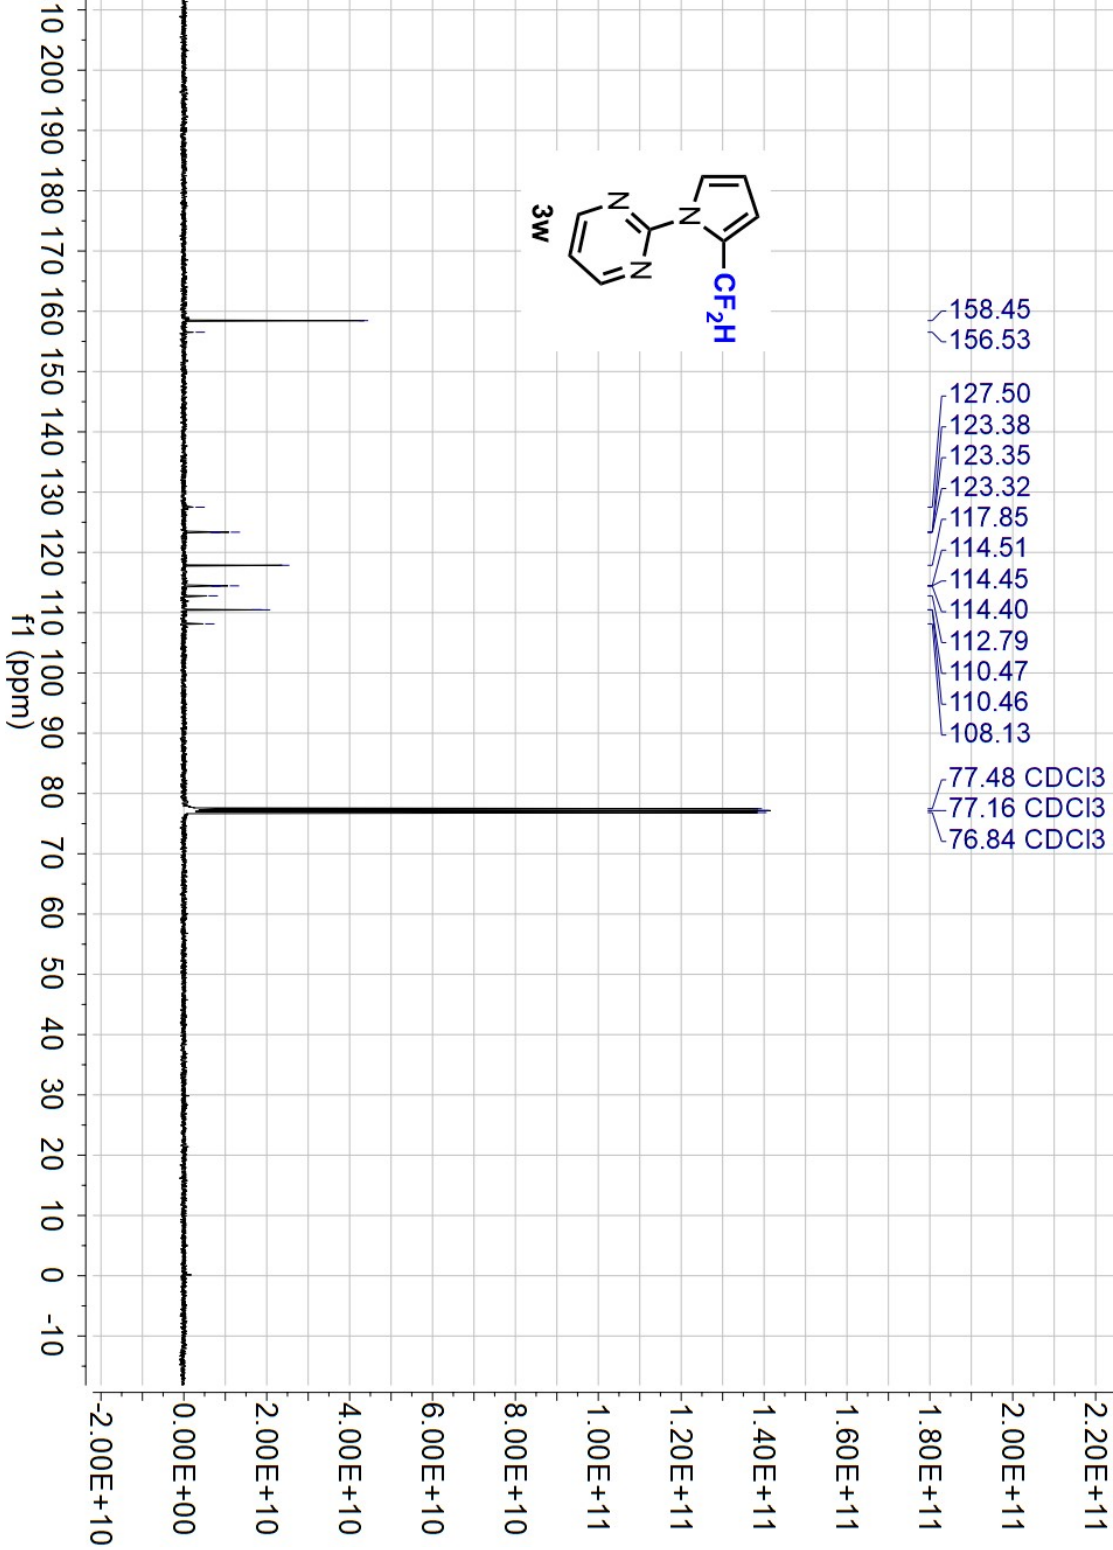

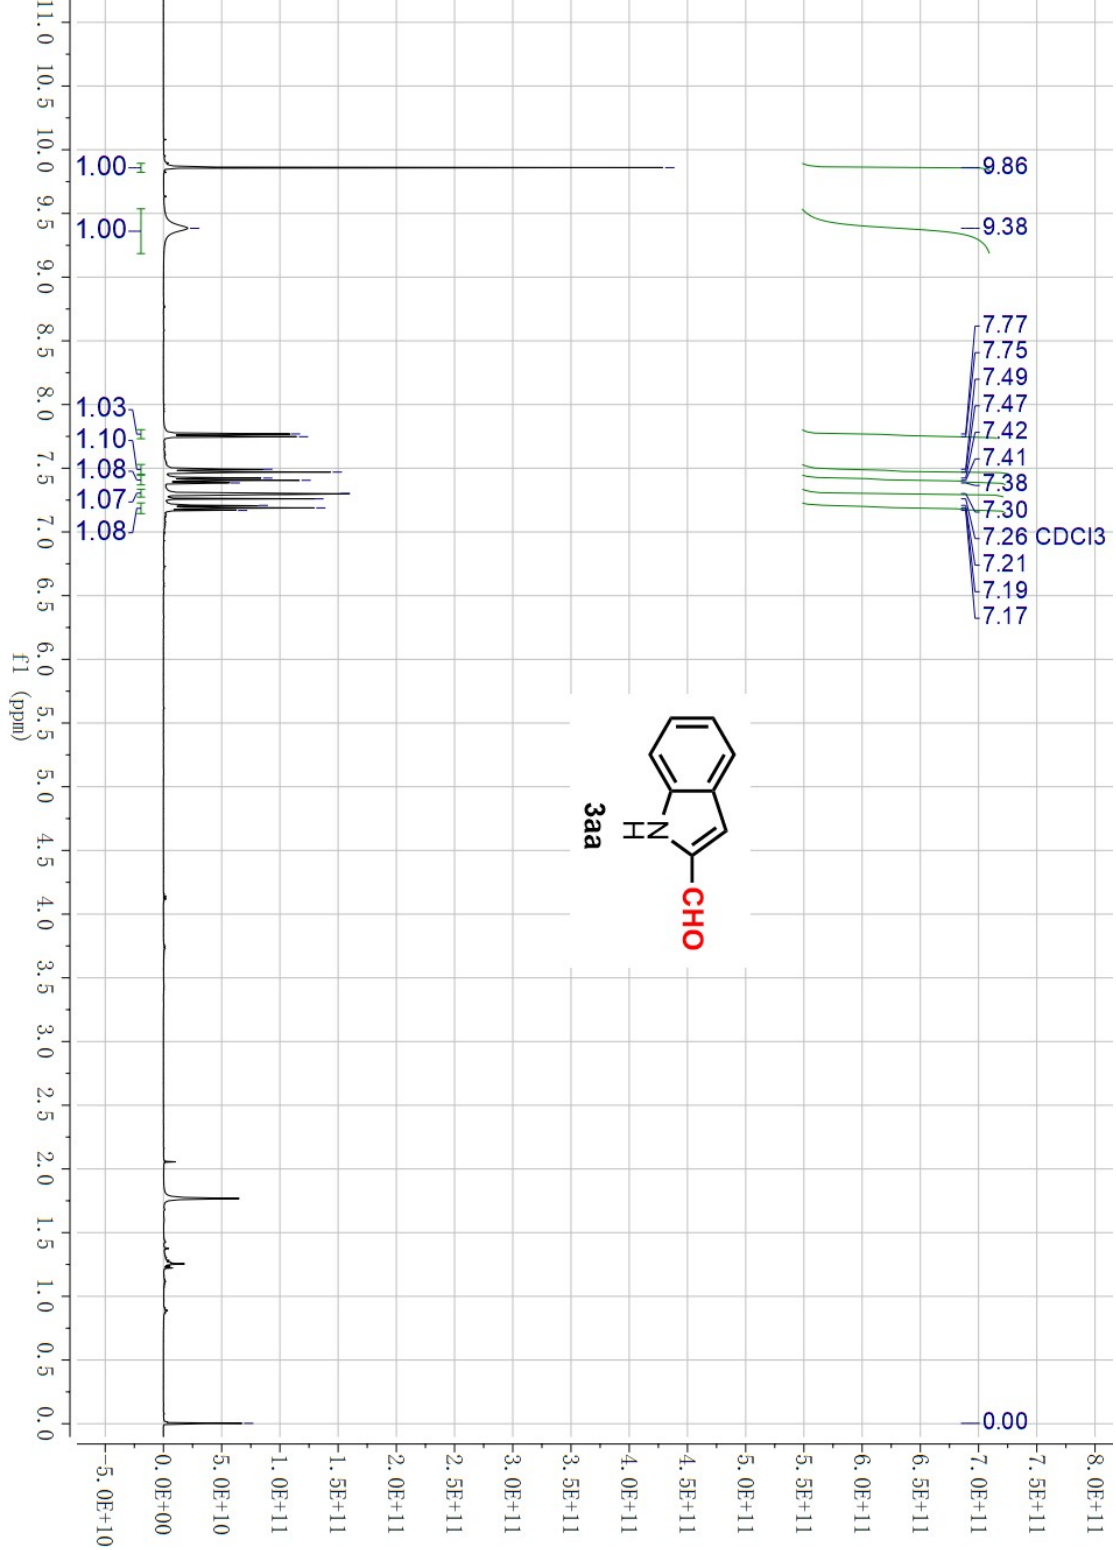

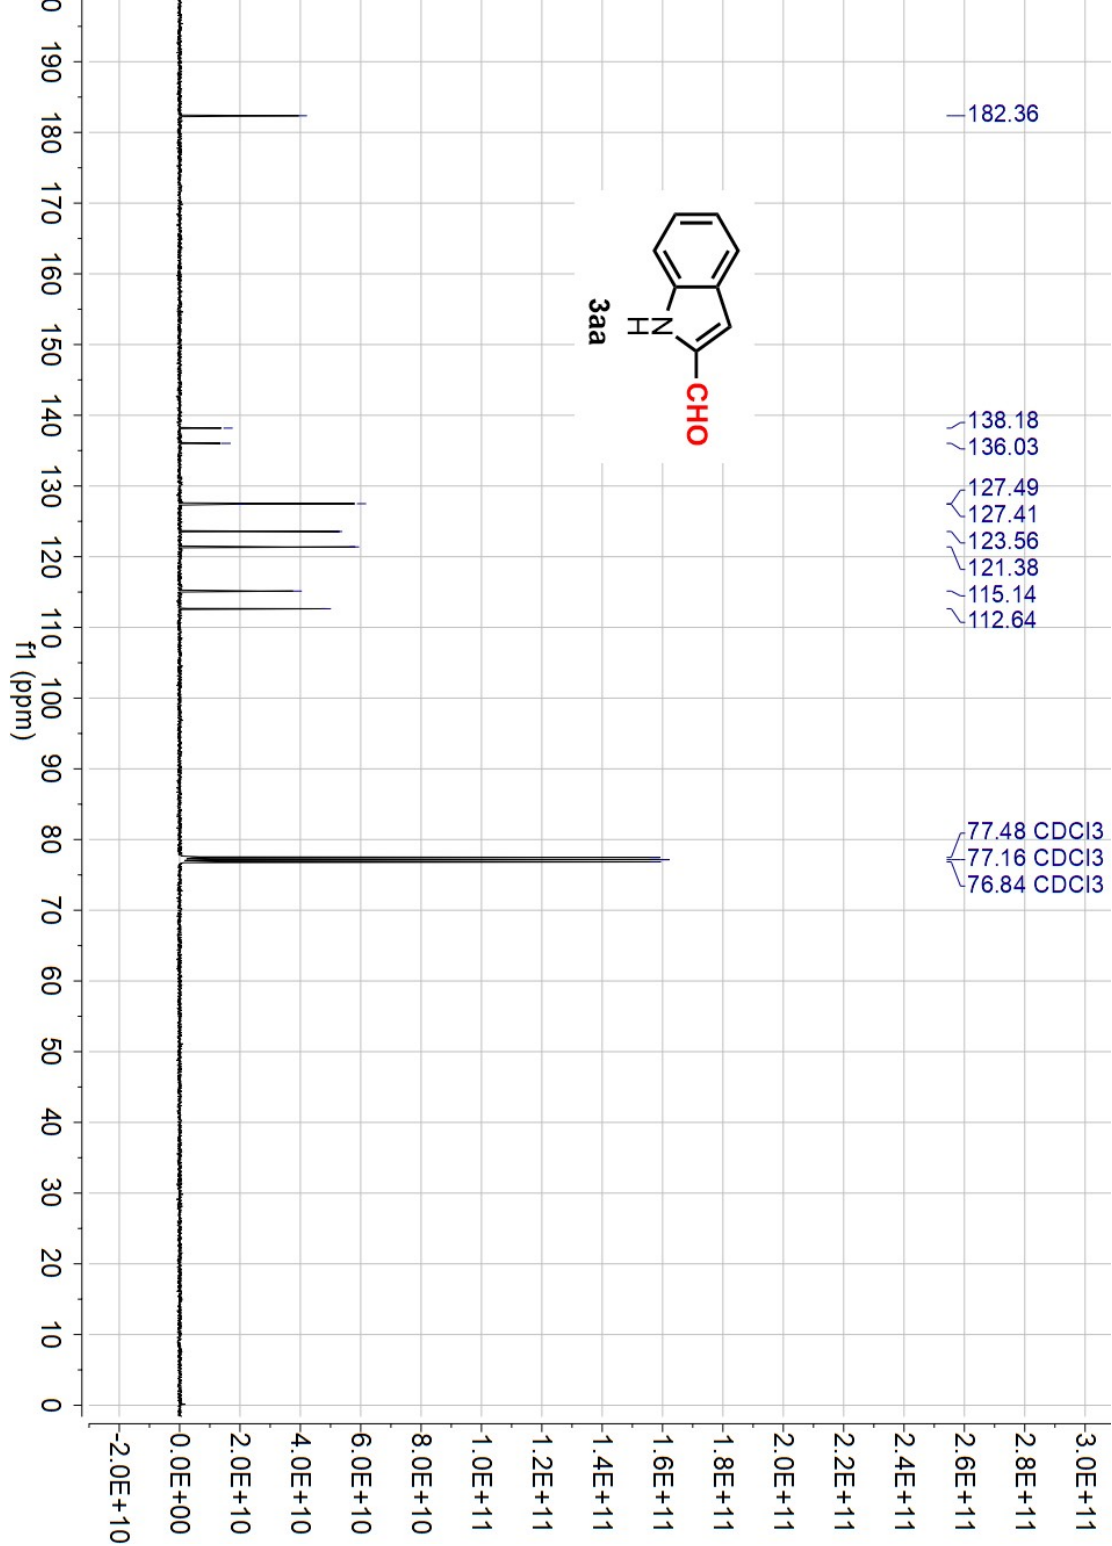

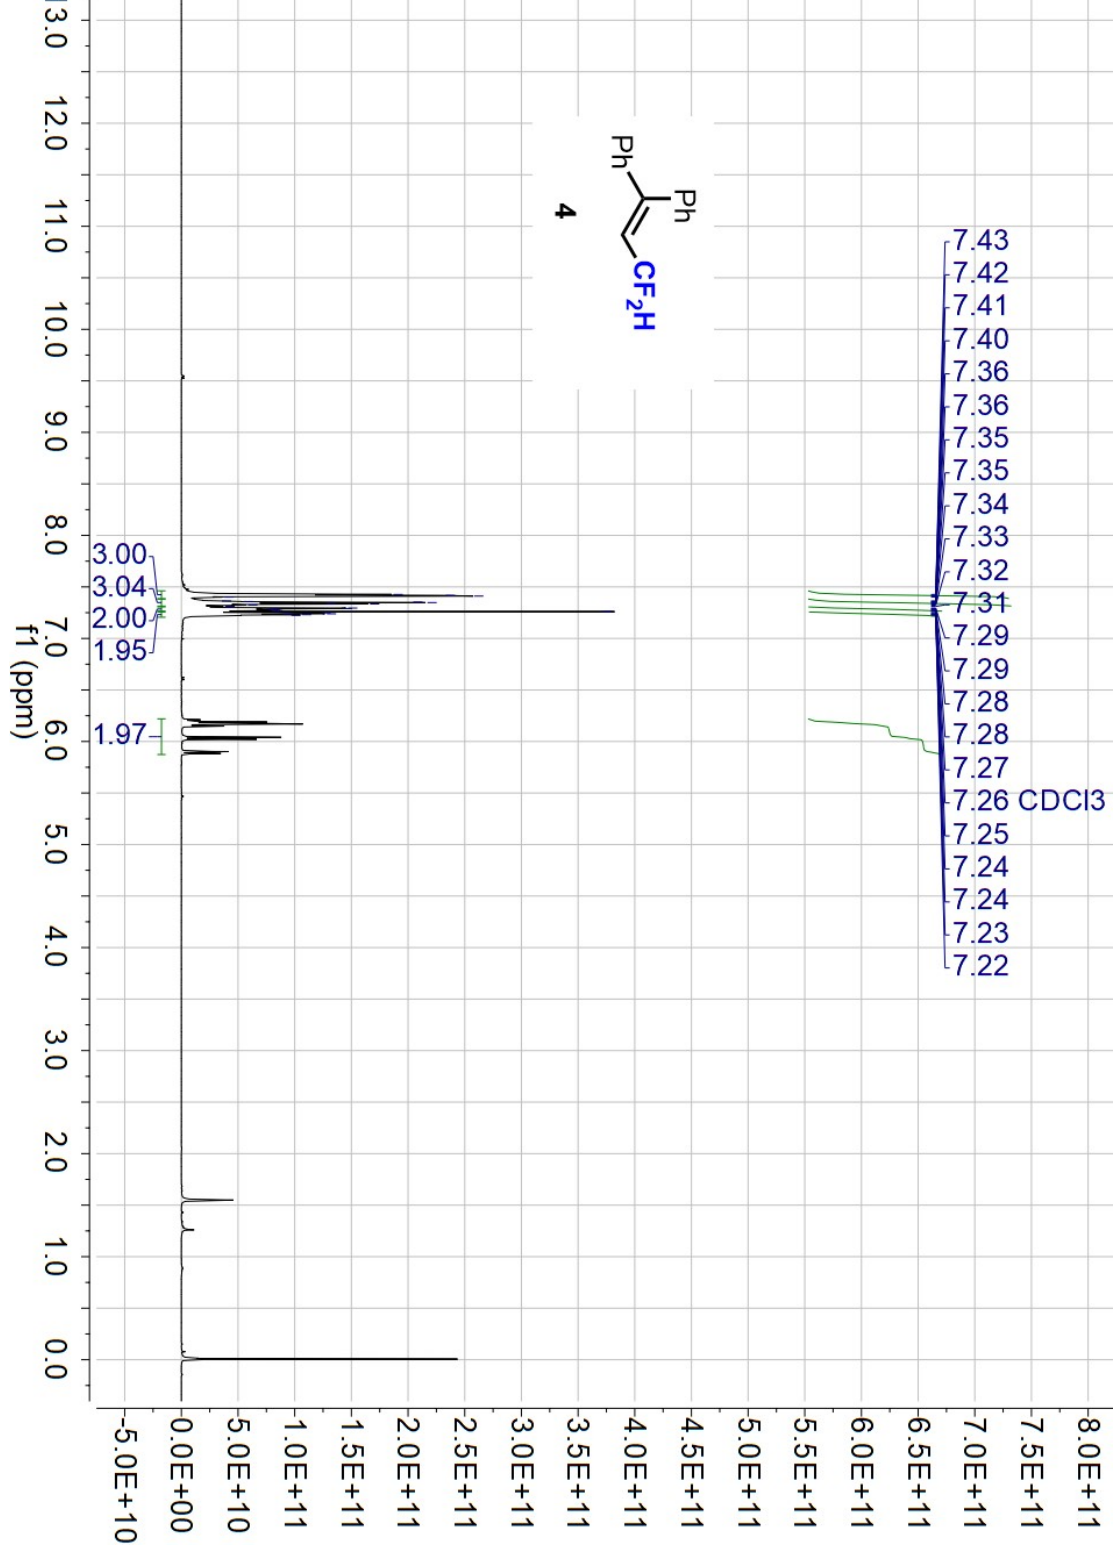

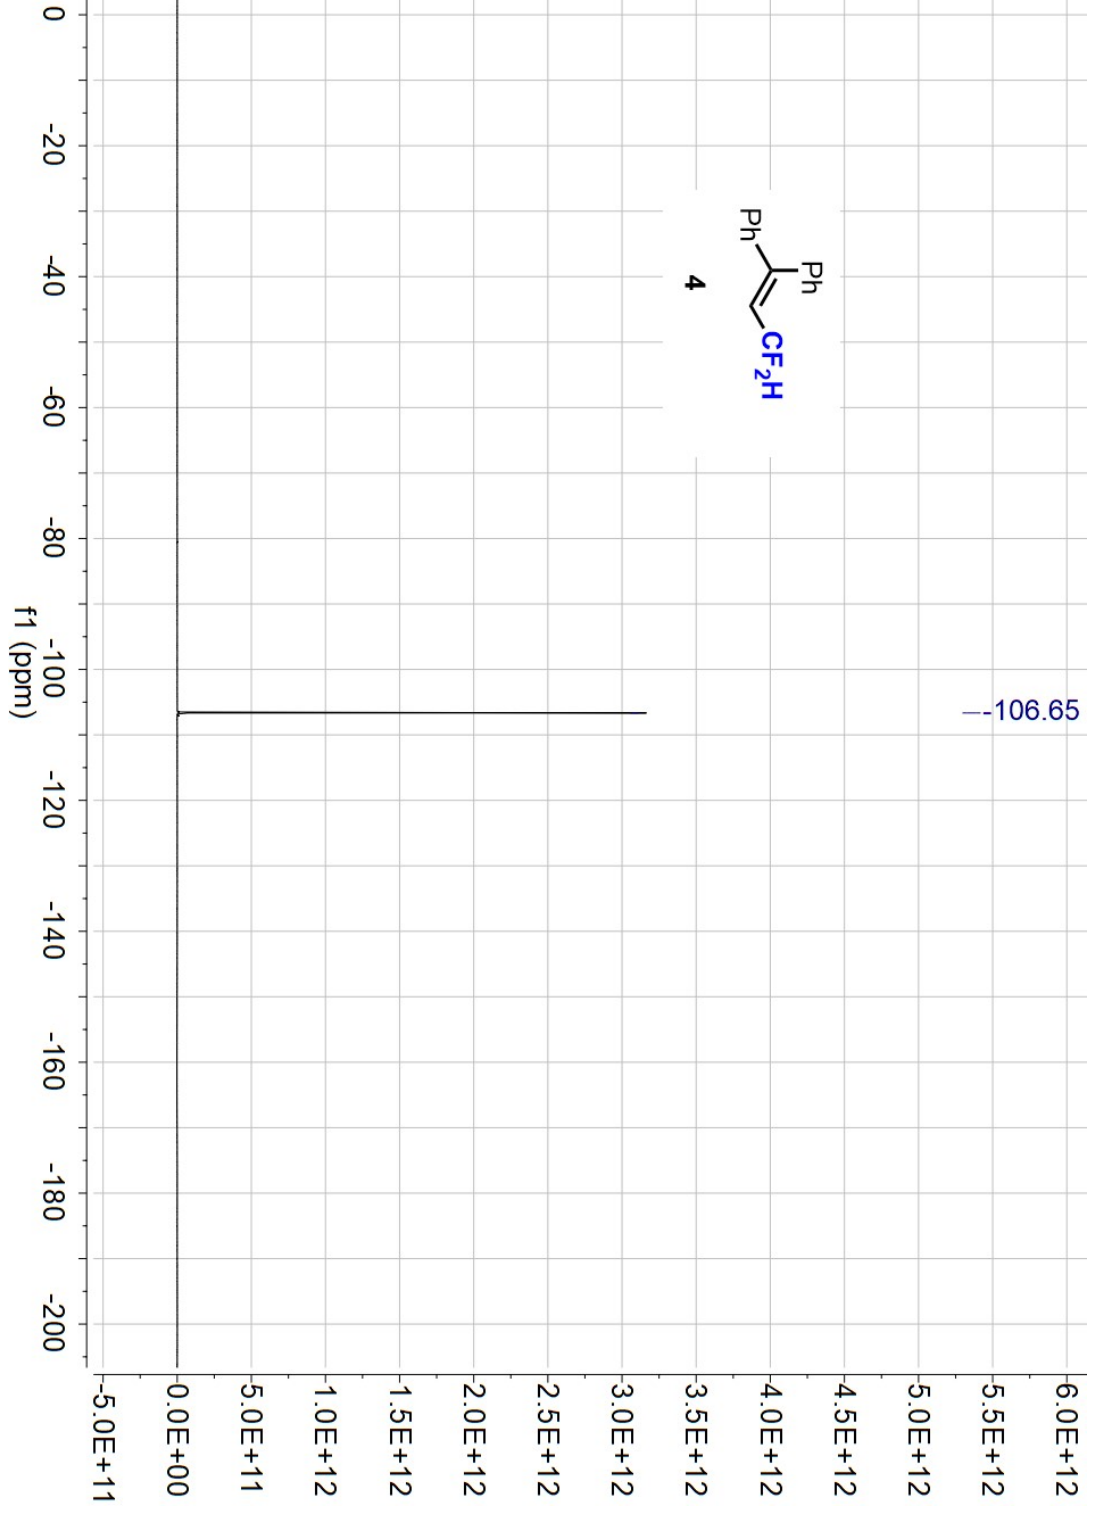



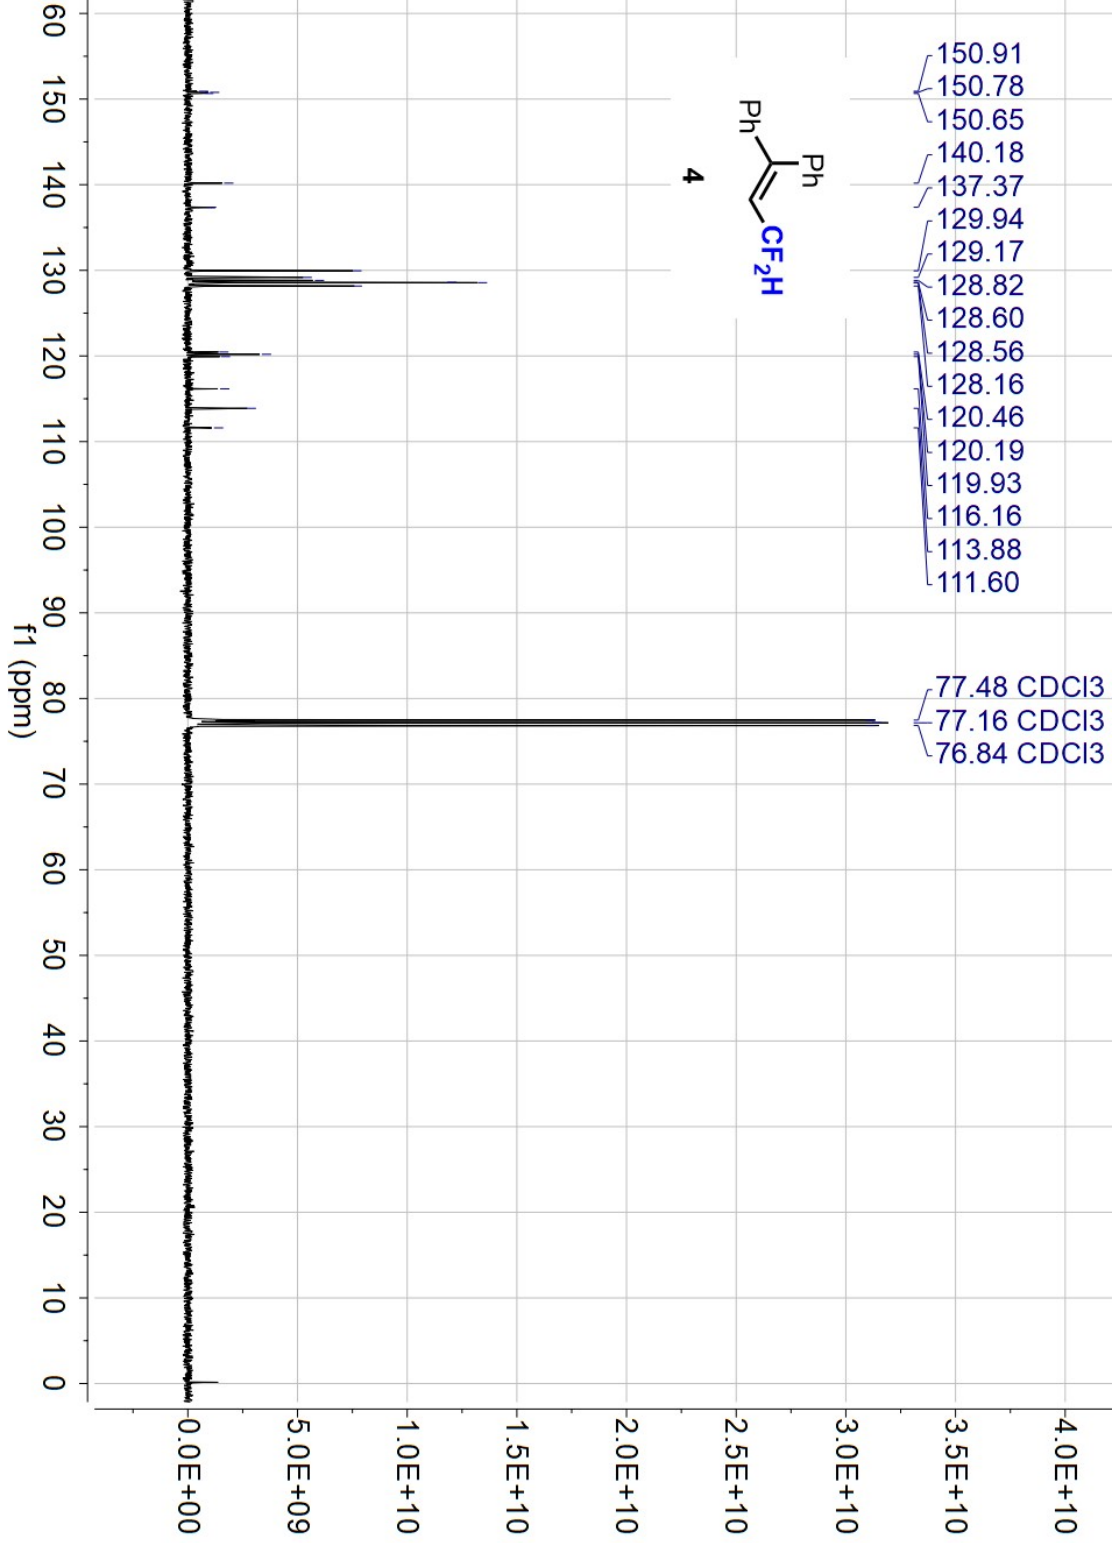

Supplement: d3ob00516j1.pdf [file d3ob00516j1.pdf]
